# Supplementary material for: (l)-Prolinamide imidazolium hexafluorophosphate ionic liquid as an efficient reusable organocatalyst for direct asymmetric aldol reaction in solvent-free condition
Source: Royal Society of Chemistry journal article supplement (doi:10.1039/c6ra23652a), 2016-01-01
Supplement: c6ra23652a1.pdf [file c6ra23652a1.pdf]

**(L)-Prolinamide imidazolium hexafluorophosphate ionic liquid as an efficient reusable organocatalyst for direct asymmetric aldol reaction in solvent-free condition**

Geeta Devi Yadav and Surendra Singh\*

*Department of Chemistry, University of Delhi, Delhi, India-110007*

*Email:ssingh1@chemistry.du.ac.in*

|                                                            |             |
|------------------------------------------------------------|-------------|
| 1. Procedures for synthesis of compounds                   | Pages 2-8   |
| 2. Mass spectra of compounds                               | Page 10-13  |
| 2. <sup>1</sup> H and <sup>13</sup> C-NMR of the compounds | Pages 14-54 |
| 3. HPLC chromatogram of the aldol products                 | Pages 55-76 |

### **(2*S*,4*R*)-1-(*tert*-butoxycarbonyl)-4-hydroxypyrrolidine-2-carboxylic acid (**5**)<sup>1</sup>**

*Trans*-4-hydroxy-*L*-proline **4** (2.5 g, 19 mmol) was dissolved in 38 mL of THF/H<sub>2</sub>O (2/1) and then treated with 10% aqueous NaOH (8 mL) followed by addition of di-*tert*-butyldicarbonate (6.0 g, 28 mmol). The reaction mixture was stirred at room temperature overnight and then THF was removed by rotary vapor. The residue was adjusted to pH 2 by the addition of 10% aqueous KHSO<sub>4</sub>. The acidic solution was extracted several times with ethyl acetate. The combined organic extracts were washed with H<sub>2</sub>O and brine, dried over anhydrous Na<sub>2</sub>SO<sub>4</sub>. The solvent was removed by rotavapor afforded compound **5** as a syrup (4.4 g, 100%), which was used without purification for next step.  $[\alpha]_{\text{D}}^{25} = -68.1$  (*c* 1.3, MeOH). IR (KBr) 3462, 2976, 2934, 1740, 1639 cm<sup>-1</sup>. <sup>1</sup>H-NMR (400 MHz, CDCl<sub>3</sub>):  $\delta = 7.52$  (brs, 1H), 4.44–4.12 (m, 1H), 3.50–3.32 (m, 2H), 2.10–1.80 (m, 4H), 1.47 (s, 9H) ppm. <sup>13</sup>C NMR (100 MHz, CDCl<sub>3</sub>):  $\delta = 174.90, 153.68, 79.51, 68.81, 57.51, 53.14, 30.52, 27.73$  ppm.

### **(2*S*, 4*R*)-*tert*-Butyl-4-hydroxy-2-((*S*)-1-phenylethylcarbamoyl)pyrrolidine-1-carboxylate (**6**)<sup>1</sup>**

Compound **5** (2.14 g, 9.3 mmol) was dissolved in dry dichloromethane (25 mL), triethylamine (1.54 mL, 11.1 mmol) and ethyl chloroformate (1.05 mL, 11.1 mmol, in dichloromethane (5 mL)) were added slowly at 0°C and stirred for 15 min. (*S*)-1-Phenylethylamine (1.19 mL, 9.3 mmol) in 5 mL dichloromethane was added to above solution and reaction mixture was allowed to attain room temperature and stirred for 5 h. Reaction mixture was concentrated by rota vapor. The resulting oil was purified on silica gel using 30% ethyl acetate in hexane giving colourless oil **6** (2.5 g, 81%).  $[\alpha]_{\text{D}}^{25} = -97.3$  (*c* 2.0, MeOH). IR (K Br): 3302, 2976, 1666, 1547 cm<sup>-1</sup>. <sup>1</sup>H NMR (400 MHz, CDCl<sub>3</sub>):  $\delta = 7.51$  (brs, 1H), 7.24–7.16 (m, 5H), 5.04–4.95 (m, 1H), 4.53–4.21 (m, 2H), 3.51–3.28 (m, 2H), 2.32–2.19 (m, 1H), 1.93–1.91 (m, 1H), 1.39 (s, 9H), 1.29–1.17 (m, 3H) ppm. <sup>13</sup>C NMR (100 MHz, CDCl<sub>3</sub>):  $\delta = 171.77, 155.57, 143.00, 128.12$  (2C), 126.61, 125.81 (2C), 80.14, 69.09, 59.39, 54.08, 48.37, 36.36, 27.86, 21.43 ppm.

#### **4.2.2 General procedure for asymmetric aldol reaction.**

The organocatalyst (**IL-3**) (10.8 mg, 0.02 mmol), cyclohexanone (0.310 mL, 3 mmol) and acetic acid (1.1  $\mu$ L, 0.02 mmol) was stirred for 20 min at –15 °C, then 4-nitrobenzaldehyde **10** (151 mg, 1 mmol) was added. The reaction mixture was stirred for a specified reaction time period at same temperature. The crude aldol product was purified by flash column chromatography on silica gel (hexane/ethyl acetate (3/1)). The diastereomeric ratio was determined by <sup>1</sup>H-NMR of the crude product. The *ee* of the aldol product was determined by HPLC using chiral column (chiralpak AD-H and OD-H) using hexane/2-propanol as mobile phase.

### **(*S*)-2-((*R*)-Hydroxy(4-nitrophenyl)methyl)cyclohexanone (Table 1, entry 2)<sup>1</sup>**

<sup>1</sup>H NMR (400 MHz, CDCl<sub>3</sub>):  $\delta = 8.14$  (d, *J* = 8.4 Hz, 2H), 7.45 (d, *J* = 8.4 Hz, 2H), 4.84 (dd, *J* = 7.60, 3.2 Hz, 1H), 4.12 (s, OH, 1H), 2.64–2.52 (m, 1H), 2.48–2.41 (m, 1H), 2.34–2.26 (m, 1H), 2.08–2.02 (m, 1H), 1.81–1.78 (m, 1H), 1.66–1.45 (m, 3H), 1.36–1.26 (m, 1H) ppm. <sup>13</sup>C NMR (100 MHz, CDCl<sub>3</sub>):  $\delta = 214.93, 148.49, 147.68, 127.88$  (2C), 123.44 (2C), 73.97, 57.20, 42.66, 30.75,

27.71, 24.69 ppm. HPLC analysis: Chiralpak AD-H (Hexane/*i*-PrOH = 90/10, 1.0 mL/min, 254 nm, 25 °C):  $t_{\text{minor}} = 22.6$  min,  $t_{\text{major}} = 30.9$  min, *ee*: 94%.

**(S)-2-((R)-Hydroxy(phenyl)methyl)cyclohexanone (Table 3, entry 1)<sup>1</sup>**

<sup>1</sup>H NMR (400 MHz, CDCl<sub>3</sub>):  $\delta = 7.34\text{--}7.24$  (m, 5H), 4.76 (d, *J* = 9.16 Hz, 1H), 3.96 (brs, 1H), 2.63–2.56 (m, 1H), 2.44–2.43 (m, 1H), 2.37–2.29 (m, 1H), 2.09–2.02 (m, 1H), 1.77–1.73 (m, 1H), 1.66–1.46 (m, 3H), 1.32–1.23 (m, 1H) ppm. HPLC analysis: Chiralpak AD-H (Hexane/ *i*-PrOH = 97/3, 1.0 mL/min, 222 nm, 25 °C):  $t_{\text{minor}} = 32.3$  min,  $t_{\text{major}} = 33.6$  min, *ee*: 98%.

**(S)-2-((R)-Hydroxy(naphthyl)methyl)cyclohexanone (Table 3, entry 2)<sup>1</sup>**

<sup>1</sup>H NMR (400 MHz, CDCl<sub>3</sub>):  $\delta = 8.23$  (d, *J* = 7.63 Hz, 1H), 7.89–7.74 (m, 2H), 7.55–7.43 (m, 4H), 5.57 (d, *J* = 9.16 Hz, 1H), 3.01–3.94 (m, 1H), 2.51–2.32 (m, 2H), 2.04–2.02 (m, 1H), 1.69–1.63 (m, 2H), 1.44–1.24 (m, 3H) ppm. HPLC analysis: Chiralcel OD-H (Hexane/*i*-PrOH = 90/10, 0.5 mL/min, 280 nm, 25 °C):  $t_{\text{minor}} = 28.4$  min,  $t_{\text{major}} = 30.5$  min, *ee*: 93%.

**(S)-2-((R)-Hydroxy(2-nitro-phenyl)methyl)cyclohexanone (Table 3, entry 3)<sup>1</sup>**

<sup>1</sup>H NMR (400 MHz, CDCl<sub>3</sub>):  $\delta = 7.77$  (d, *J* = 6.87 Hz, 1H), 7.69 (d, *J* = 7.63 Hz, 1H), 7.57 (t, *J* = 7.63 Hz, 1H), 7.37 (t, *J* = 6.87 Hz, 1H), 5.38 (d, *J* = 6.87 Hz, 1H), 4.13 (brs, OH, 1H), 2.72–2.66 (m, 1H), 2.37–2.26 (m, 2H), 2.02–2.01 (m, 1H), 1.67–1.56 (m, 5H) ppm. HPLC analysis: Chiralcel OD-H (Hexane/*i*-PrOH = 95/5, 1.0 mL/min, 254 nm, 25 °C):  $t_{\text{major}} = 16.0$  min,  $t_{\text{minor}} = 18.4$  min, *ee*: 97%.

**(S)-2-((R)-Hydroxy(2-fluoro-phenyl)methyl)cyclohexanone (Table 3, entry 4)<sup>1</sup>**

<sup>1</sup>H NMR (400 MHz, CDCl<sub>3</sub>):  $\delta = 7.49\text{--}7.42$  (m, 1H), 7.24–7.08 (m, 2H), 6.96 (t, *J* = 9.92 Hz, 1H), 5.15 (d, *J* = 8.39 Hz, 1H), 4.03 (brs, OH, 1H), 2.67–2.60 (m, 1H), 2.44–2.26 (m, 2H), 2.04–2.02 (m, 1H), 1.81–1.74 (m, 1H), 1.65–1.38 (m, 4H) ppm. HPLC analysis: Chiralcel OD-H (Hexane/ *i*-PrOH = 90/10, 1.0 mL/min, 220 nm, 25 °C):  $t_{\text{major}} = 6.4$  min,  $t_{\text{minor}} = 7.7$  min, *ee*: 91%.

**(S)-2-((R)-Hydroxy(4-fluoro-phenyl)methyl)cyclohexanone (Table 3, entry 5)<sup>1</sup>**

<sup>1</sup>H NMR (400 MHz, CDCl<sub>3</sub>):  $\delta = 7.30\text{--}7.24$  (m, 2H), 7.05–6.99 (m, 2H), 4.76 (d, *J* = 8.39 Hz, 1H), 4.03 (brs, OH, 1H), 2.59–2.30 (m, 3H), 2.11–2.05 (m, 1H), 2.80–2.77 (m, 1H), 1.67–1.51 (m, 3H), 1.31–1.21 (m, 1H) ppm. HPLC analysis: Chiralcel OD-H (Hexane/ *i*-PrOH = 95/5, 1.0 mL/min, 254 nm, 25 °C):  $t_{\text{major}} = 11.3$  min,  $t_{\text{minor}} = 17.1$  min, *ee*: 93%.

**(S)-2-((R)-Hydroxy(2-chloro-phenyl)methyl)cyclohexanone (Table 3, entry 6)<sup>1</sup>**

<sup>1</sup>H NMR (400 MHz, CDCl<sub>3</sub>):  $\delta = 7.50$  (dd, *J* = 7.63, 1.53 Hz, 1H), 7.24–7.19 (m, 2H), 7.13–7.09 (m, 1H), 5.26 (d, *J* = 7.93 Hz, 1H), 2.62–2.56 (m, 1H), 2.39–2.21 (m, 2H), 1.98–1.96 (m, 1H), 1.73–1.70 (m, 1H), 1.65–1.43 (m, 3H), 1.21–1.17 (m, 1H) ppm. HPLC analysis: Chiralcel OD-H (Hexane/ *i*-PrOH = 92/8, 0.5 mL/min, 220 nm, 25 °C):  $t_{\text{major}} = 14.2$  min,  $t_{\text{minor}} = 16.5$  min, *ee*: 97%.

**(S)-2-((R)-Hydroxy(4-chloro-phenyl)methyl)cyclohexanone (Table 3, entry 7)<sup>1</sup>**

<sup>1</sup>H NMR (400 MHz, CDCl<sub>3</sub>):  $\delta = 7.58$  (d, *J* = 7.63 Hz, 2H), 7.42 (d, *J* = 8.39 Hz, 2H), 4.82 (d, *J* = 8.39 Hz, 1H), 4.03 (brs, 1H), 2.60–2.54 (m, 1H), 2.49–1.39 (m, 1H), 2.38–2.30 (m, 1H), 2.11–2.06 (m, 1H), 1.81–1.77 (m, 1H), 1.66–1.51 (m, 3H), 1.37–1.23 (m, 1H) ppm. HPLC analysis: Chiralpak

AD-H (Hexane/ *i*-PrOH = 90/10, 1.0 mL/min, 222 nm, 25 °C):  $t_{\text{minor}} = 13.1$  min,  $t_{\text{major}} = 15.8$  min, *ee*: 91%.

**(S)-2-((R)-Hydroxy(2-bromo-phenyl)methyl)cyclohexanone (Table 3, entry 8)<sup>1</sup>**

<sup>1</sup>H NMR (400 MHz, CDCl<sub>3</sub>):  $\delta = 7.49\text{--}7.32$  (m, 2H), 7.32 (t,  $J = 7.63$  Hz, 1H), 7.12–7.08 (m, 1H), 5.27 (d,  $J = 8.39$  Hz, 1H), 4.08 (brs, OH, 1H), 2.69–2.62 (m, 1H), 2.42–2.29 (m, 2H), 2.07–2.04 (m, 1H), 1.86–1.75 (m, 2H), 1.73–1.46 (m, 3H) ppm. HPLC analysis: Chiralpak AD-H (Hexane/ *i*-PrOH = 90/10, 1.0 mL/min, 220 nm, 25 °C):  $t_{\text{major}} = 10.5$  min,  $t_{\text{minor}} = 12.2$  min, *ee*: 97%.

**(S)-2-((R)-Hydroxy(4-bromo-phenyl)methyl)cyclohexanone (Table 3, entry 9)<sup>1</sup>**

<sup>1</sup>H NMR (400 MHz, CDCl<sub>3</sub>):  $\delta = 7.44$  (d,  $J = 8.39$  Hz, 2H), 7.17 (d,  $J = 6.87$  Hz, 2H), 4.72 (d,  $J = 8.39$  Hz, 1H), 3.97 (brs, OH, 1H), 2.56–2.43 (m, 2H), 2.38–2.28 (m, 1H), 2.07–2.04 (m, 1H), 1.83–1.53 (m, 4H), 1.31–1.20 (m, 1H) ppm. HPLC analysis: Chiralpak AD-H (Hexane/ *i*-PrOH = 90/10, 0.3 mL/min, 222 nm, 25 °C):  $t_{\text{minor}} = 45.7$  min,  $t_{\text{major}} = 54.6$  min, *ee*: 98%.

**(S)-2-((R)-Hydroxy(2-methoxy-phenyl)methyl)cyclohexanone (Table 3, entry 10)<sup>1</sup>**

<sup>1</sup>H NMR (400 MHz, CDCl<sub>3</sub>):  $\delta = 7.39$  (dd,  $J = 7.63, 1.53$  Hz, 1H), 7.26–7.21 (m, 1H), 6.96 (t,  $J = 7.63$  Hz, 1H), 6.84 (d,  $J = 8.39$  Hz, 1H), 5.24 (d,  $J = 8.39$  Hz, 1H), 3.82 (s, 3H), 2.75–2.68 (m, 1H), 2.47–2.32 (m, 2H), 2.06–1.99 (m, 1H), 1.79–1.44 (m, 5H) ppm. HPLC analysis: Chiralpak OD-H (Hexane/ *i*-PrOH = 97/3, 0.5 mL/min, 210 nm, 25 °C):  $t_{\text{major}} = 33.7$  min,  $t_{\text{minor}} = 36.5$  min, *ee*: 91%.

**(S)-2-((R)-Hydroxy(4-methoxy-phenyl)methyl)cyclohexanone (Table 3, entry 11)<sup>1</sup>**

<sup>1</sup>H NMR (400 MHz, CDCl<sub>3</sub>):  $\delta = 7.24\text{--}7.20$  (m, 2H), 6.87–6.85 (m, 2H), 4.73 (d,  $J = 8.54$  Hz, 1H), 3.81 (s, 3H), 2.62–2.55 (m, 1H), 2.45–2.33 (m, 2H), 2.07–2.04 (m, 1H), 1.78–1.54 (m, 3H), 1.30–1.23 (m, 2H) ppm. HPLC analysis: Chiralpak AD-H (Hexane/ *i*-PrOH = 90/10, 1.0 mL/min, 254 nm, 25 °C):  $t_{\text{minor}} = 21.8$  min,  $t_{\text{major}} = 22.7$  min, *ee*: 52%.

**(S)-2-((R)-Hydroxy(2-trifluoromethyl-phenyl)methyl)cyclohexanone (Table 3, entry 12)<sup>1</sup>**

<sup>1</sup>H NMR (400 MHz, CDCl<sub>3</sub>):  $\delta = 7.69$  (d,  $J = 7.63$  Hz, 1H), 7.62–7.52 (m, 2H), 7.39 (t,  $J = 7.63$  Hz, 1H), 5.28 (d,  $J = 8.39$  Hz, 1H), 2.76–2.69 (m, 1H), 2.50–2.31 (m, 2H), 2.09–2.05 (m, 1H), 1.83–1.23 (m, 5H) ppm. HPLC analysis: Chiralcel AD-H (Hexane/ *i*-PrOH = 90/10, 0.5 mL/min, 254 nm, 25 °C):  $t_{\text{major}} = 20.1$  min,  $t_{\text{minor}} = 21.8$  min, *ee*: 99%.

**(S)-2-((R)-Hydroxy(4-trifluoromethyl-phenyl)methyl)cyclohexanone (Table 3, entry 13)<sup>1</sup>**

<sup>1</sup>H NMR (400 MHz, CDCl<sub>3</sub>):  $\delta = 7.58$  (d,  $J = 7.63$  Hz, 2H), 7.42 (d,  $J = 8.39$  Hz, 2H), 4.82 (d,  $J = 8.39$  Hz, 1H), 4.04 (brs, OH, 1H), 2.60–2.29 (m, 3H), 2.10–2.04 (m, 1H), 1.80–1.50 (m, 4H), 1.36–1.22 (m, 1H) ppm. HPLC analysis: Chiralpak AD-H (Hexane/ *i*-PrOH = 90/10, 0.5 mL/min, 230 nm, 25 °C):  $t_{\text{minor}} = 20.2$  min,  $t_{\text{major}} = 25.5$  min, *ee*: 91%.

**2-[Hydroxy(2-nitro-phenyl)methyl]-cyclopentanone (Table 4, Entry 1)<sup>1</sup>**

<sup>1</sup>H NMR (400 MHz, CDCl<sub>3</sub>):  $\delta = 7.97$  (d,  $J = 7.63$  Hz, 1H), 7.87–7.77 (m, 2H), 7.65–7.61 (m, 1.64H), 7.41 (t,  $J = 8.39$  Hz, 1H), 5.89 (d,  $J = 2.29$  Hz, 1H *syn*), 5.42 (d,  $J = 8.39$  Hz, 0.41H *anti*), 2.76–2.69 (m, 1H), 2.51–2.25 (m, 2H), 2.16–2.09 (m, 1H), 2.06–2.00 (m, 2H), 1.73–1.62 (m, 4H) ppm. HPLC analysis: Chiralcel OD-H (Hexane/ *i*-PrOH = 95/5, 1.0 mL/min, 254 nm, 25 °C): *syn*:  $t_{\text{minor}} = 13.1$  min,  $t_{\text{major}} = 17.1$  min, *ee*: 28%; *anti*:  $t_{\text{major}} = 23.7$  min (*S, R*),  $t_{\text{minor}} = 24.8$  min (*R, S*), *ee*: 99%.

### 2-[Hydroxy(4-nitro-phenyl)methyl]-cyclopentanone (Table 4, Entry 2)<sup>1</sup>

<sup>1</sup>H NMR (400 MHz, CDCl<sub>3</sub>):  $\delta$  = 8.19 (d,  $J$  = 6.87 Hz, 3H), 7.50 (t,  $J$  = 7.63 Hz, 4H), 5.40 (d,  $J$  = 3.05 Hz, 1H *syn*), 4.82 (d,  $J$  = 9.16 Hz, 0.74H *anti*), 2.48–2.08 (m, 5H), 2.04–1.87 (m, 2H), 1.79–1.46 (m, 5H) ppm. HPLC analysis Chiralpak AD-H (Hexane/ *i*-PrOH = 90/10, 1.0 mL/min, 254 nm, 25 °C): *syn*:  $t_{\text{major}}$  14.9 min,  $t_{\text{minor}}$  19.5 min, *ee*: 40%; *anti*:  $t_{\text{minor}}$  23.5 min (*R, S*),  $t_{\text{major}}$  25.0 min (*S, R*), *ee*: 66%.

### 2-[Hydroxy(2-fluoro-phenyl)methyl]-cyclopentanone (Table 4, entry 3)<sup>1</sup>

<sup>1</sup>H NMR (400 MHz, CDCl<sub>3</sub>):  $\delta$  = 7.48–7.40 (m, 1H), 7.19–7.10 (m, 1H), 7.04 (t,  $J$  = 7.63 Hz, 1.9H), 6.88 (t,  $J$  = 8.39 Hz, 1H), 5.48 (d,  $J$  = 3.05 Hz, 1H *syn*), 4.99 (d,  $J$  = 9.16 Hz, 0.23 *anti*), 2.49–2.40 (m, 1H), 2.38–2.12 (m, 2H), 2.06–1.97 (m, 1H), 1.93–1.82 (m, 2H), 1.67–1.48 (m, 2.6H) ppm. HPLC analysis Chiralpak AD-H (Hexane/ *i*-PrOH = 90/0, 1 mL/min, 220 nm, 25 °C): *syn*:  $t_{\text{minor}}$  11.5 min,  $t_{\text{major}}$  14.7 min, *ee*: 61%; *anti*:  $t_{\text{major}}$  20.8 (*S, R*) min,  $t_{\text{minor}}$  22.4 min (*R, S*), *ee*: 76%.

### 2-[Hydroxy-(4-fluoro-phenyl)methyl]-cyclopentanone (Table 4, entry 4)<sup>1</sup>

<sup>1</sup>H NMR (400 MHz, CDCl<sub>3</sub>):  $\delta$  = 7.29–7.24 (m, 4H), 6.98 (dd,  $J$  = 9.16, 3.05 Hz, 4H), 5.23 (d,  $J$  = 3.05 Hz, 1H *syn*), 4.65 (d,  $J$  = 9.16 Hz, 1H *anti*), 2.42–2.32 (m, 3H), 2.29–2.04 (m, 1H), 2.00–1.89 (m, 4H), 1.79–1.61 (m, 4H), 1.49–1.41 (m, 2H) ppm. HPLC analysis: Chiralpak AD-H (Hexane/ *i*-PrOH = 90/10, 1.0 mL/min, 222 nm, 25 °C): *syn*:  $t_{\text{major}}$  8.2 min,  $t_{\text{minor}}$  9.8 min, *ee*: 20%; *anti*:  $t_{\text{major}}$  11.0 min (*S, R*),  $t_{\text{minor}}$  12.0 min (*R, S*), *ee*: 82%.

### 2-[Hydroxy-(2-chloro-phenyl)methyl]-cyclohexanone (Table 4, entry 5)<sup>1</sup>

<sup>1</sup>H NMR (400 MHz, CDCl<sub>3</sub>):  $\delta$  = 7.58–7.54 (m, 1H), 7.31–7.24 (m, 3H), 7.21–7.15 (m, 1H), 5.67 (d,  $J$  = 2.29 Hz, 1H *syn*), 5.27 (d,  $J$  = 9.16 Hz, 0.27H *anti*), 2.66–2.62 (m, 1H), 2.55–2.27 (m, 1H), 2.17–2.08 (m, 1H), 2.02–1.93 (m, 3H), 1.77–1.60 (m, 3H) ppm. HPLC analysis ChiralcelOD-H (Hexane/ *i*-PrOH = 95/5, 1.0 mL/min, 222 nm, 25 °C): *syn*:  $t_{\text{minor}}$  7.5 min,  $t_{\text{major}}$  8.6 min *ee*: 45%; *anti*:  $t_{\text{major}}$  12.0 min (*S, R*),  $t_{\text{minor}}$  12.5 min (*R, S*), *ee*: 99%.

### 2-[Hydroxy-(4-chloro-phenyl)methyl]-cyclohexanone (Table 4, entry 6)<sup>1</sup>

<sup>1</sup>H NMR (400 MHz, CDCl<sub>3</sub>):  $\delta$  = 7.44–7.21 (m, 6.37H), 5.23 (d,  $J$  = 3.05 Hz, 0.62H *syn*), 4.66 (d,  $J$  = 8.39 Hz, 1H *anti*), 2.93–2.28 (m, 1H), 2.43–2.32 (m, 3H), 2.05–1.89 (m, 3H), 1.77–1.61 (m, 3H), 1.47–1.42 (m, 1H), ppm. HPLC analysis Chiralpak AD-H (Hexane/ *i*-PrOH = 90/10, 1.0 mL/min, 222 nm, 25 °C): *syn*:  $t_{\text{major}}$  8.1 min,  $t_{\text{minor}}$  9.9 min, *ee*: 26%; *anti*:  $t_{\text{major}}$  11.5 min (*S, R*),  $t_{\text{minor}}$  11.2 min (*S, R*), *ee*: 84%.

### 2-[Hydroxy-(2-methoxy-phenyl)methyl]-cyclopentanone (Table 4, entry 7)<sup>1</sup>

<sup>1</sup>H NMR (400 MHz, CDCl<sub>3</sub>):  $\delta$  = 7.42 (d,  $J$  = 7.63 Hz, 1H), 7.25–7.22 (m, 2H), 6.96 (t,  $J$  = 7.63 Hz, 1H), 6.84–6.82 (m, 1H), 5.56 (d,  $J$  = 2.29 Hz, 1H *syn*), 5.18 (d,  $J$  = 11.44 Hz, 0.32H *anti*), 3.85 (s, 0.25H), 3.80 (s, 3H), 2.65–2.58 (m, 1H), 2.54–2.24 (m, 2H), 2.20–2.09 (m, 1H), 2.03–1.91 (m, 2H), 1.74–1.58 (m, 3H) ppm. HPLC analysis Chiralpak AD-H (Hexane/ *i*-PrOH = 95/5, 0.5 mL/min, 222 nm, 25 °C): *syn*:  $t_{\text{major}}$  38.9 min,  $t_{\text{minor}}$  49.2 min, *ee*: 33%; *anti*:  $t_{\text{major}}$  44.1 min (*S, R*), and  $t_{\text{minor}}$  45.0 min (*R, S*), *ee*: 97%.

### 2-[Hydroxy-(4-methoxy-phenyl)methyl]-cyclopentanone (Table 4, entry 8)<sup>1</sup>

<sup>1</sup>H NMR (400 MHz, CDCl<sub>3</sub>):  $\delta$  = 7.57–7.51 (m, 0.7H), 7.24–7.20 (m, 2H), 6.93 (d,  $J$  = 8.54 Hz, 1H), 6.83 (d,  $J$  = 8.54 Hz, 2H), 5.19 (d,  $J$  = 3.66 Hz, 1H *syn*), 4.62 (d,  $J$  = 12.82 Hz, 0.4 *anti*), 3.82 (s,

0.62), 3.76 (s, 3H), 3.05 (m, 1H), 2.45–2.30 (m, 2H), 2.14–2.13 (m, 1H), 2.02–1.88 (m, 2H), 1.86–1.78 (m, 1H), 1.74–1.61 (m, 1H), 1.47–1.22 (m, 2H) ppm. HPLC analysis Chiralpak AD-H (Hexane/*i*-PrOH = 90/10, 1.0 mL/min, 254 nm, 25 °C): *syn*:  $t_{\text{major}}$  13.8 min,  $t_{\text{minor}}$  15.8 min, *ee*: 8%; *anti*:  $t_{\text{major}}$  18.3 min (*S*, *R*), and  $t_{\text{minor}}$  20.0 min (*R*, *S*), *ee*: 86%.

### Typical procedure for continuous use of IL 3 (Table 5)

A mixture of cyclohexanone (310  $\mu$ L, 3 mmol), 4-nitrobenzaldehyde (**10**) (151 mg, 1 mmol), **IL-3** (10.8 mg, 2 mol%), and acetic acid (1.1  $\mu$ L, 2 mol%) was stirred at -15°C temperature for 24 h. After complete consumption of **10** (TLC and HPLC analysis), cyclohexanone (3 mmol) and **10** (1 mmol) were added to the reaction mixture without any additional catalyst or additives. The crude product was obtained after repeating this procedure for another 6 catalytic cycles.

### References

1. G. D. Yadav, S. Singh, *Tetrahedron: Asymmetry* 2015, **26**, 1156–1166.
2. S. V. Kochetkov, A. S. Kucherenko, S. G. Zlotin, *Eur. J. Org. Chem.* 2011, 6128–6133.
3. Recyclable proline based organocatalysts: (a) Y. Wu, Y. Zhang, M. Yu, G. Zhao, S. Wang, *Org. Lett.* 2006, **8**, 4417–4420; (b) D. Front, C. Jimeno, M. A. Pericas, *Org. Lett.*, 2006, **8**, 4653–4655; (c) F. Giacalone, M. Gruttadauria, A. M. Marculescu, R. Noto, *Tetrahedron Lett.*, 2007, **48**, 255–259; (d) S. Luo, X. Mi, L. Zhang, S. Liu, H. Xu, J. P. Cheng, *Tetrahedron* 2007, **63**, 1923–1930; (e) J. Gao, J. Liu, D. Jiang, B. Xiao, Q. Yang, *J. Mol. Catal. A: Chem.*, 2009, **313**, 79–87; (f) S. S. Khan, J. Shah, J. Liebscher, *Tetrahedron* 2010, **66**, 5082–5088; (g) T. Miura, K. Imai, M. Ina, N. Tada, N. Imai, A. Itoh, *Org. Lett.* 2010, **12**, 1620–1623; (h) C. L. Wu, X. K. Fu, S. Li, *Tetrahedron* 2011, **67**, 4283–4290; (i) T. Miura, K. Imai, H. Kasuga, M. Ina, N. Tada, N. Imai, A. Itoh, *Tetrahedron* 2011, **67**, 6340–6346; (j) A. M. Castaneda, B. Poladura, H. R. guez-Solla, C. Concellon, V. Amo, *Org. Lett.*, 2011, **13**, 3032–3035; (k) X. Zhang, W. Zhao, C. Qu, L. Yang, Y. Cui, *Tetrahedron: Asymmetry*, 2012, **23**, 468–473; (l) H. L. Yang, S. W. Li, X. Y. Wang, F. W. Zhang, X. Zhong, Z. P. Dong, J. T. Ma, *J. Mol. Catal. A: Chem.*, 2012, **363–364**, 404–410; (m) A. B. Caballero, G. Guillena, C. Nájera, E. Faggi, R. M. Sebastián, A. Vallribera, *Tetrahedron*, 2013, **69**, 1307–1315; (n) C. Qu, W. Zhao, L. Zhang, Y. Cui, *Chirality*, 2014, **26**, 209–213; (o) D. E. Siyutkin, A. S. Kucherenko, S. G. Zlotin, *Tetrahedron* 2010, **66**, 513–518; (p) V. Gauchot, A. R. Schmitzer, *J. Org. Chem.*, 2012, **77**, 4917–4923 (q) G. Guillena, M. C. Hita, C. Najera, S. F. Viozquez, *J. Org. Chem.*, 2008, **73**, 5933–5943; (r) Y. Yang, Y. H. He, Z. Guan, W. D. Huang, *Adv. Synth. Catal.*, 2010, **352**, 2579–2587. (s) A. Bañón-Caballero, G. Guillena, C. Nájera, *Green Chem.* 2010, **12**, 1599–1606; (t) A. Monge-Marcet, X. Cattoñ, D. A. Alonso, C. Nájera, M. W. C. Man, R. Pleixats, *Green Chem.* 2012, **14**, 1601–1610.

**Table 1:** Comparisons of literature reported recoverable proline and prolinamide catalysts with **IL 3** for direct asymmetric aldol reaction between cyclohexanone and 4-nitrobenzaldehyde.

| Entry | Recoverable organocatalyst Catalyst                                                          | Catalyst Loading, reaction time | Yield (%) ( <i>anti/syn</i> ) | Ee ( <i>anti</i> ) (%) | TON  | TOF (h <sup>-1</sup> ) x 10 <sup>-2</sup> | References |
|-------|----------------------------------------------------------------------------------------------|---------------------------------|-------------------------------|------------------------|------|-------------------------------------------|------------|
| 1     | L-Prolinamide as a Recoverable                                                               | 5 mol%, 30 h                    | 95 (93/7)                     | 96                     | 19   | 63                                        | 3r         |
| 2     | Polymer supported <i>L</i> -prolinamide                                                      | 10 mol%, 96 h                   | 91 (89/11)                    | 87                     | 9.1  | 9.4                                       | 3n         |
| 3     | imidazolium-based chiral proline analogous                                                   | 30 mol%, 2 d                    | 83 (86/14)                    | 86                     | 2.8  | 5.7                                       | 3p         |
| 4     | polyvinylidene chloride-supported ionic liquid/ <i>L</i> -proline                            | 12 mol%, 2 d                    | 99 (94/6)                     | 98                     | 7.2  | 17                                        | 3k         |
| 5     | silica magnetic microspheres supported proline                                               | 20 mol%, 24 h                   | 63 (76/24)                    | 85                     | 4.3  | 13                                        | 3l         |
| 6     | pyrrolidine-type FILs                                                                        | 20 mol%, 12 h                   | 93 (50/50)                    | 10                     | 9.3  | 38.7                                      | 3d         |
| 7     | Guanidinium Salt/Proline                                                                     | 15 mol%, 96 h                   | 92 (92/8)                     | 99                     | 6.1  | 6                                         | 3j         |
| 8     | fluorous <i>b</i> -aminosulfonamide                                                          | 10 mol%, 20 h                   | 82 (80/20)                    | 92                     | 8.2  | 41                                        | 3g, 3i     |
| 9     | IL tagged proline                                                                            | 20 mol%, 24 h                   | 95 (98/2)                     | 98                     | 4.8  | 19.7                                      | 3f         |
| 10    | Silica supported <i>L</i> -prolinamide                                                       | 60 mol%, 4 d                    | 87 (85/15)                    | 96                     | 1.5  | 1.5                                       | 3e         |
| 11    | Dendritic supported <i>N</i> -polylysulfonamide                                              | 10 mol%, 24 h                   | >99 (99/1)                    | >99                    | 9.9  | 41                                        | 3a         |
| 12    | Polystyrene-Supported Hydroxyproline                                                         | 10 mol%, 18 h                   | 85 (98/2)                     | 97                     | 8.5  | 47                                        | 3b         |
| 13    | Polystyrene-Supported <i>L</i> -Proline                                                      | 10 mol%, 22 h                   | 82 (95/5)                     | 98                     | 8.2  | 37                                        | 3c         |
| 14    | Silica-gel supported binam-prolinamides                                                      | 10 mol%, 6 h                    | 86 (94/6)                     | 95                     | 8.6  | 143                                       | 3m         |
| 15    | Recoverable ( <i>S</i> )-Binam- <i>L</i> -Prolinamides                                       | 5 mol%, 2 h                     | 80 (90/10)                    | 86                     | 16   | 800                                       | 3q         |
| 16    | Polystyrene supported <i>N</i> -Sulfonyl-( <i>Ra</i> )-binam- <i>D</i> -prolinamide          | 20 mol%, 24h                    | 83 (95:5)                     | 88                     | 4.4  | 18.3                                      | 3s         |
| 17    | Recyclable silica-supported prolinamide                                                      | 10 mol%, 24h                    | 88 (86/14)                    | 86                     | 8.6  | 35.8                                      | 3t         |
| 18    | O-acylation serine derivatives                                                               | 10 mol%, 20 h                   | 90 (94/6)                     | 98                     | 9.0  | 45                                        | 3h         |
| 19    | ( <i>S</i> )-prolinamide modified by an ionic liquid                                         | 2 mol%, 18 h                    | 98 (99/1)                     | 99                     | 49   | 272                                       | 3o         |
| 20    | (1 <i>R</i> ,2 <i>R</i> )-Bis( <i>S</i> )-prolinamido]cyclohexane Modified with Ionic Groups | 10 mol%, 72 h                   | 72 (92/8)                     | 98                     | 7.2  | 10                                        | 2          |
| 21    | Ionic liquid of <i>trans</i> -4-hydroxy- <i>L</i> -Prolinamide                               | 2 mol%, 24 h                    | 99 (97/3)                     | 94                     | 49.5 | 206                                       | This paper |

$$\text{TOF} = [\text{product}]/[\text{catalyst}][\text{Time}] \quad \text{and} \quad \text{TON} = \text{Product (moles)}/\text{Catalyst (moles)}$$

## Mass spectra

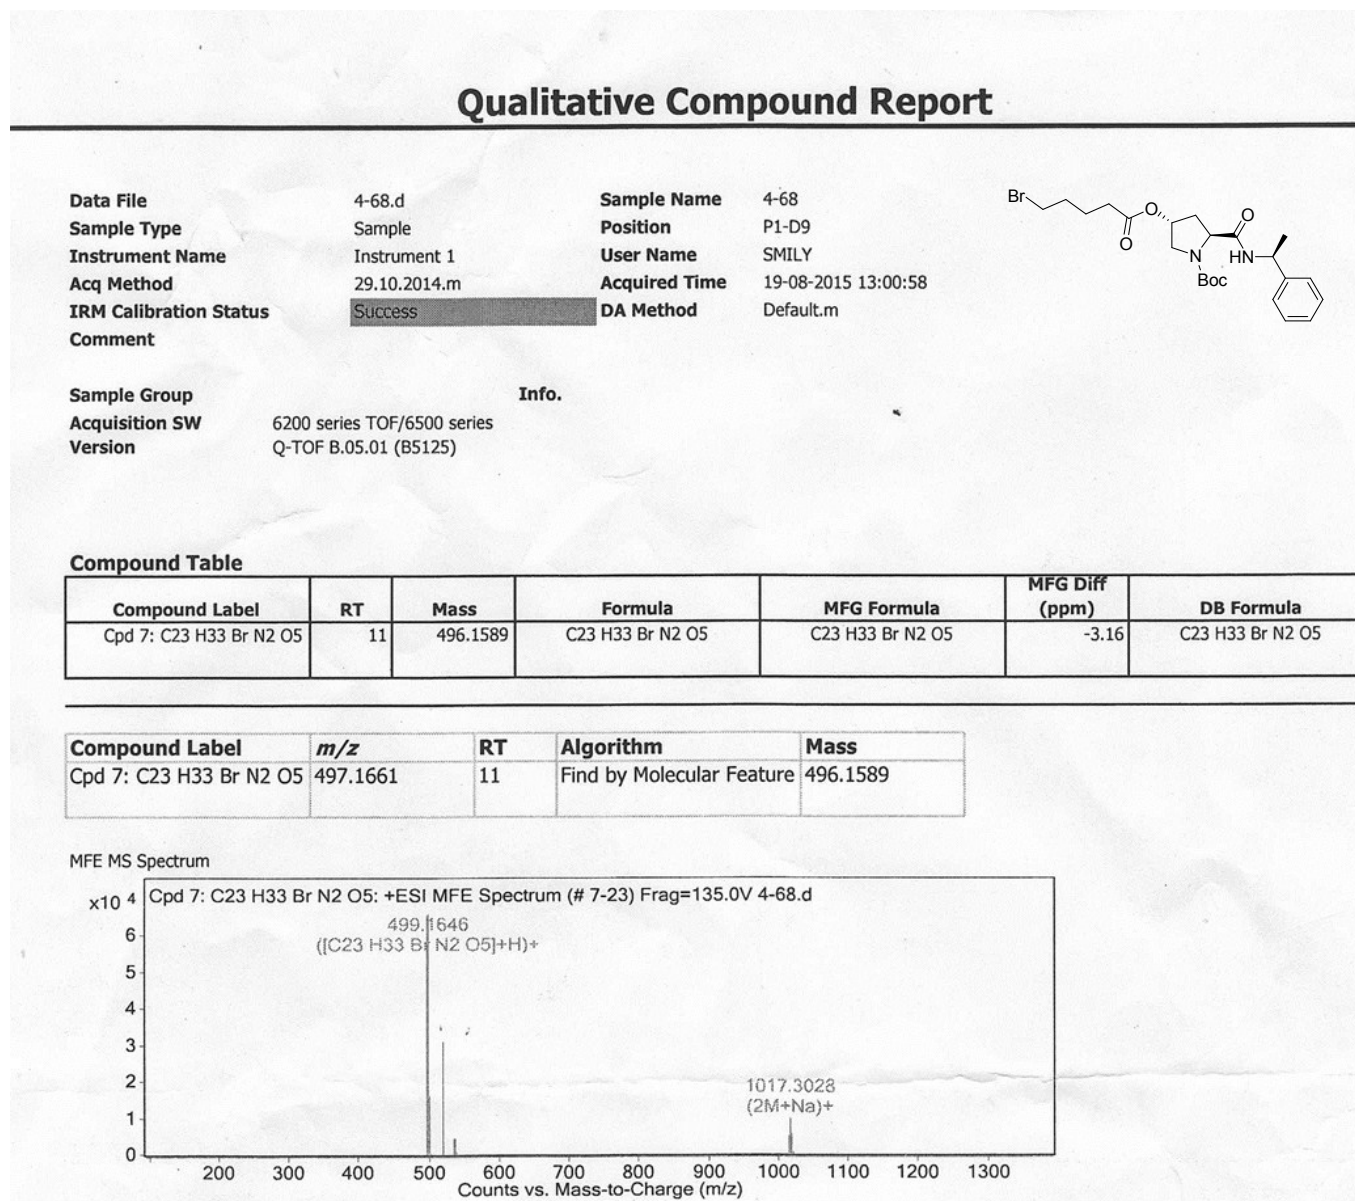

**Figure1:** HRMS of compound 7



# Qualitative Compound Report

|                               |                |                      |                     |
|-------------------------------|----------------|----------------------|---------------------|
| <b>Data File</b>              | GY433.d        | <b>Sample Name</b>   | GY433               |
| <b>Sample Type</b>            | Sample         | <b>Position</b>      | P1C9                |
| <b>Instrument Name</b>        | 6530 QTOF LCMS | <b>User Name</b>     | lcmsdu-PC\admin     |
| <b>Acq Method</b>             | Union.m        | <b>Acquired Time</b> | 21-08-2014 14:28:34 |
| <b>IRM Calibration Status</b> | Success        | <b>DA Method</b>     | Default.m           |
| <b>Comment</b>                |                |                      |                     |

|                       |                             |              |
|-----------------------|-----------------------------|--------------|
| <b>Sample Group</b>   |                             | <b>Info.</b> |
| <b>Acquisition SW</b> | 6200 series TOF/6500 series |              |
| <b>Version</b>        | Q-TOF B.05.01 (B5125)       |              |

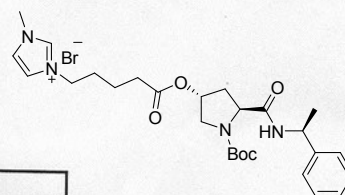

## Compound Table

| Compound Label | RT    | Mass     | MFG Formula |
|----------------|-------|----------|-------------|
| Cpd 1: 0.195   | 0.195 | 498.2843 | <none>      |

| Compound Label | m/z      | RT    | Algorithm                 | Mass     |
|----------------|----------|-------|---------------------------|----------|
| Cpd 1: 0.195   | 499.2916 | 0.195 | Find by Molecular Feature | 498.2843 |

## MFE MS Spectrum

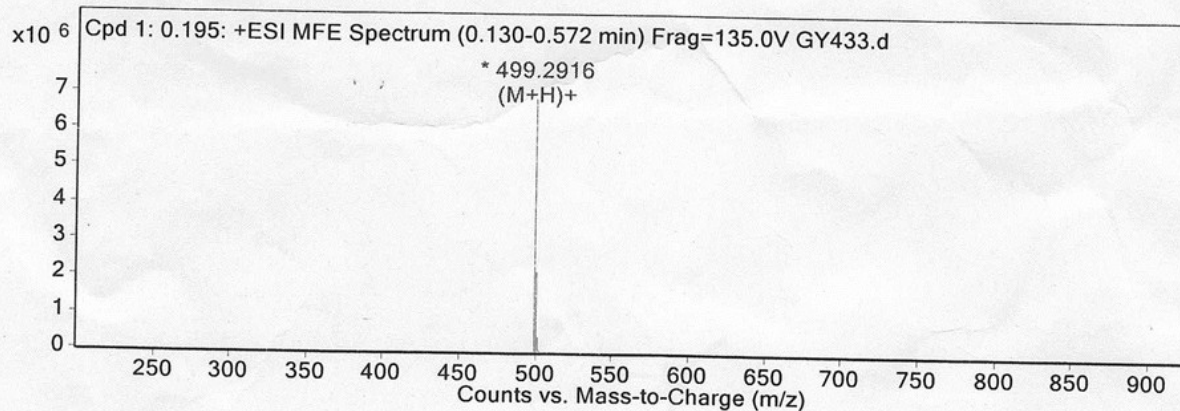

Figure 2: HRMS of compound 8

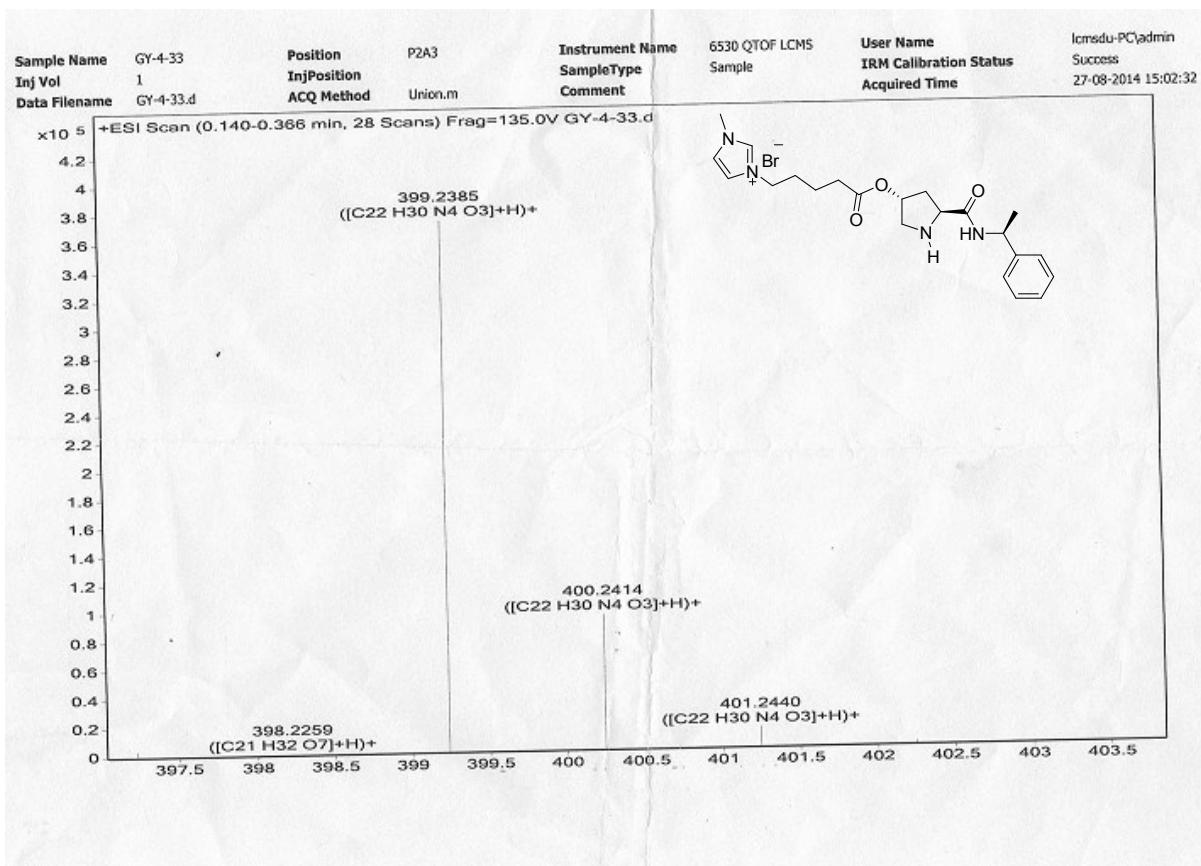

Figure 3: HRMS of IL 2

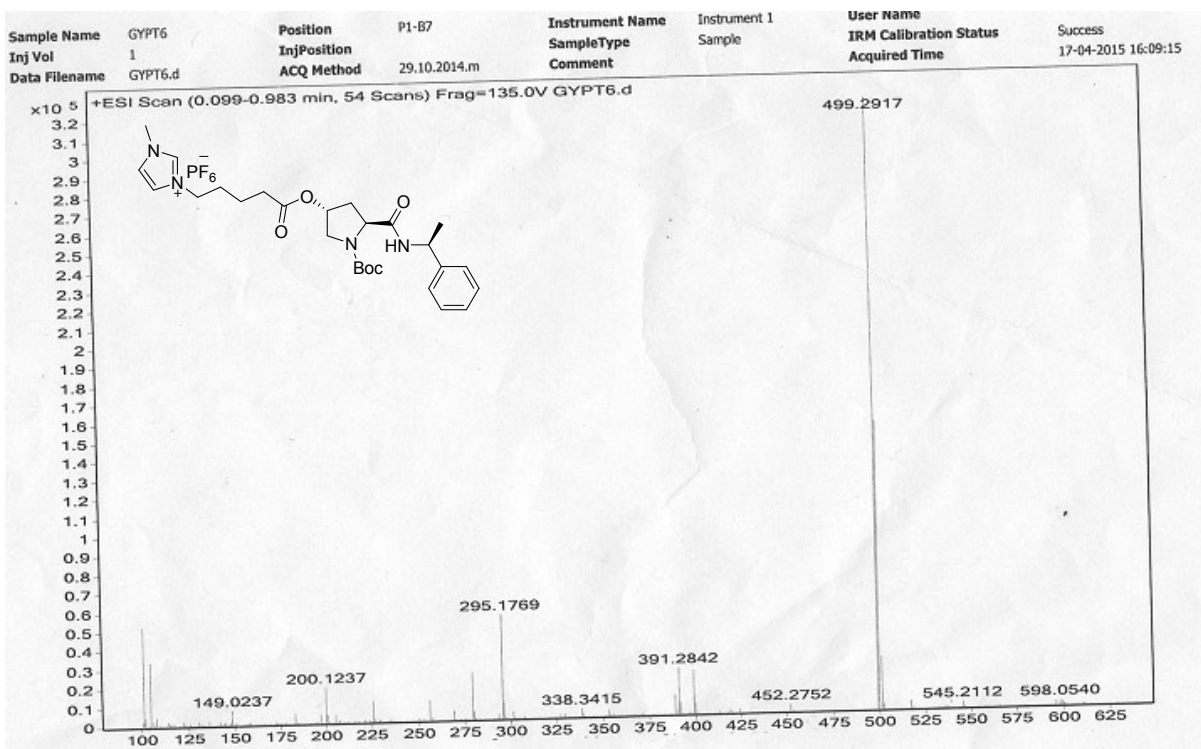

Figure 4: HRMS of compound 9

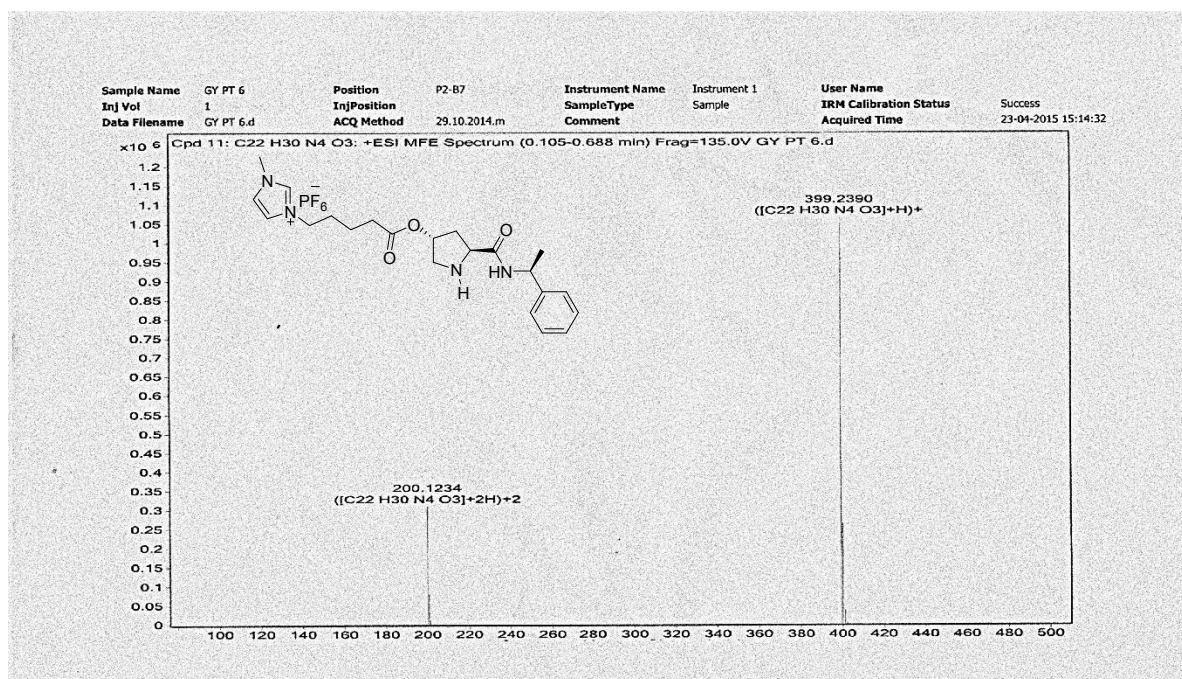

**Figure 5:** HRMS of fresh IL 3

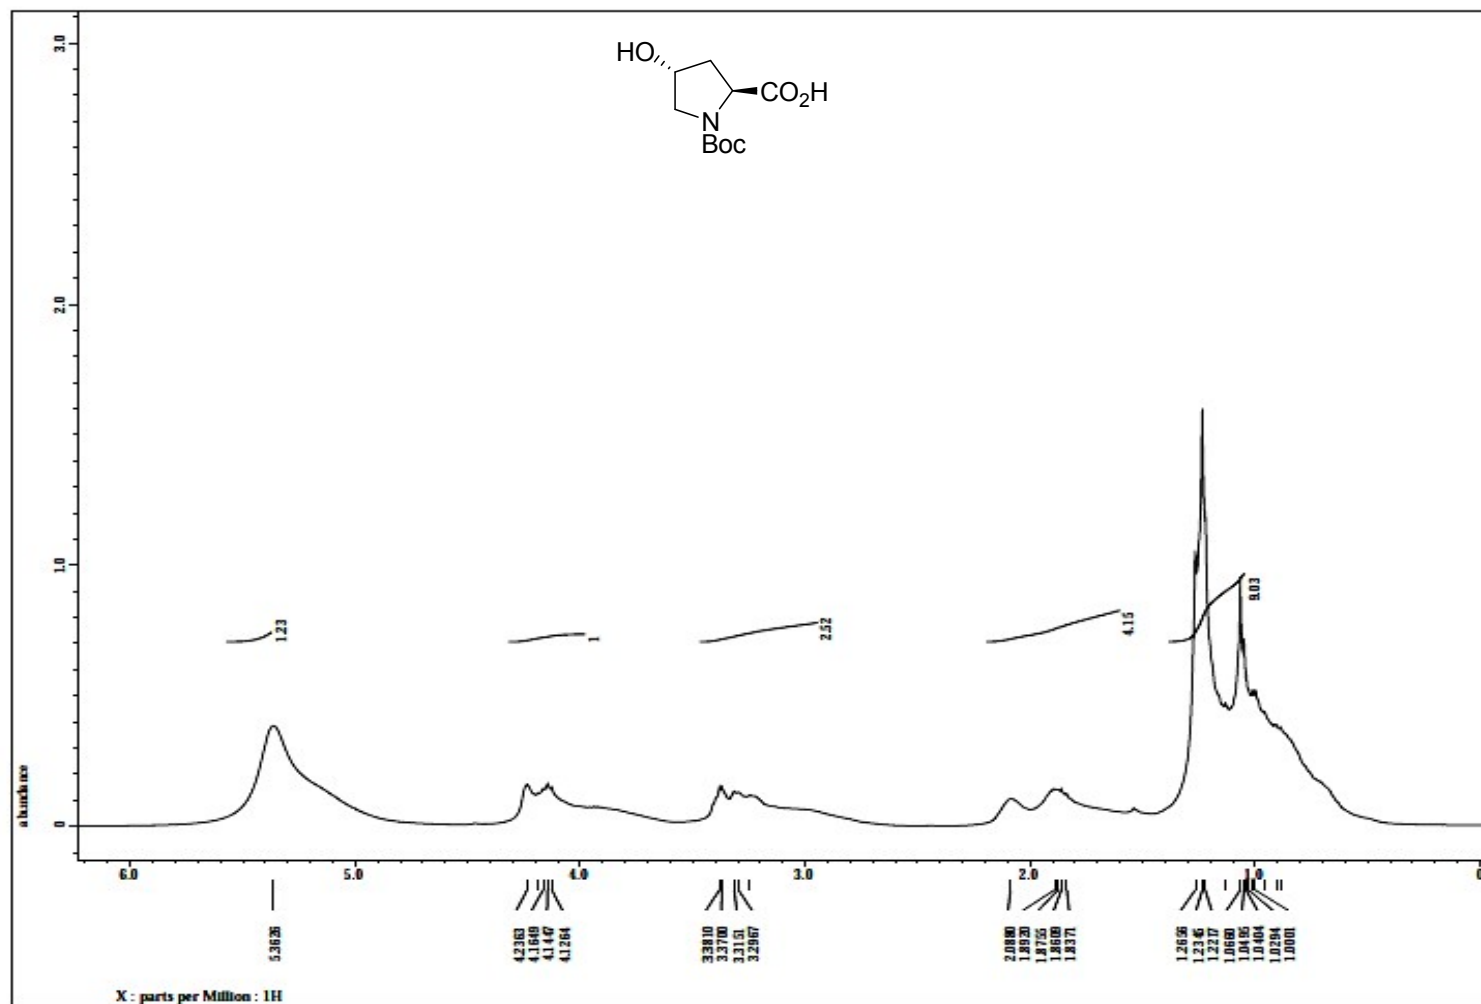

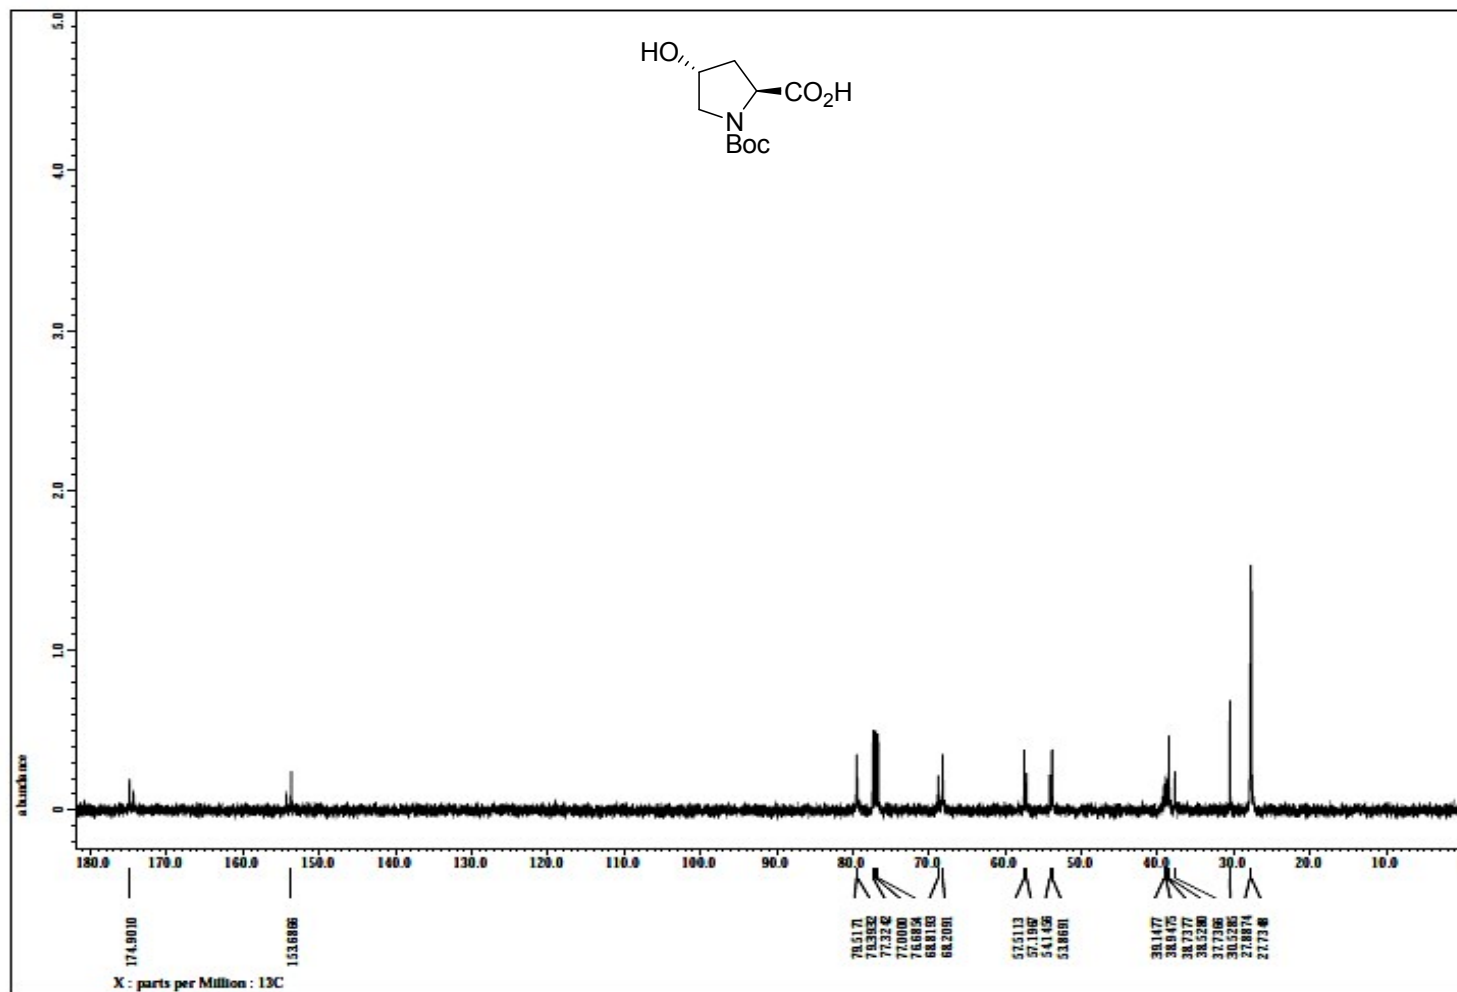

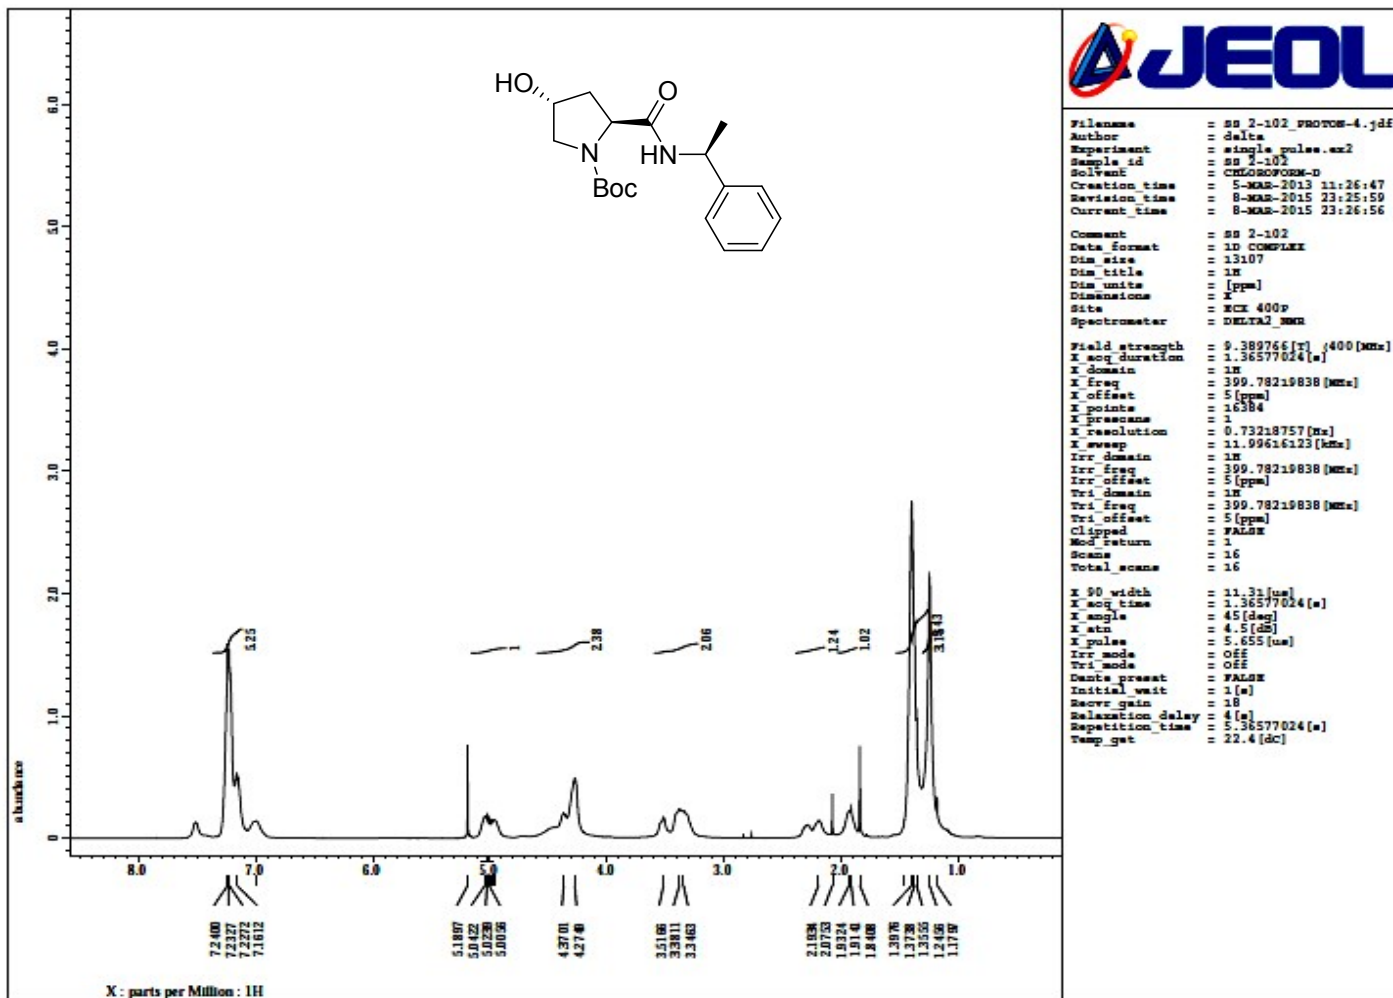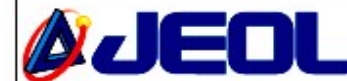

```

Filename      = ss 2-102 PROTON-4.jdf
Author       = delta
Experiment   = single pulsc.exe2
Sample id    = ss 2-102
Solvent      = CHLOROFORM-D
Creation time = 5-MAR-2013 11:26:47
Revision time = 8-MAR-2015 23:25:59
Current time  = 8-MAR-2015 23:26:56

Comment      = ss 2-102
Data format  = 1D COMPLEX
Data size    = 13107
Data title   = 1H
Data units   = [ppm]
Dimensions   = X
Site         = KIX 400P
Spectrometer = DELTA2_NMR

Field strength = 9.389766 [T] (400 MHz)
X acq duration = 1.36577024 [s]
X domain       = 1H
X freq         = 399.78219838 [MHz]
X offset       = 5 [ppm]
X points       = 16384
X prescans     = 1
X resolution   = 0.73218757 [Hz]
X sweep        = 11.99616123 [kHz]
Irr domain    = 1H
Irr freq      = 399.78219838 [MHz]
Irr offset    = 5 [ppm]
Tri domain    = 1H
Tri freq      = 399.78219838 [MHz]
Tri offset    = 5 [ppm]
Clipped       = FALSE
Modf return   = 1
Scans         = 16
Total scans   = 16

X 90 width    = 11.31 [us]
X acq time    = 1.36577024 [s]
X angle       = 45 [deg]
X sbn         = 4.5 [dB]
X pulse       = 5.655 [us]
Irr mode      = OFF
Tri mode      = OFF
Dante preset  = FALSE
Initial wait  = 1 [s]
Recv gain     = 18
Relaxation delay = 4 [s]
Repetition time = 5.36577024 [s]
Temp set      = 22.4 [degC]

```

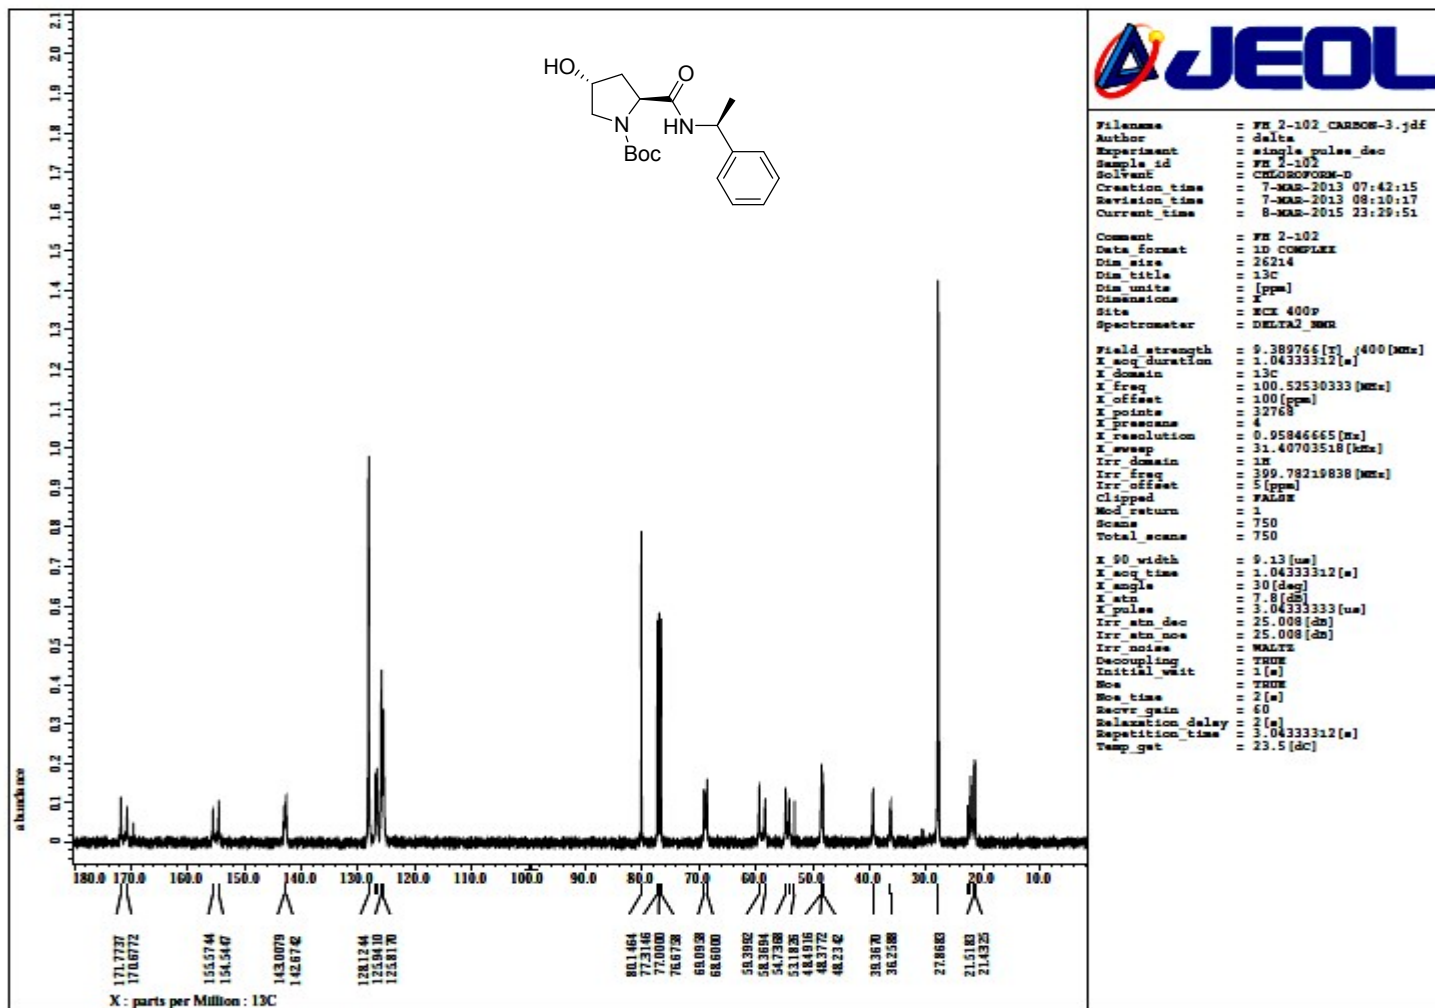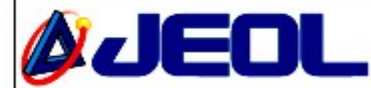

```

Filename      = FH 2-102 CARBON-3.jdf
Author       = delta
Experiment   = single pulse_dec
Sample id    = FH 2-102
Solvent      = CDCl3
Creation time = 7-MAR-2013 07:42:15
Revision time = 7-MAR-2013 08:10:17
Current time  = 8-MAR-2015 23:29:51

Comment      = FH 2-102
Data format  = 1D COMPLEX
Dir size     = 26214
Dir title    = 13C
Dir units    = [ppm]
Dimensions   = 1
Site         = ECI 400P
Spectrometer = DELTA2_MMR

Field strength = 9.389766 [T] (400 [MHz])
X acq duration = 1.04333312 [s]
X domain      = 13C
X freq        = 100.52530333 [MHz]
X offset      = 100 [ppm]
X points      = 32768
X prescans    = 4
X resolution  = 0.95846665 [Hz]
X sweep       = 31.40703518 [kHz]
Irr domain    = 1H
Irr freq      = 399.78219838 [MHz]
Irr offset    = 5 [ppm]
Clipped      = FALSE
Mod return    = 1
Scans        = 750
Total scans   = 750

X 90 width    = 9.13 [us]
X acq time    = 1.04333312 [s]
X angle       = 30 [deg]
X stn         = 7.8 [dB]
X pulse       = 3.04333333 [us]
Irr stn_dec   = 25.008 [dB]
Irr stn_noc   = 25.008 [dB]
Irr noise     = WALTZ
Decoupling    = TRUE
Initial wait  = 1 [s]
Noe           = TRUE
Noe time      = 2 [s]
Recvr gain    = 60
Relaxation delay = 2 [s]
Repetition time = 3.04333312 [s]
Temp_get      = 23.5 [dc]
  
```

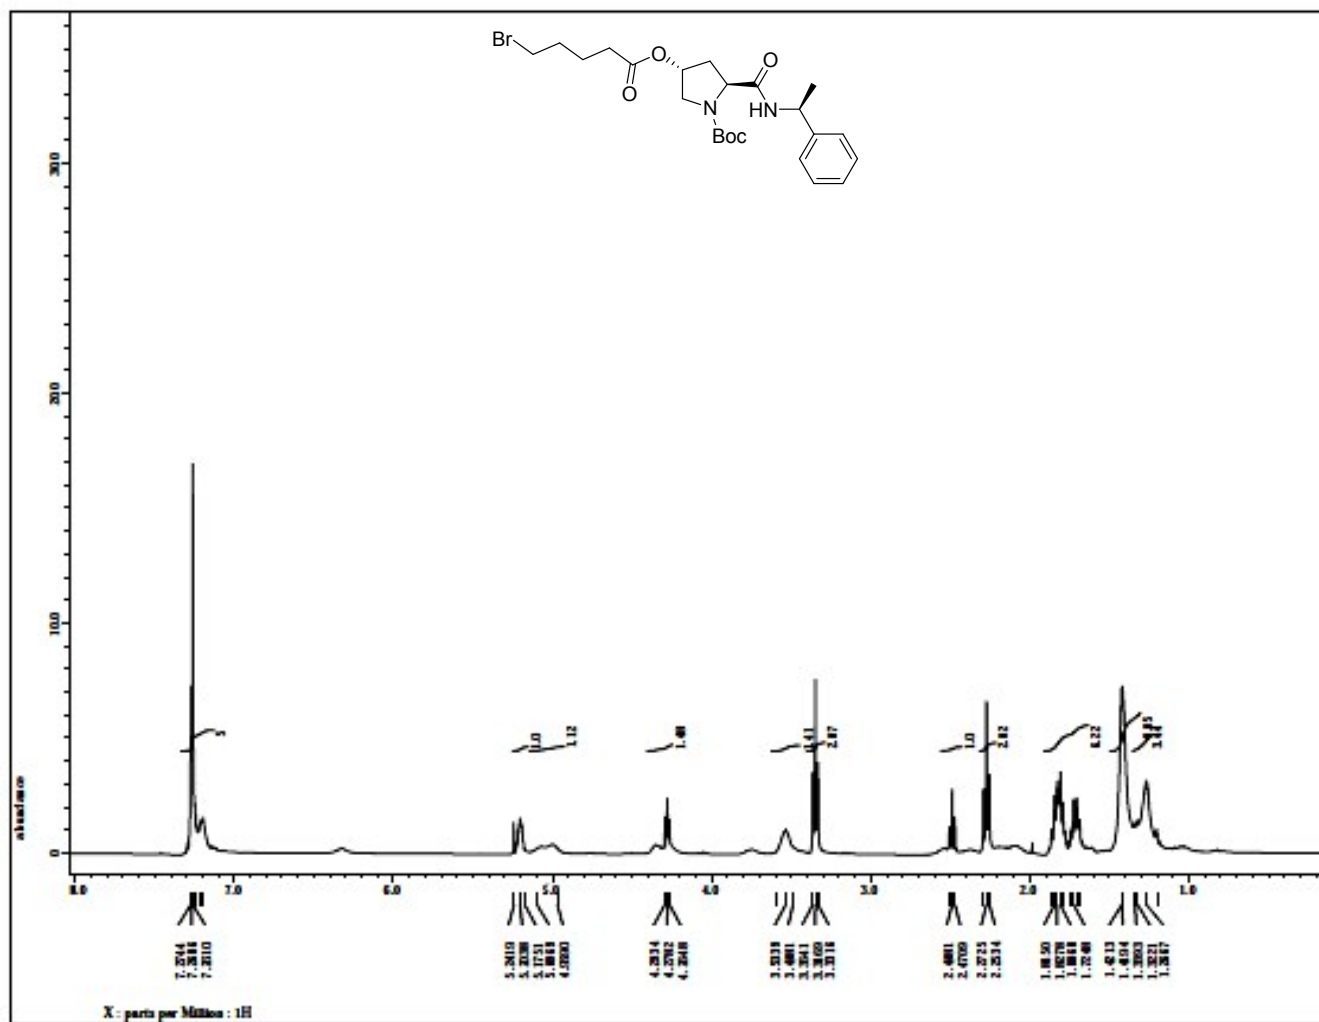



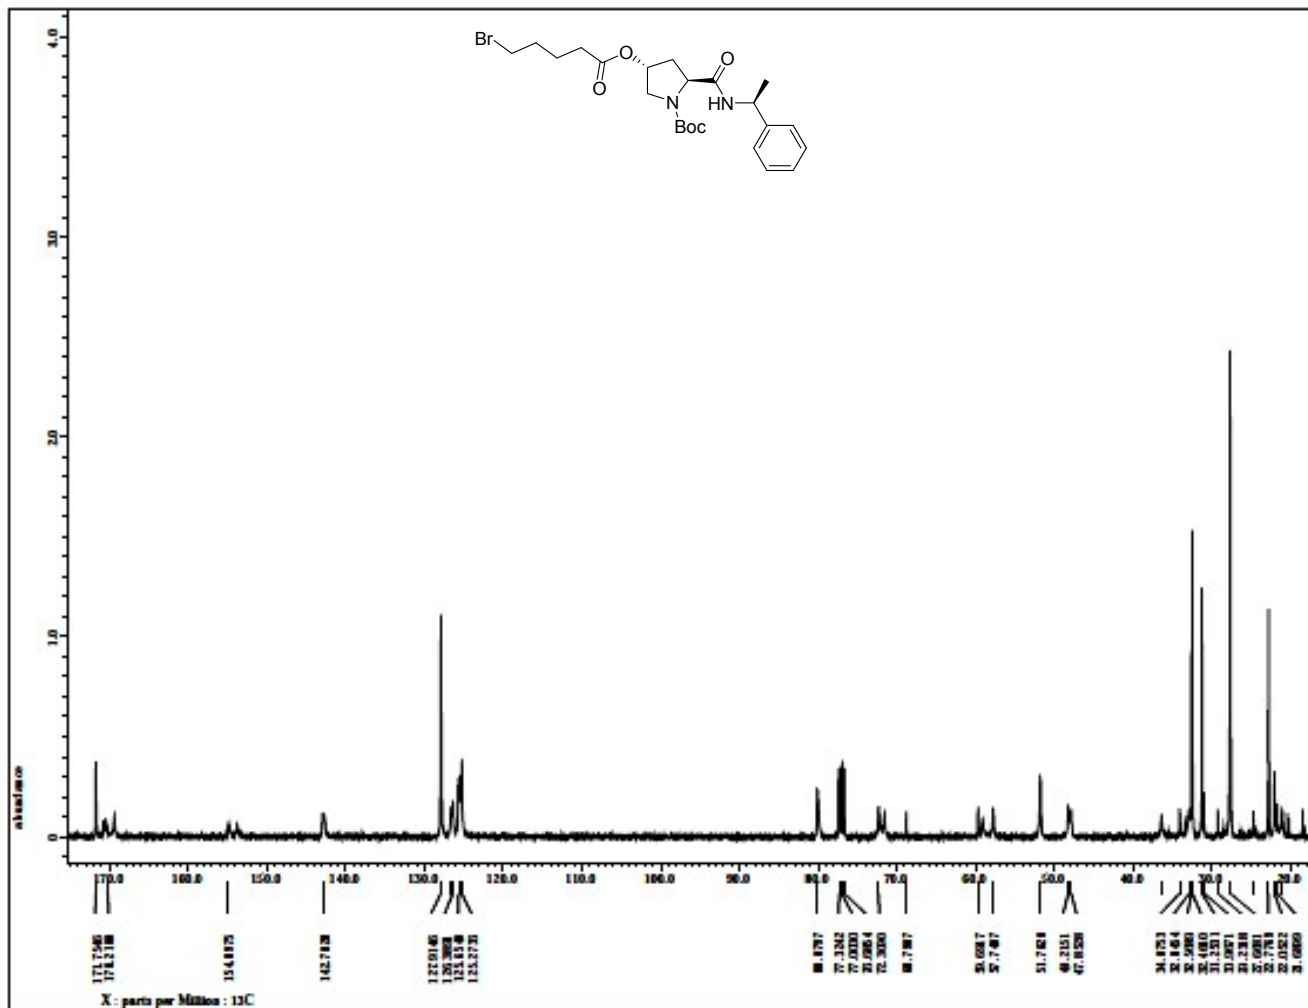

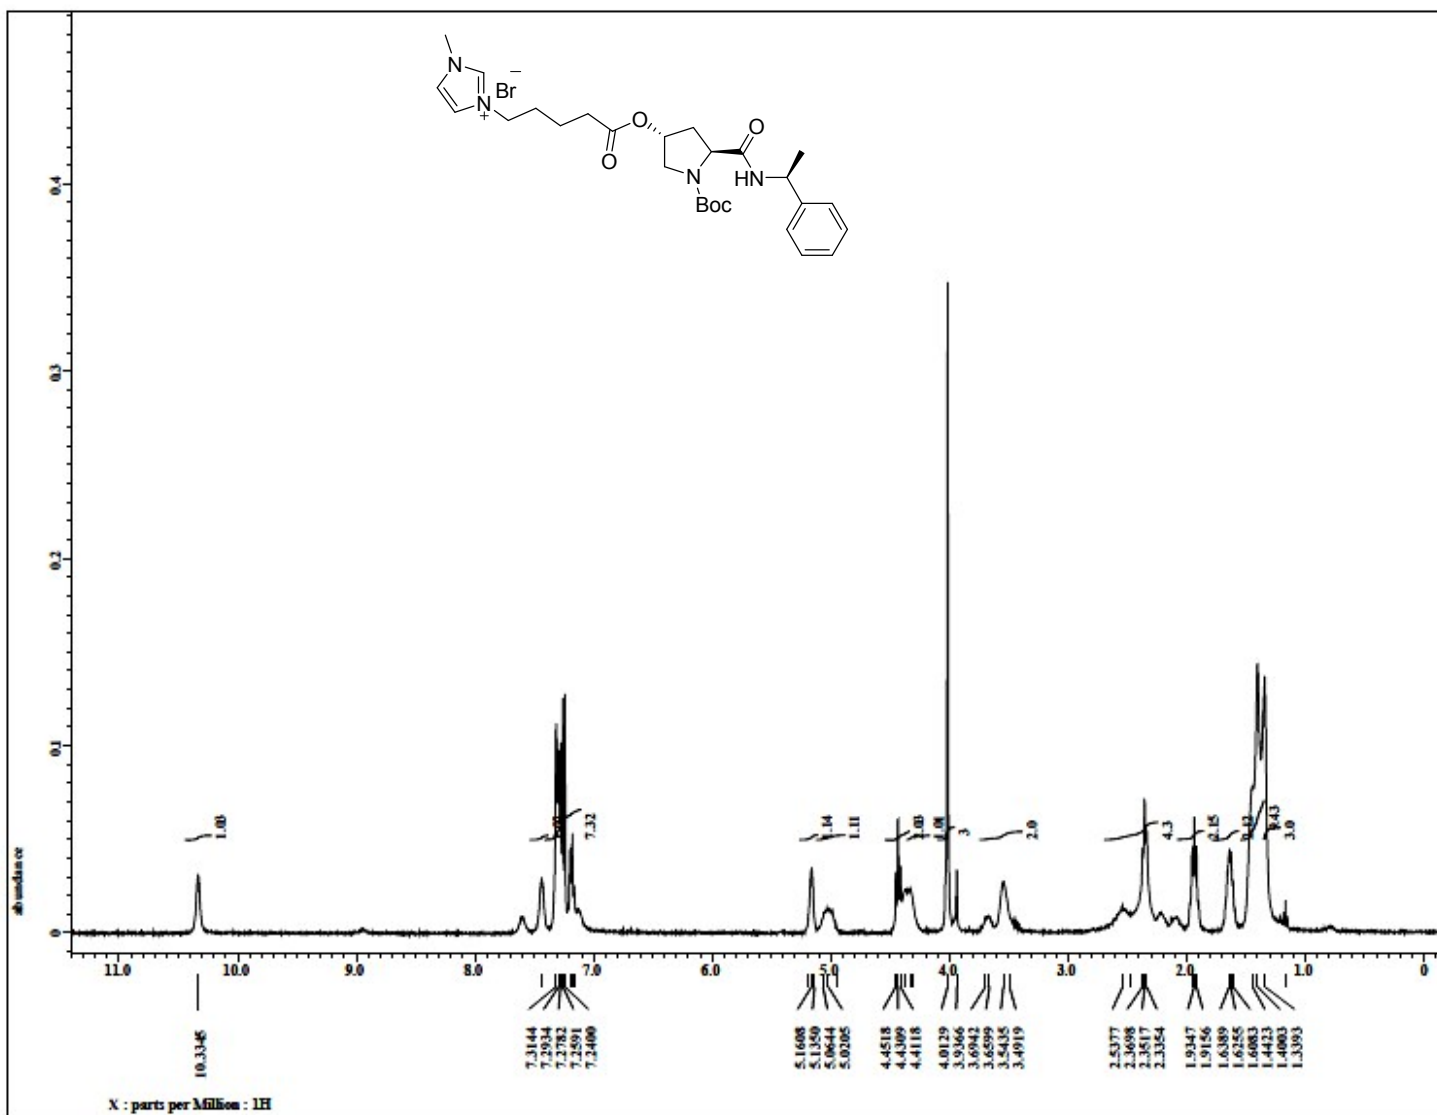

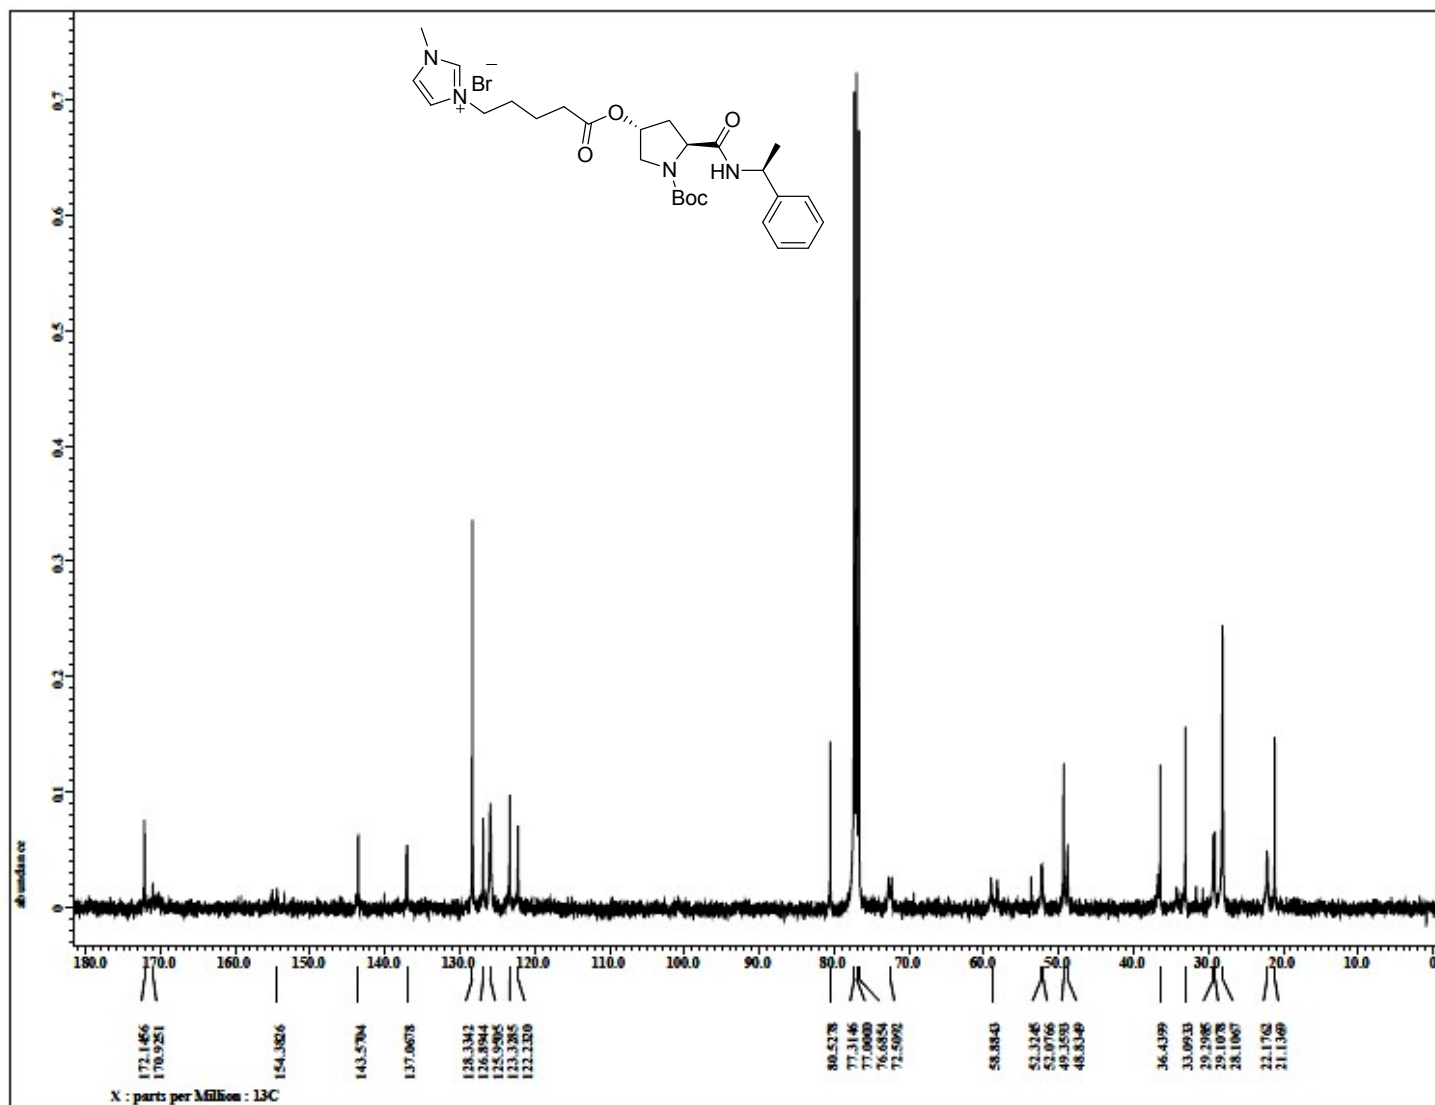

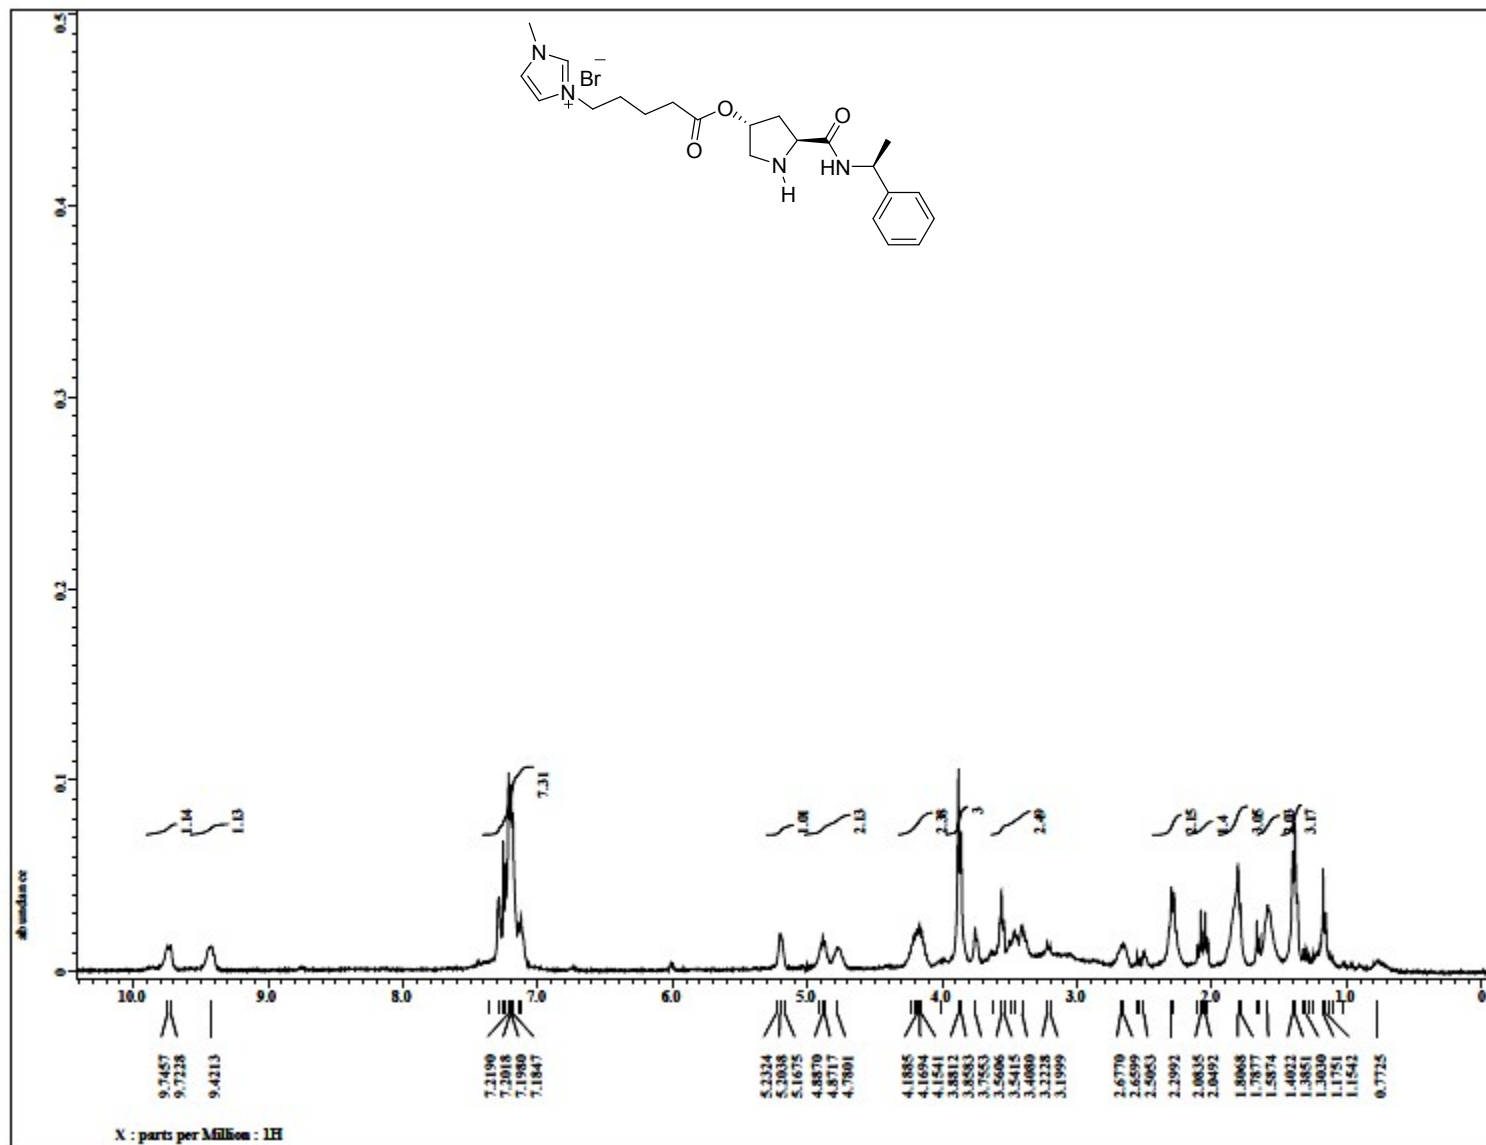

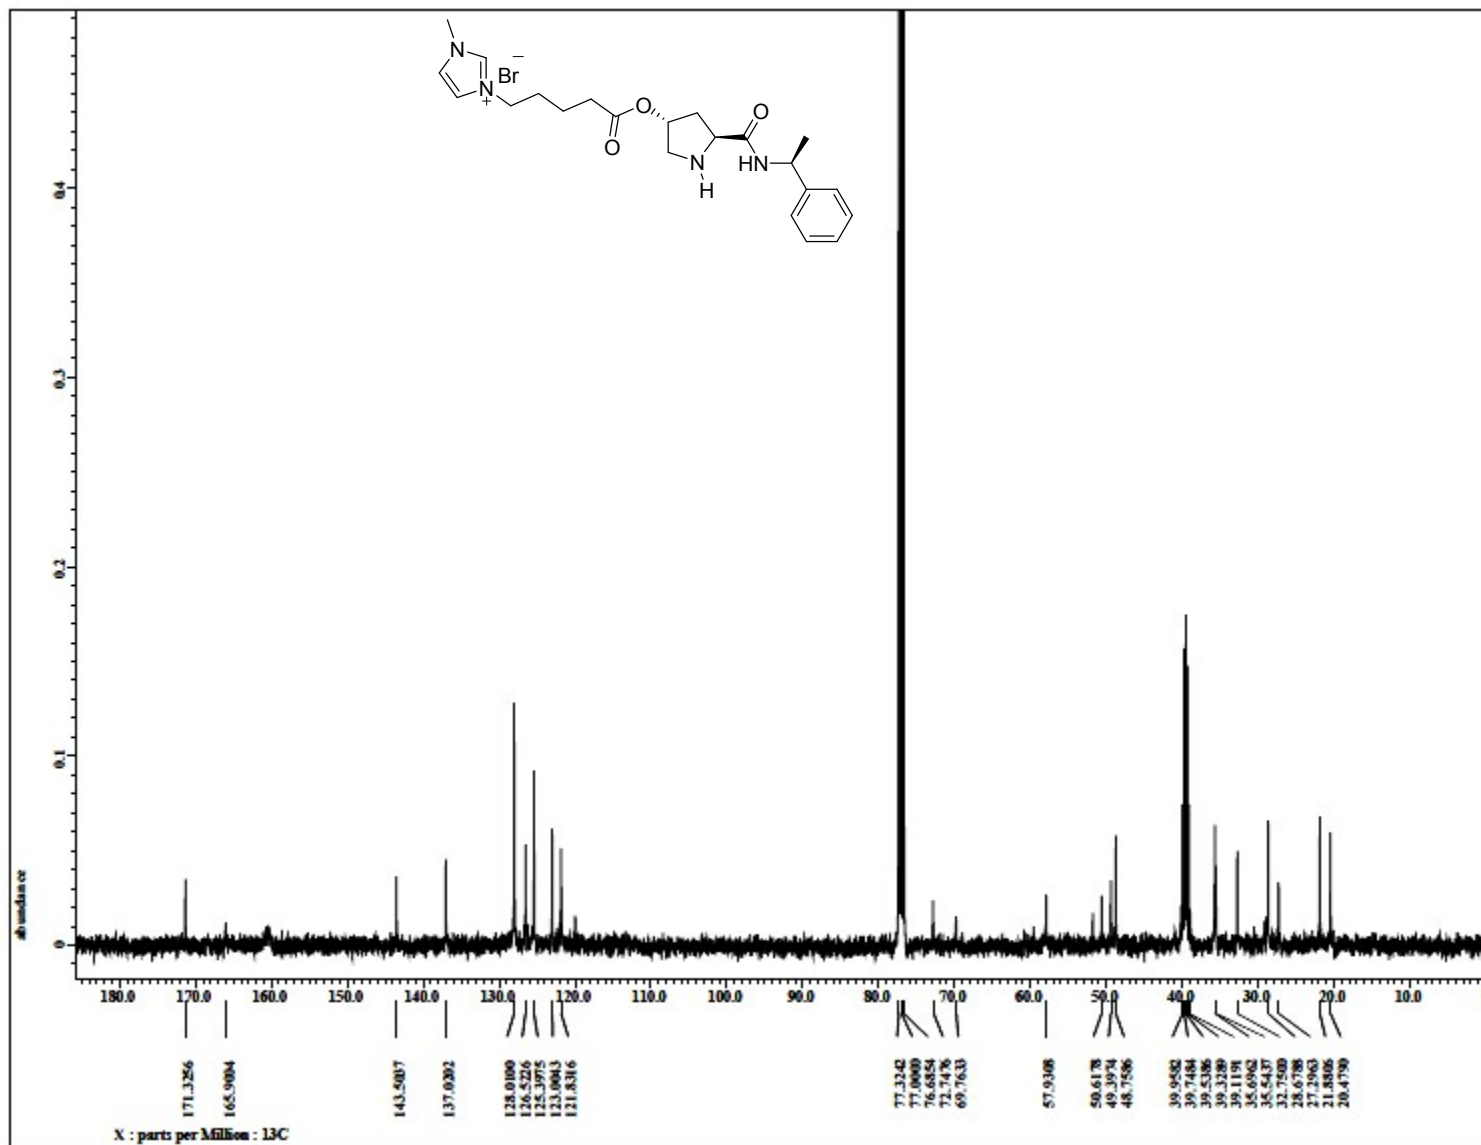

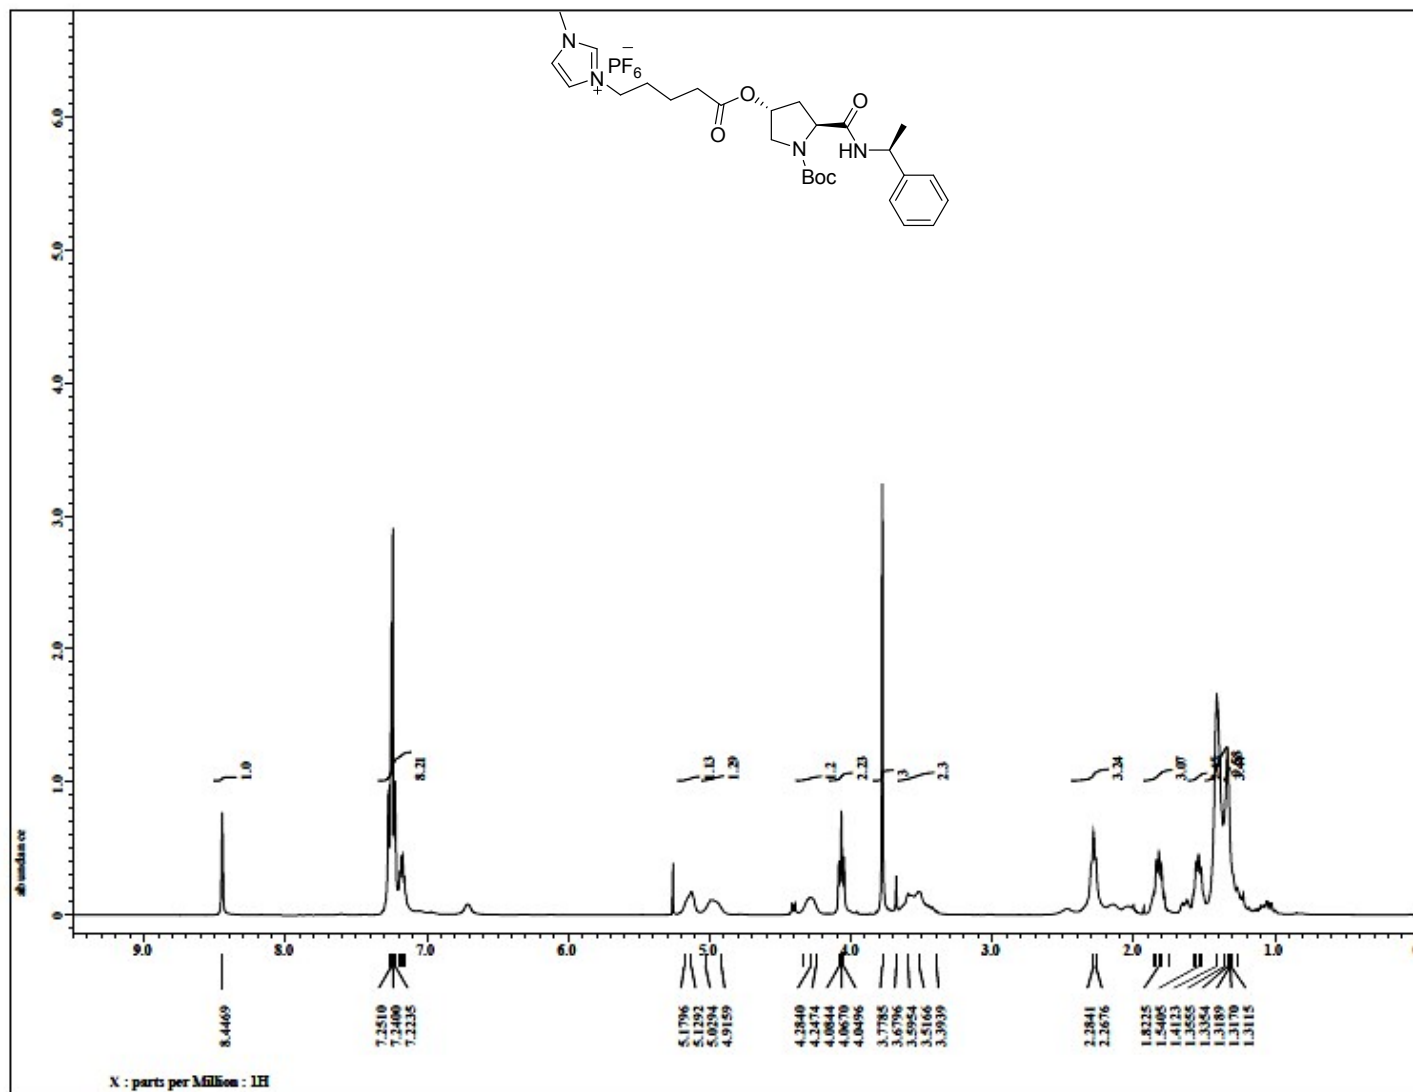

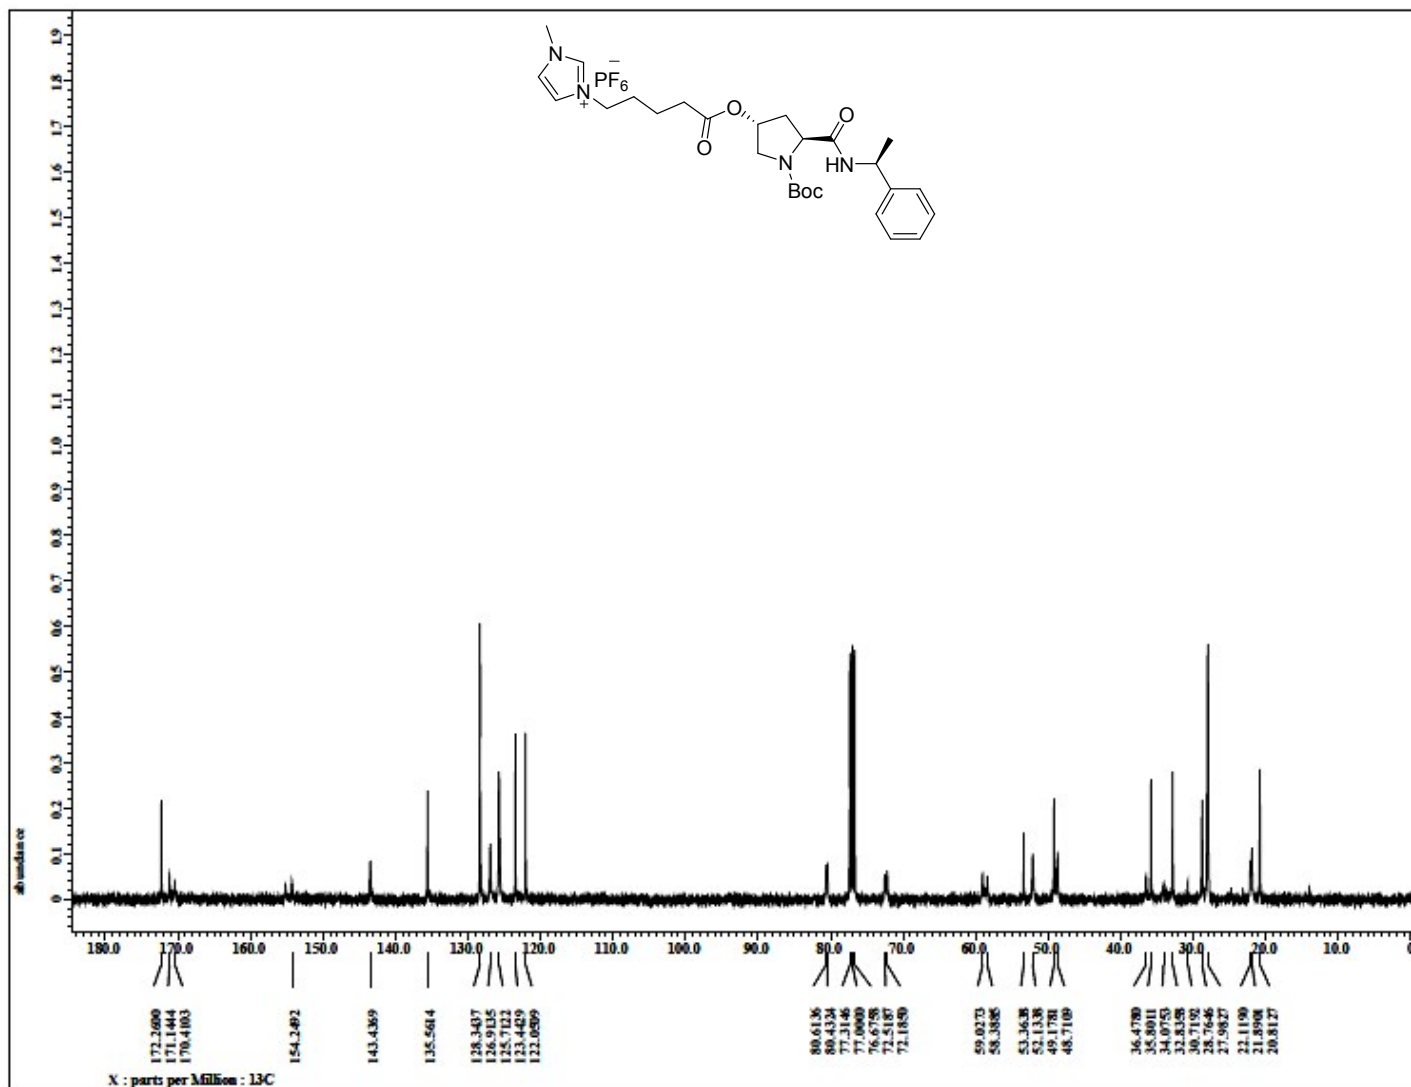

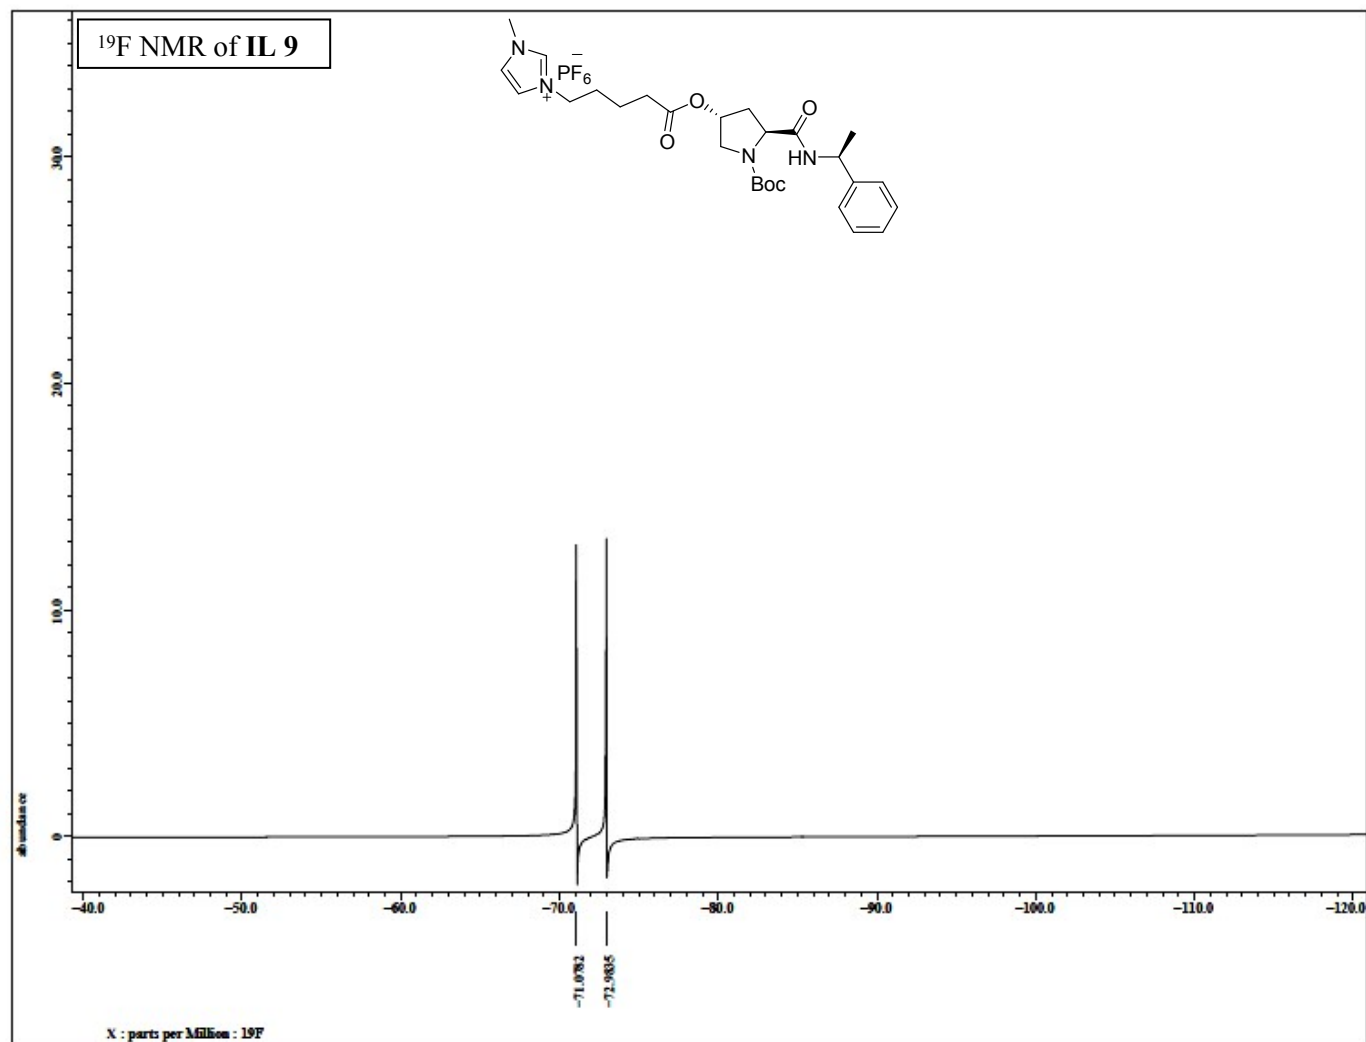



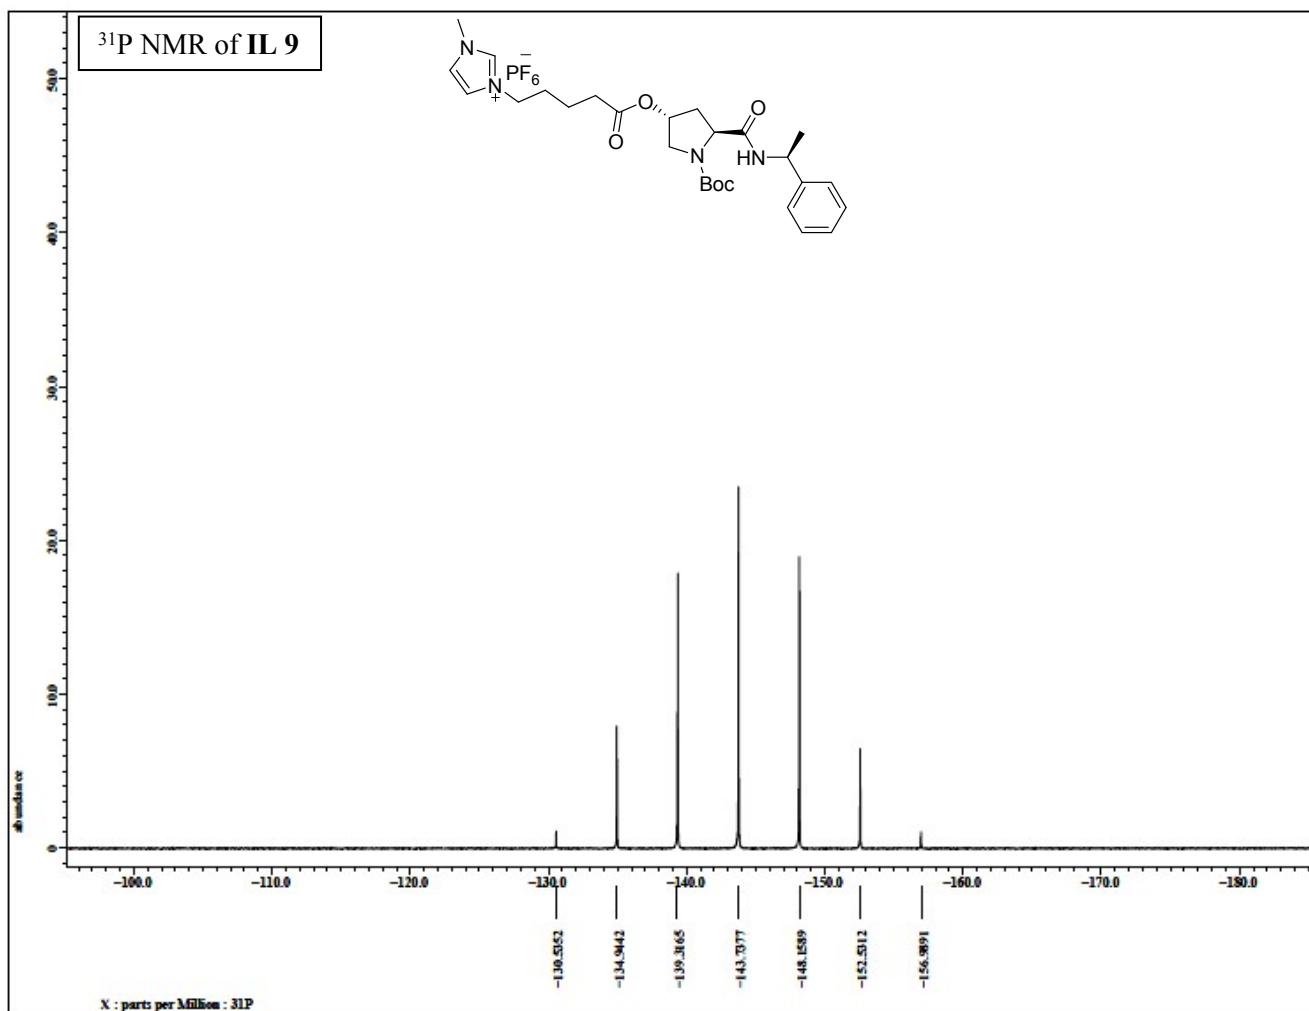

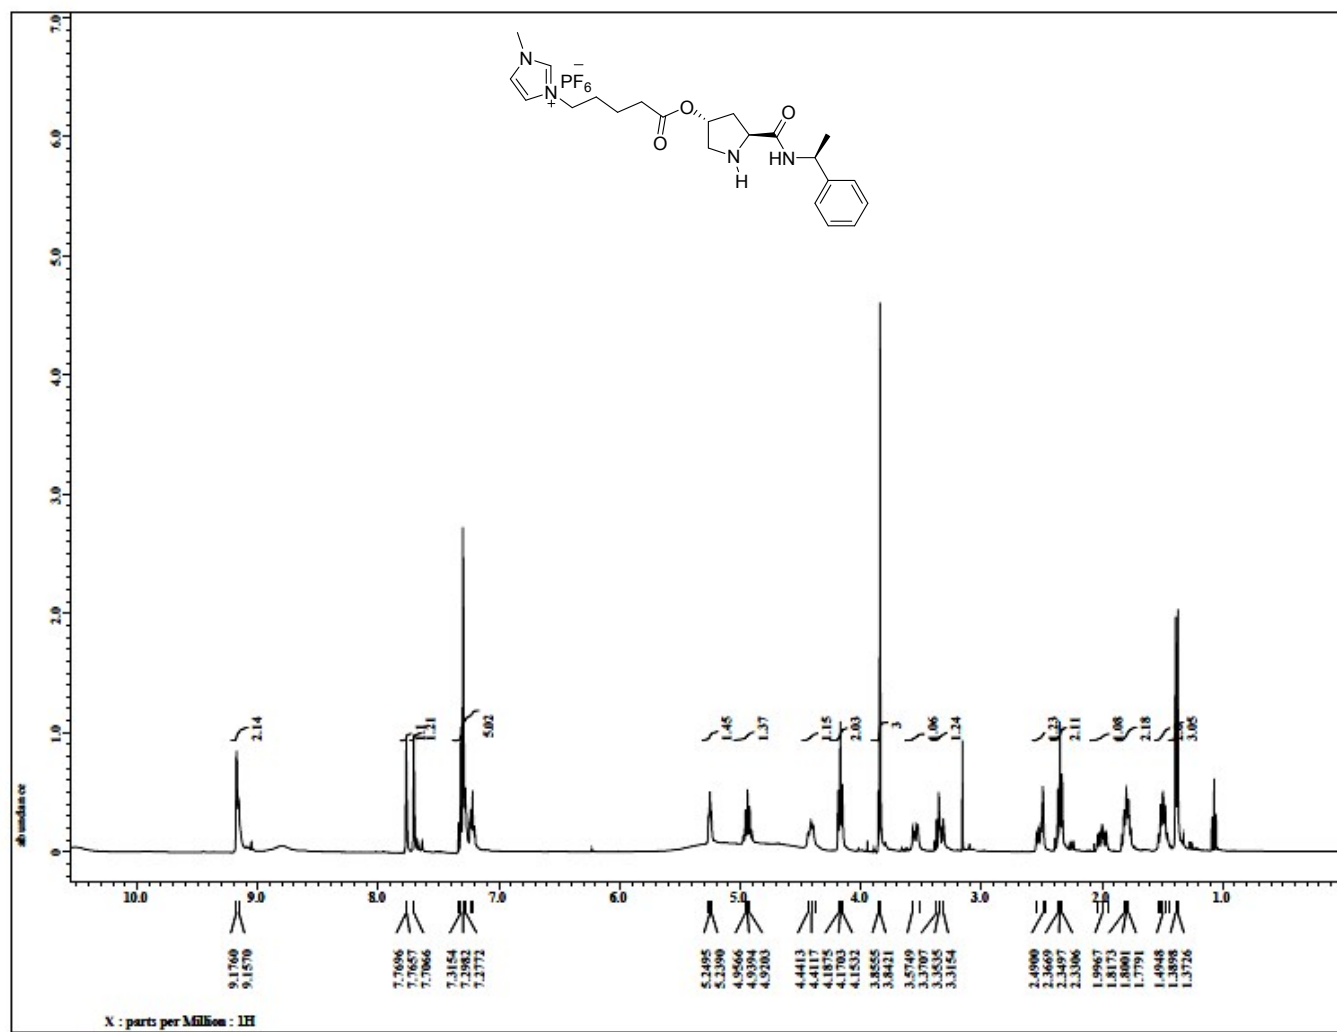

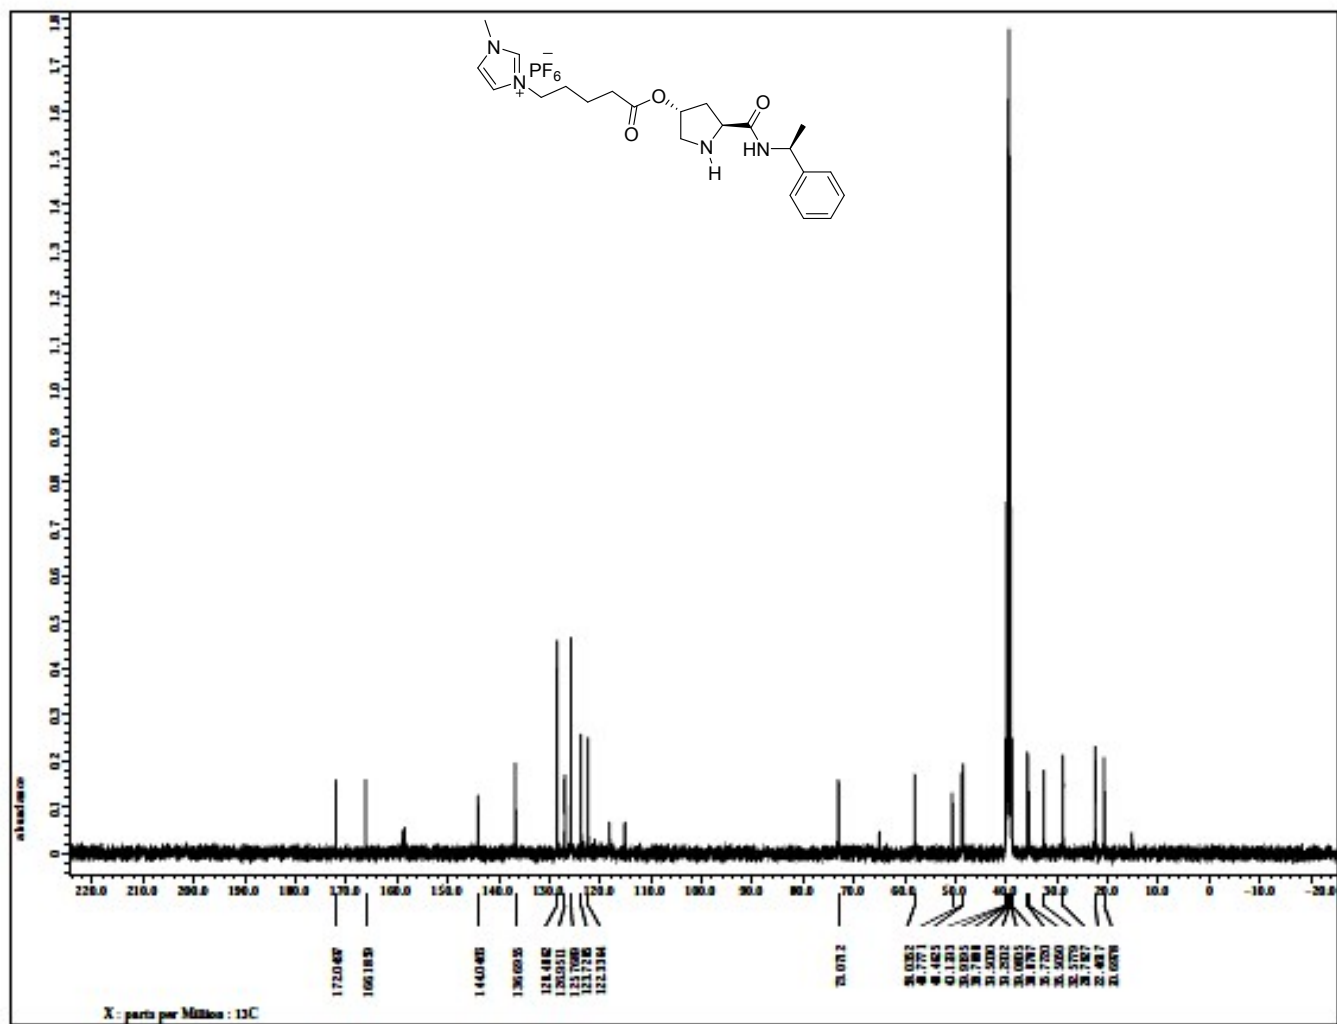

Methyls of IL 3

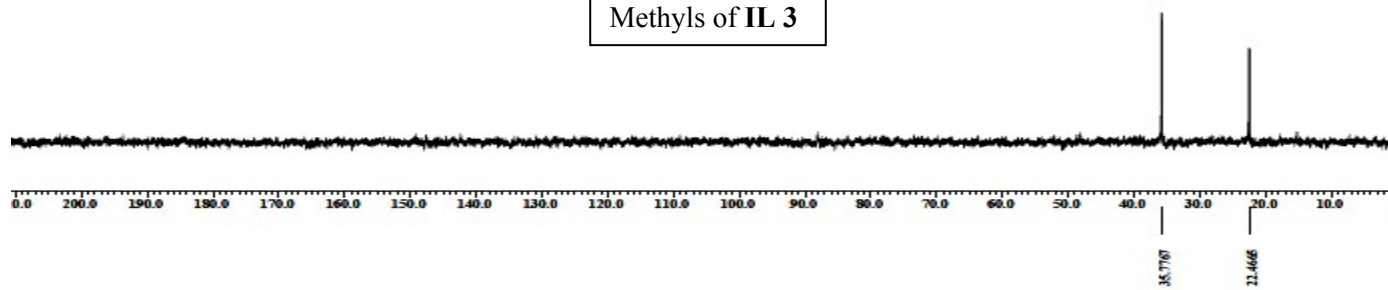

Methylenes of IL 3

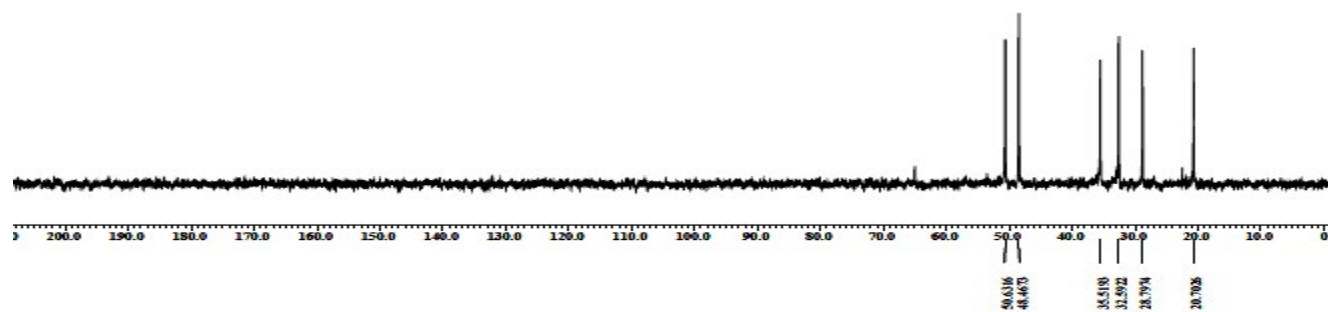

Methines of IL 3

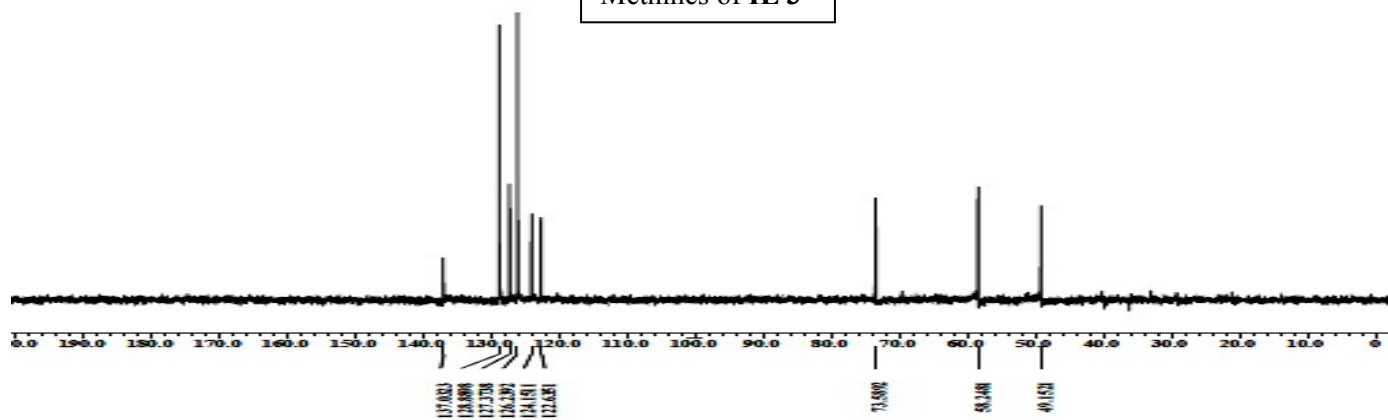

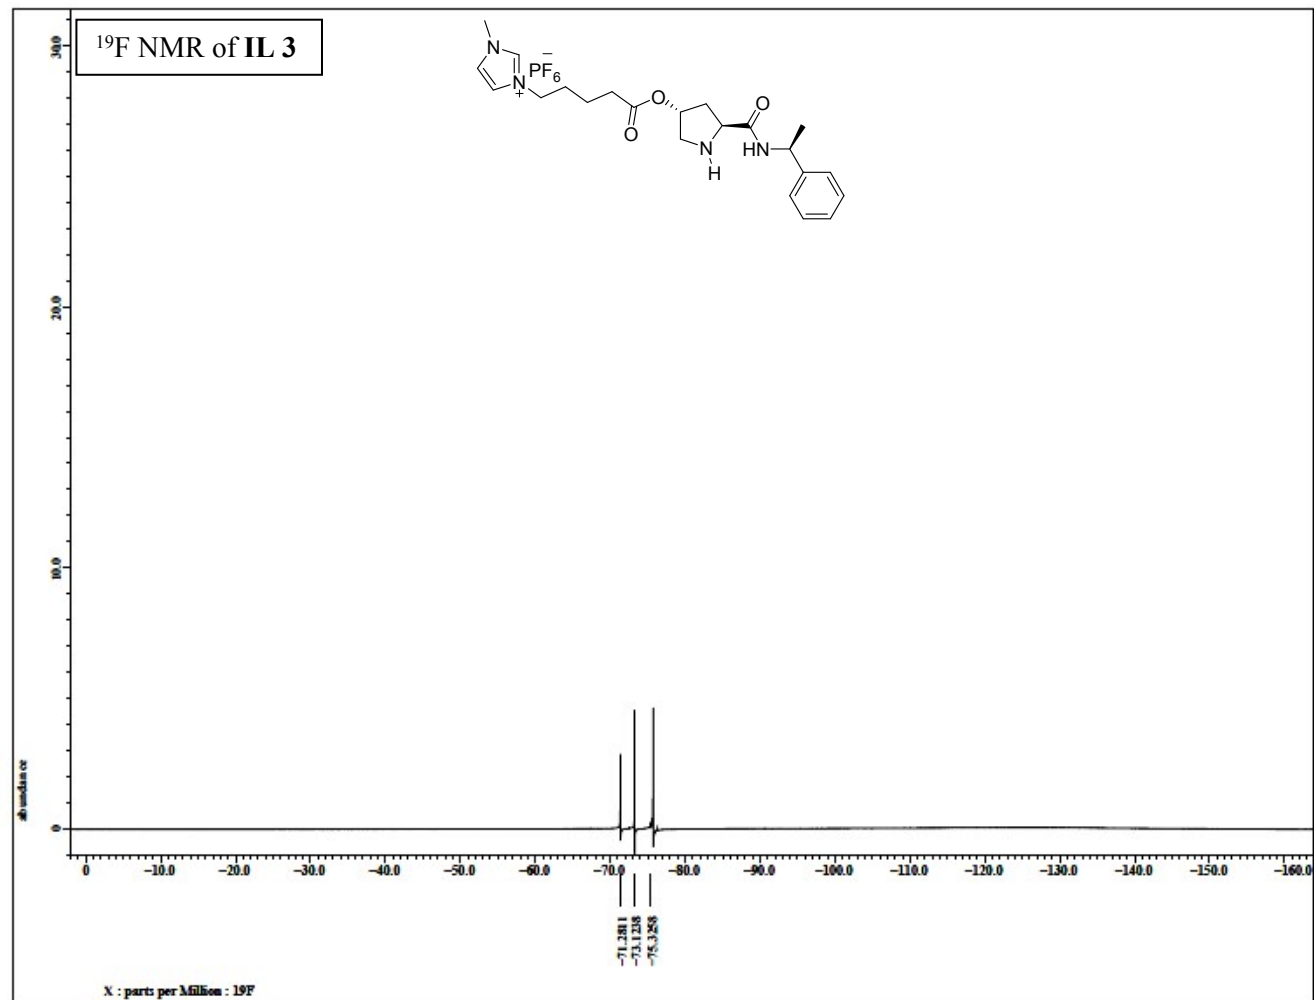

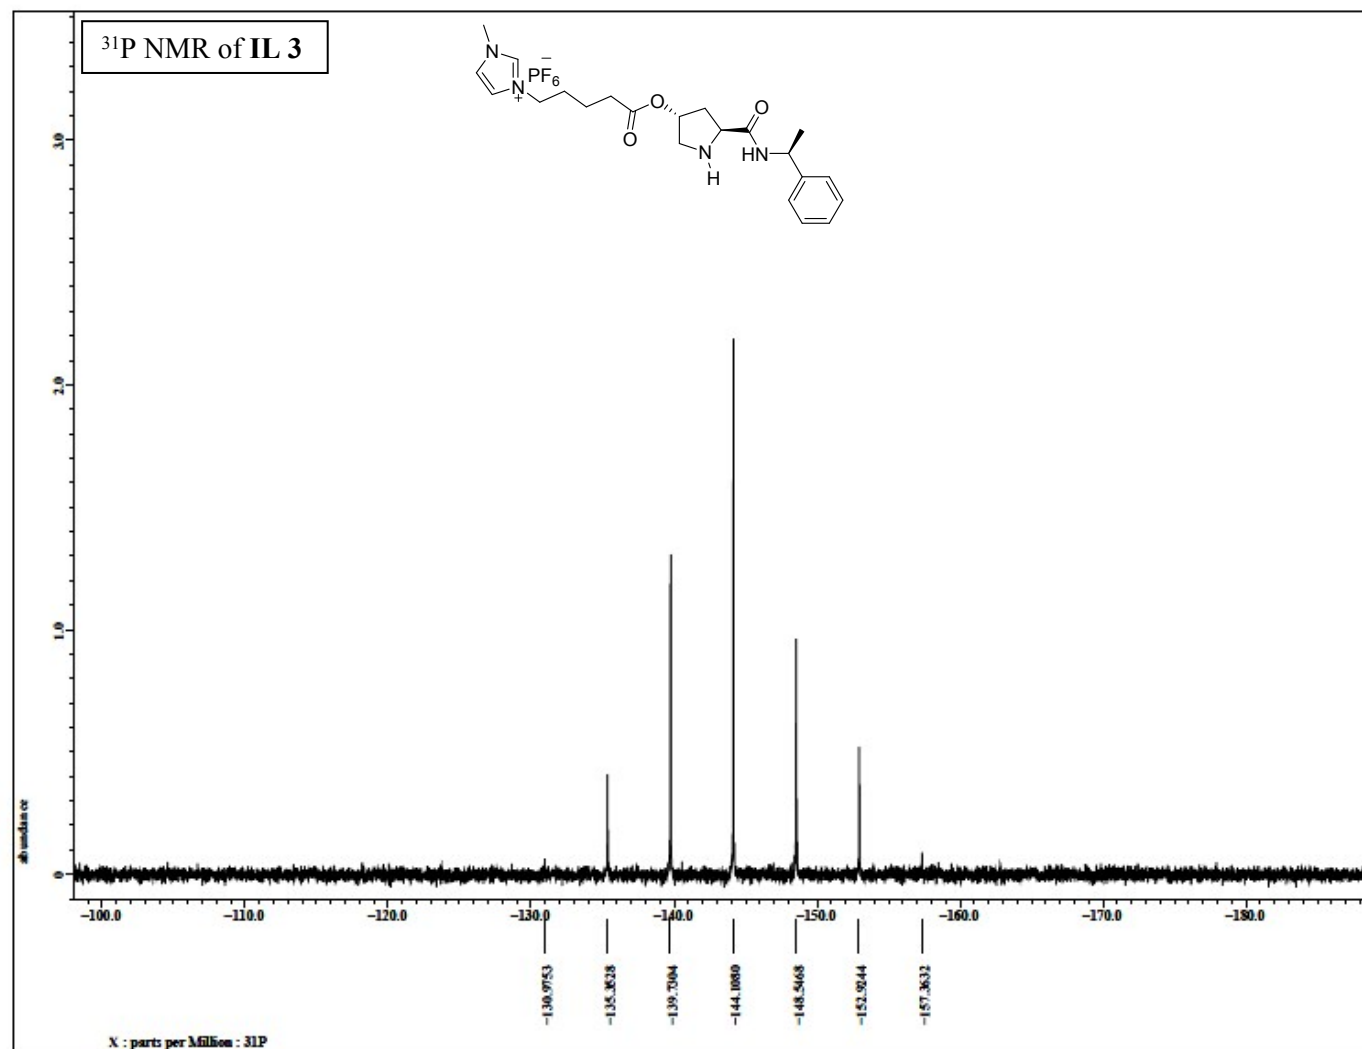

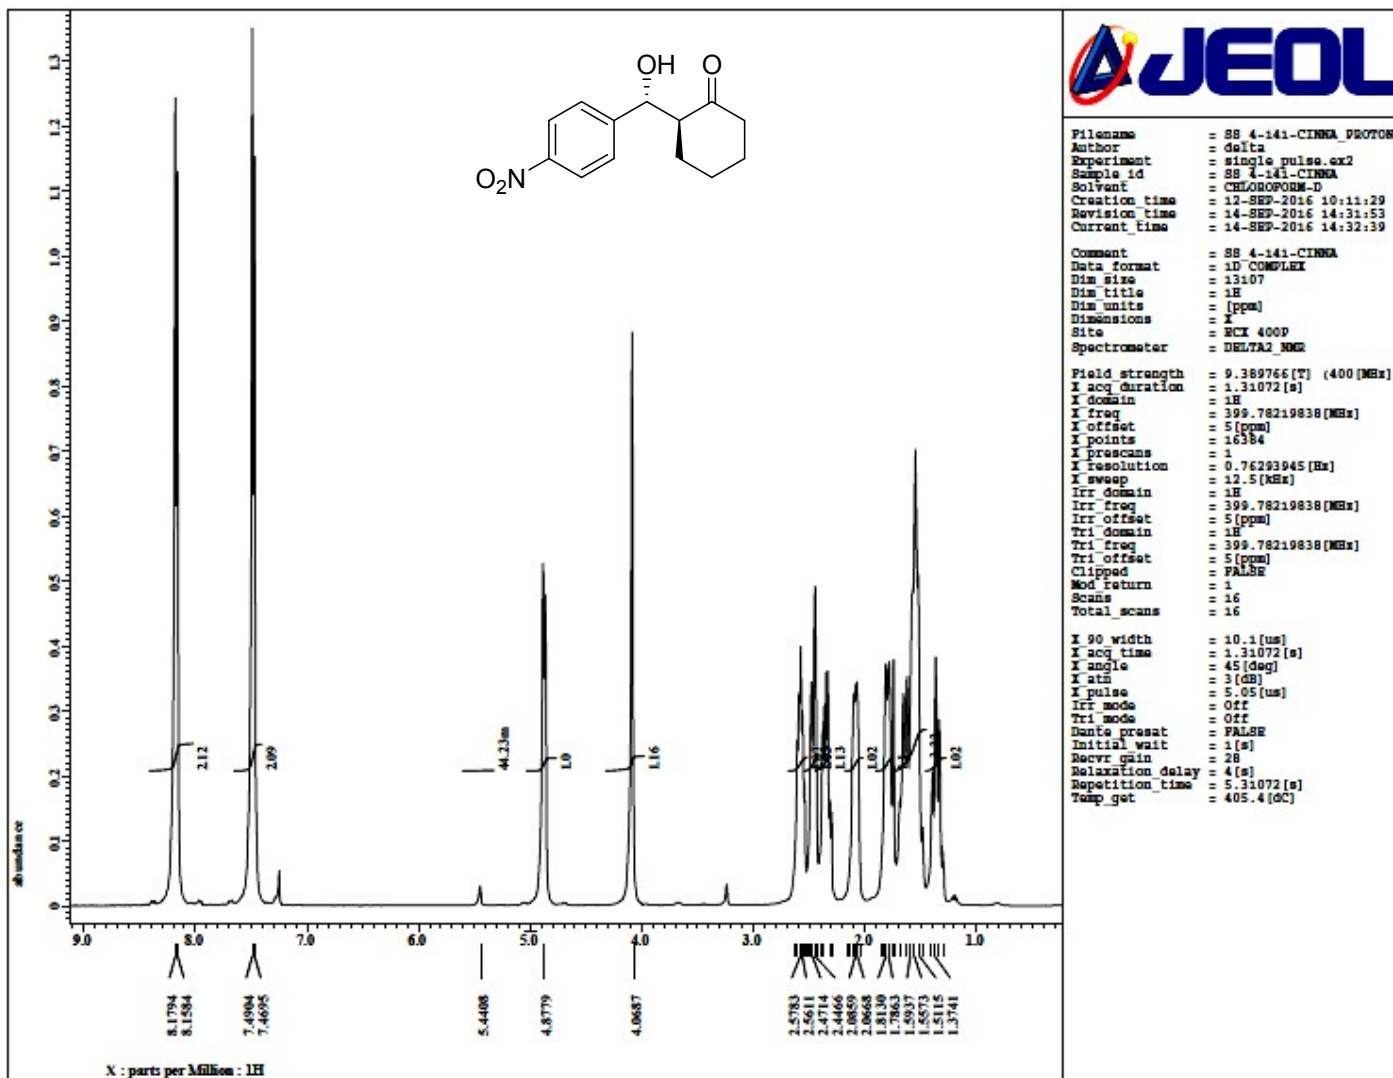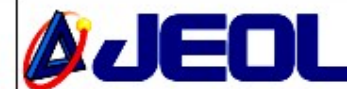

```

Filename      = SB 4-141-CINQA_PROTON
Author       = delta
Experiment   = single pulse.ex2
Sample id    = SB 4-141-CINQA
Solvent      = CHLOROFORM-D
Creation time = 12-SEP-2016 10:11:29
Revision time = 14-SEP-2016 14:31:53
Current time  = 14-SEP-2016 14:32:39

Comment      = SB 4-141-CINQA
Data format  = 1D COMPLEX
Dim size     = 13107
Dim title    = 1H
Dim units    = [ppm]
Dimensions   = 1
Site         = EXY 400P
Spectrometer = DELTA2 400P

Field strength = 9.389766 [T] (400 [MHz])
X_acq duration = 1.31072 [s]
X_domain       = 1H
X_freq         = 399.78219838 [MHz]
X_offset       = 5 [ppm]
X_points       = 16384
X_prescans     = 1
X_resolution   = 0.76293945 [Hz]
X_sweep        = 12.5 [MHz]
F1_domain      = 1H
F1_freq        = 399.78219838 [MHz]
F1_offset       = 5 [ppm]
Clipped        = FALSE
Mod return     = 1
Scans          = 16
Total scans    = 16

X_90 width    = 10.1 [us]
X_acq time     = 1.31072 [s]
X_angle        = 45 [deg]
X_atn          = 3 [dB]
X_pulse        = 5.05 [us]
F1_mode        = Off
F1_offset       = Off
Date preset    = FALSE
Initial wait   = 1 [s]
Recvr gain     = 28
Relaxation delay = 4 [s]
Repetition time = 5.31072 [s]
Temp_get       = 405.4 [dC]
  
```

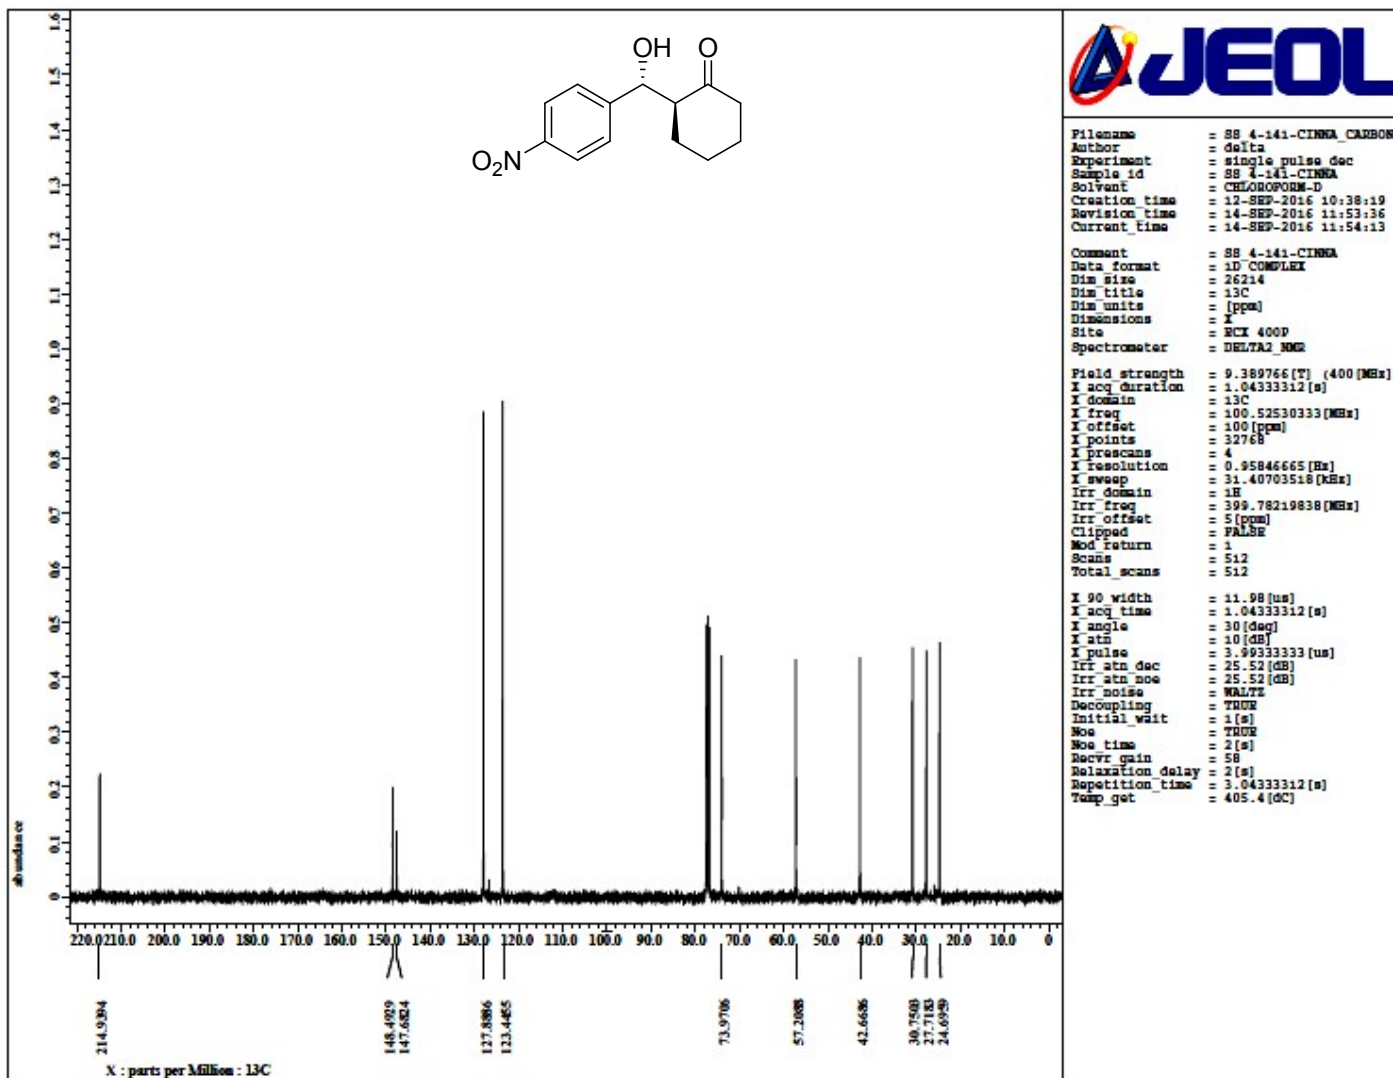



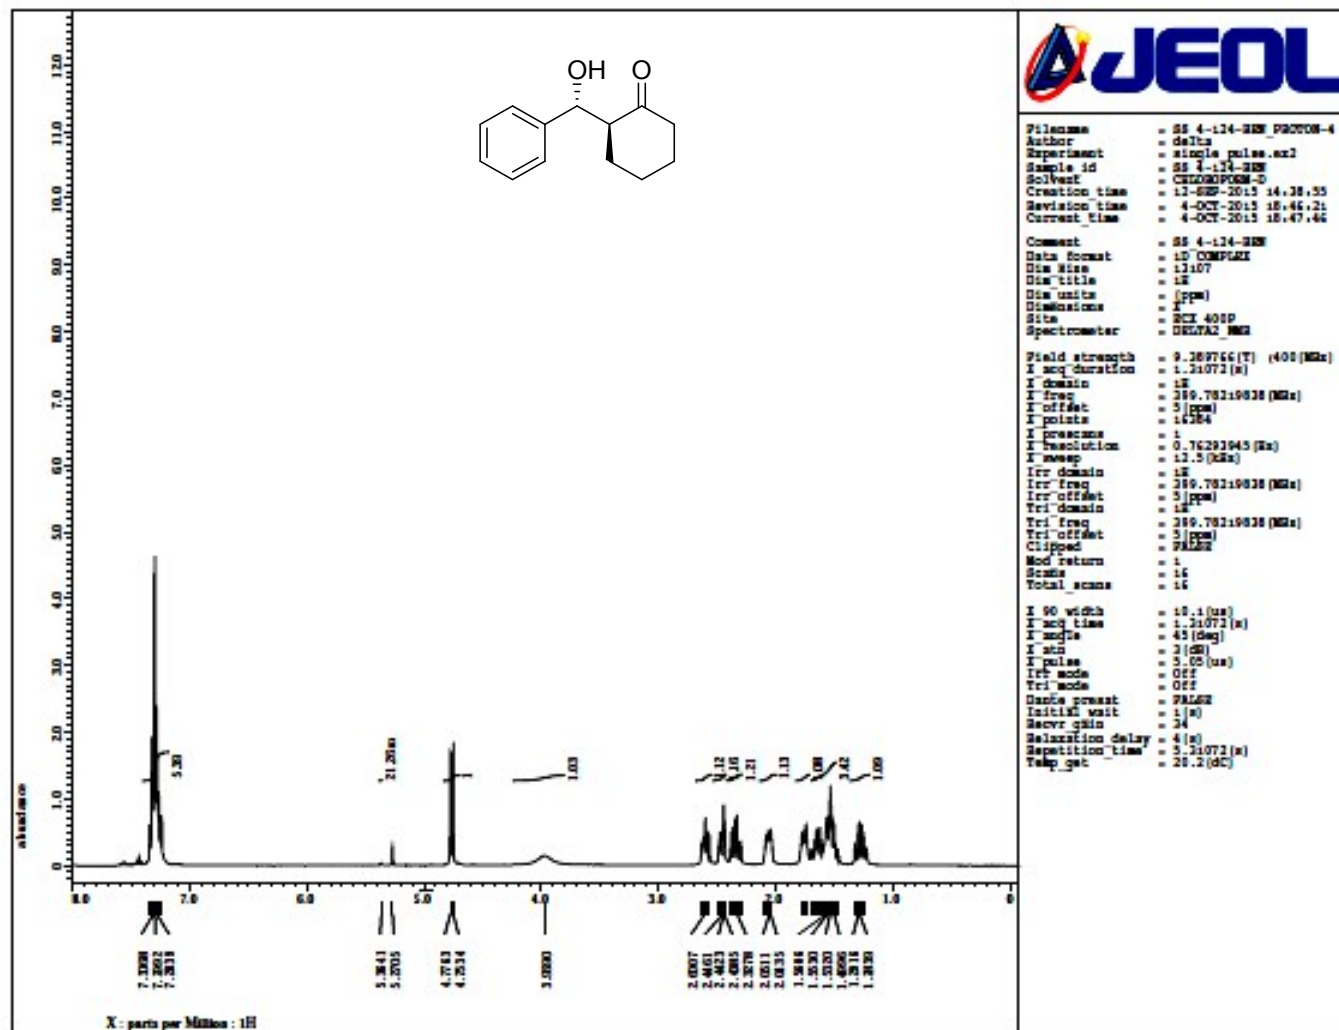

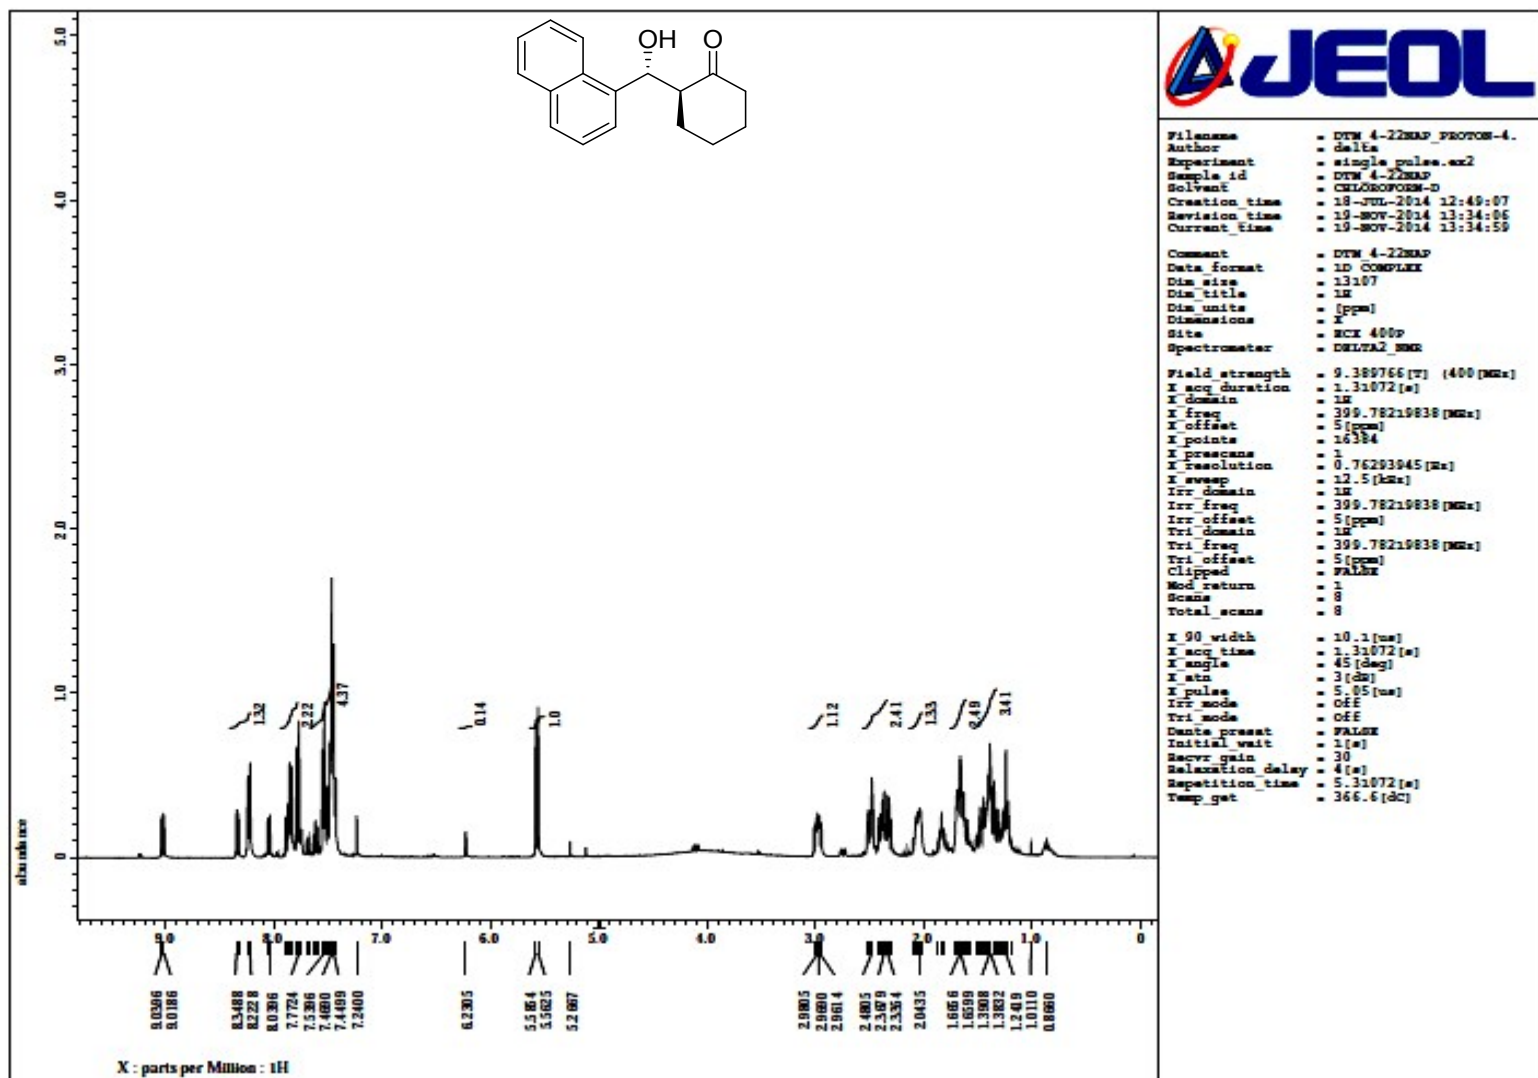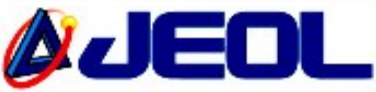

```

Filename      = DTM 4-22MAP_PROTON-4.
Author        = delta
Experiment    = single pulse.ex2
Sample id     = DTM 4-22MAP
Solvent       = CHLOROFORM-D
Creation time  = 18-JUL-2014 12:49:07
Revision time  = 19-NOV-2014 13:34:06
Current time  = 19-NOV-2014 13:34:59

Comment       = DTM 4-22MAP
Data format   = 1D COMPLEX
Dir size      = 13107
Dir title     = 1H
Dir units     = [ppm]
Dimensions    = 2
Site          = HX 400P
Spectrometer  = DELTA2 NMR

Field strength = 9.399766 [T] (400 [MHz])
F1 acq duration = 1.31072 [s]
F1 domain      = 1H
F1 freq        = 399.78219838 [MHz]
F1 offset      = 5 [ppm]
F1 points      = 16384
F1 prescans    = 1
F1 resolution  = 0.76293945 [Hz]
F1 sweep       = 12.5 [kHz]
F1r domain     = 1H
F1r freq       = 399.78219838 [MHz]
F1r offset     = 5 [ppm]
F1r points     = 1H
F1r prescans  = 1
F1r resolution = 0.76293945 [Hz]
F1r sweep      = 12.5 [kHz]
F1r domain     = 1H
F1r freq       = 399.78219838 [MHz]
F1r offset     = 5 [ppm]
Clipped       = FALSE
Mod return    = 1
Scans         = 8
Total scans   = 8

F2 90 width    = 10.1 [us]
F2 acq time    = 1.31072 [s]
F2 angle       = 45 [deg]
F2 atm        = 3 [dB]
F2 pulse      = 5.95 [us]
F2r mode      = OEE
F2r mode      = OEE
Dante preset   = FALSE
Initial wait   = 1 [s]
Recvr gain    = 30
Relaxation delay = 4 [s]
Repetition time = 5.31072 [s]
Temp_get      = 366.6 [dC]
  
```

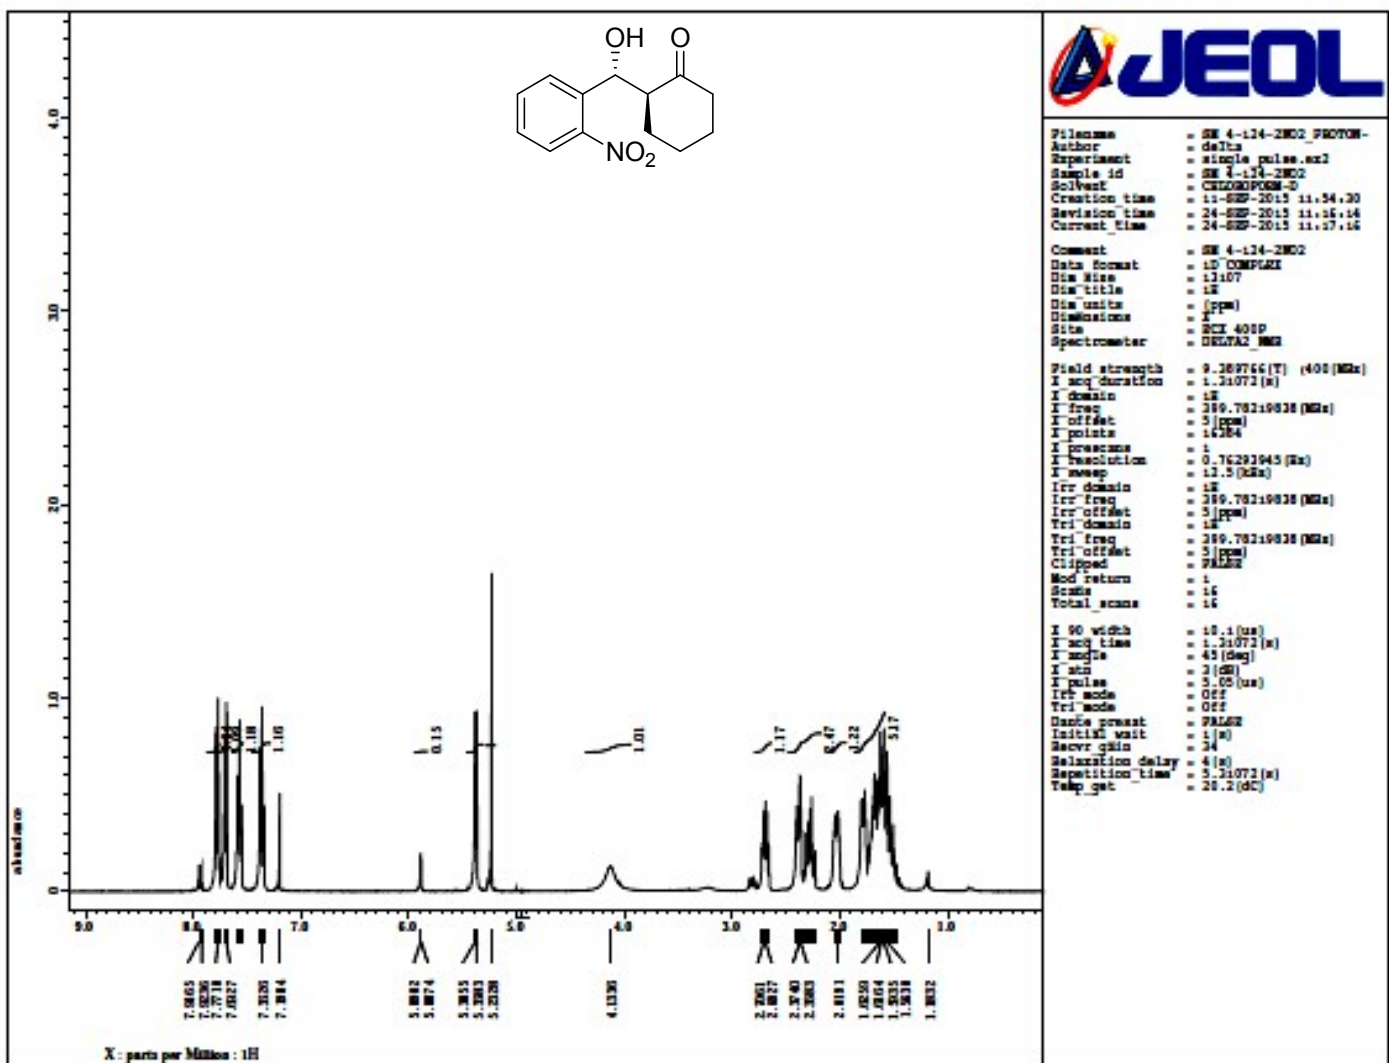

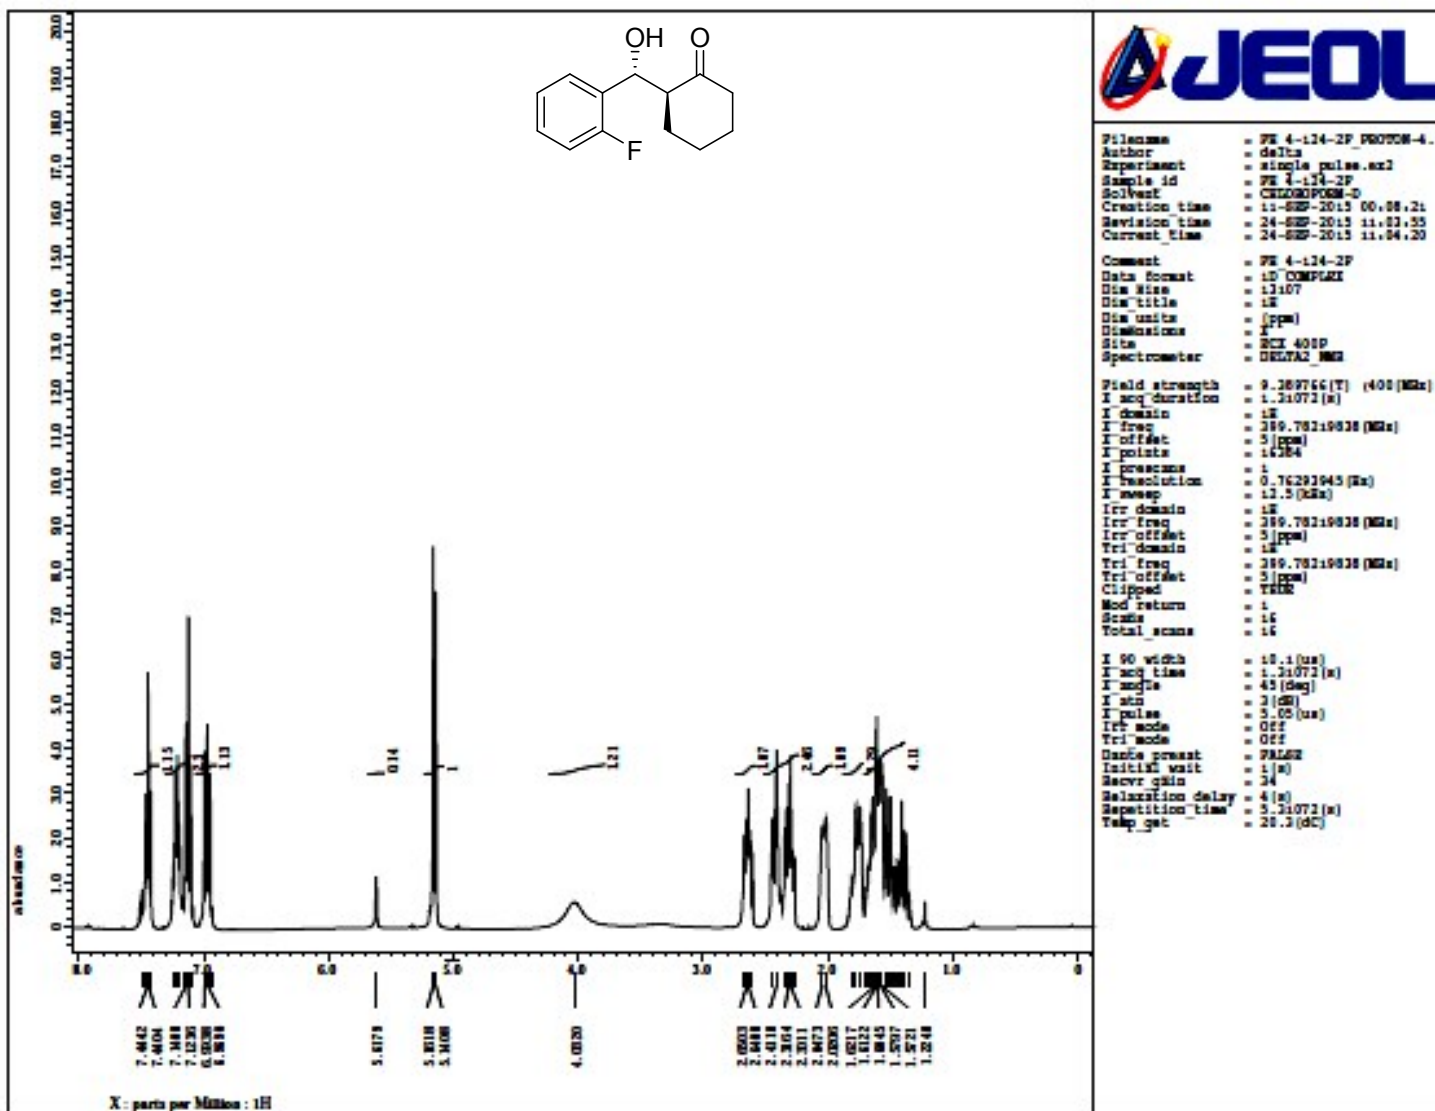

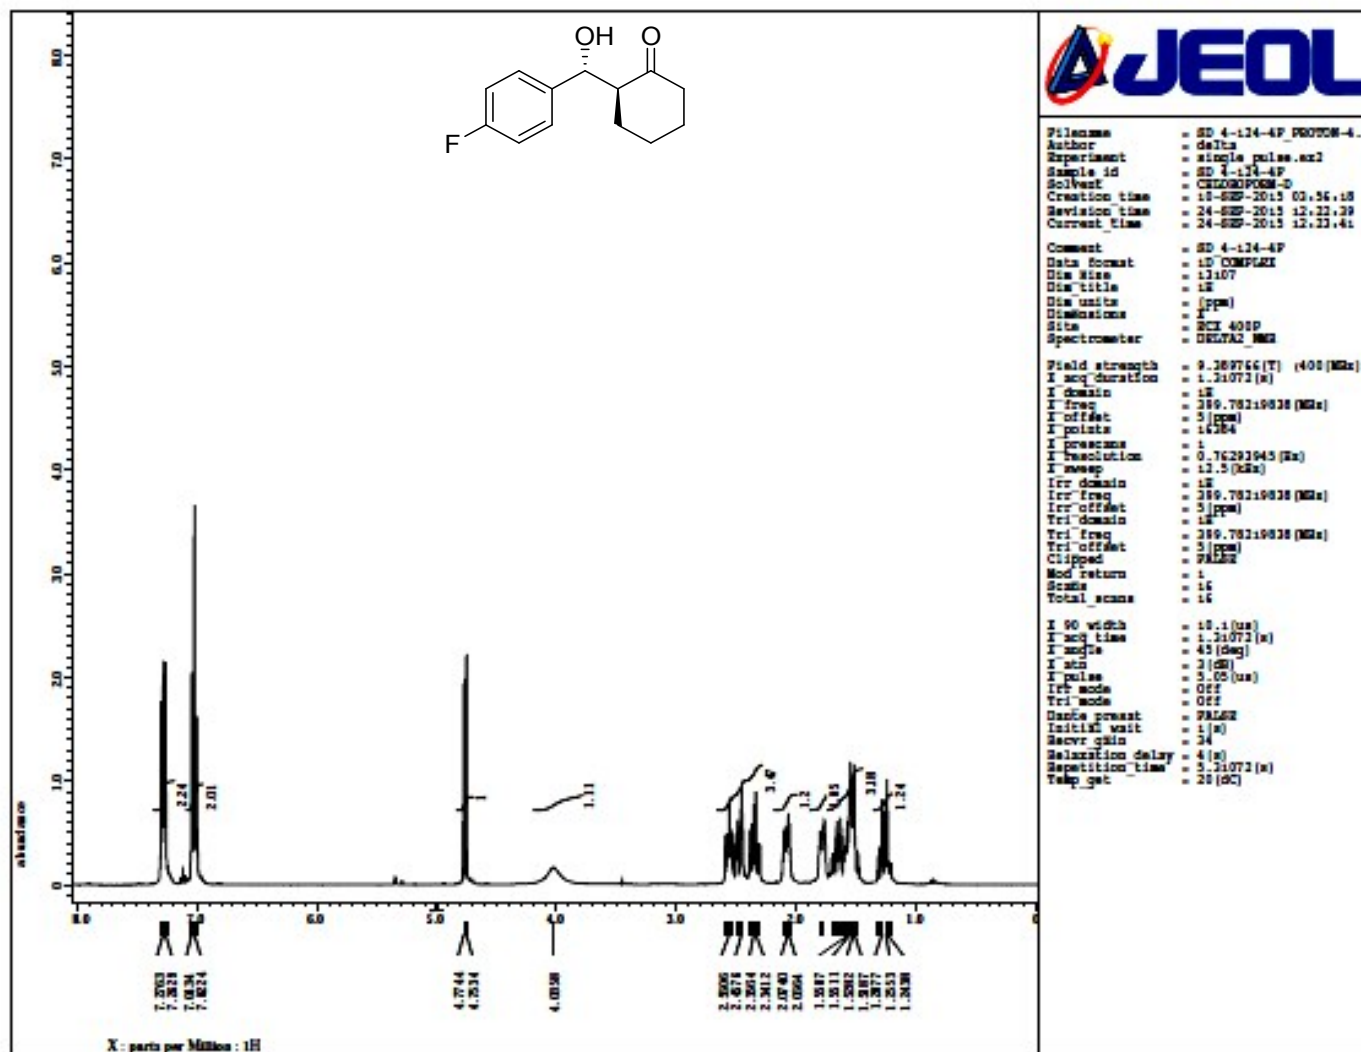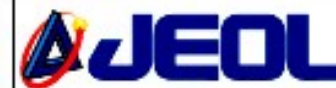

```

Filename      = SD 4-134-4P_PROTON-4.
Author        = delta
Experiment    = single pulse.ex2
Sample id     = SD 4-134-4P
Solvent       = CDCl3/POEM-D
Creation time  = 24-SEP-2015 02:56:18
Revision time = 24-SEP-2015 12:32:39
Current time  = 24-SEP-2015 12:32:41

Comment       = SD 4-134-4P
Data format   = 1D COMPLEX
Data size     = 13107
Data title    = 1H
Data units    = (ppm)
Dimensions    = 1
Site          = SCI 40SP
Spectrometer  = DELTA2 500

Field strength = 9.269766(T) (400(MHz))
F1 acq duration = 1.31072 (s)
F1 domain      = 1H
F1 freq        = 399.78219838 (MHz)
F1 offset      = 5 (ppm)
F1 points      = 14284
F1 prescans    = 1
F1 resolution  = 0.76293945 (Hz)
F1 sweep       = 12.5 (kHz)
F1rr domain    = 1H
F1rr freq      = 399.78219838 (MHz)
F1rr offset    = 5 (ppm)
F1rr domain    = 1H
F1rr freq      = 399.78219838 (MHz)
F1rr offset    = 5 (ppm)
Clipped       = FALSE
Mod return    = 1
Scale         = 16
Total scans   = 16

F1 90 width    = 10.1 (us)
F1 acq time    = 1.31072 (s)
F1 angle       = 45 (deg)
F1 str         = 2 (dB)
F1 pulse       = 5.05 (us)
F1r mode       = Off
F1rr mode      = Off
Datae preset   = PALSI
Initia1 wait   = 1 (s)
Recvr gain     = 34
Relaxation delay = 4 (s)
Repetition time = 1.31072 (s)
Temp_get       = 20 (C)

```

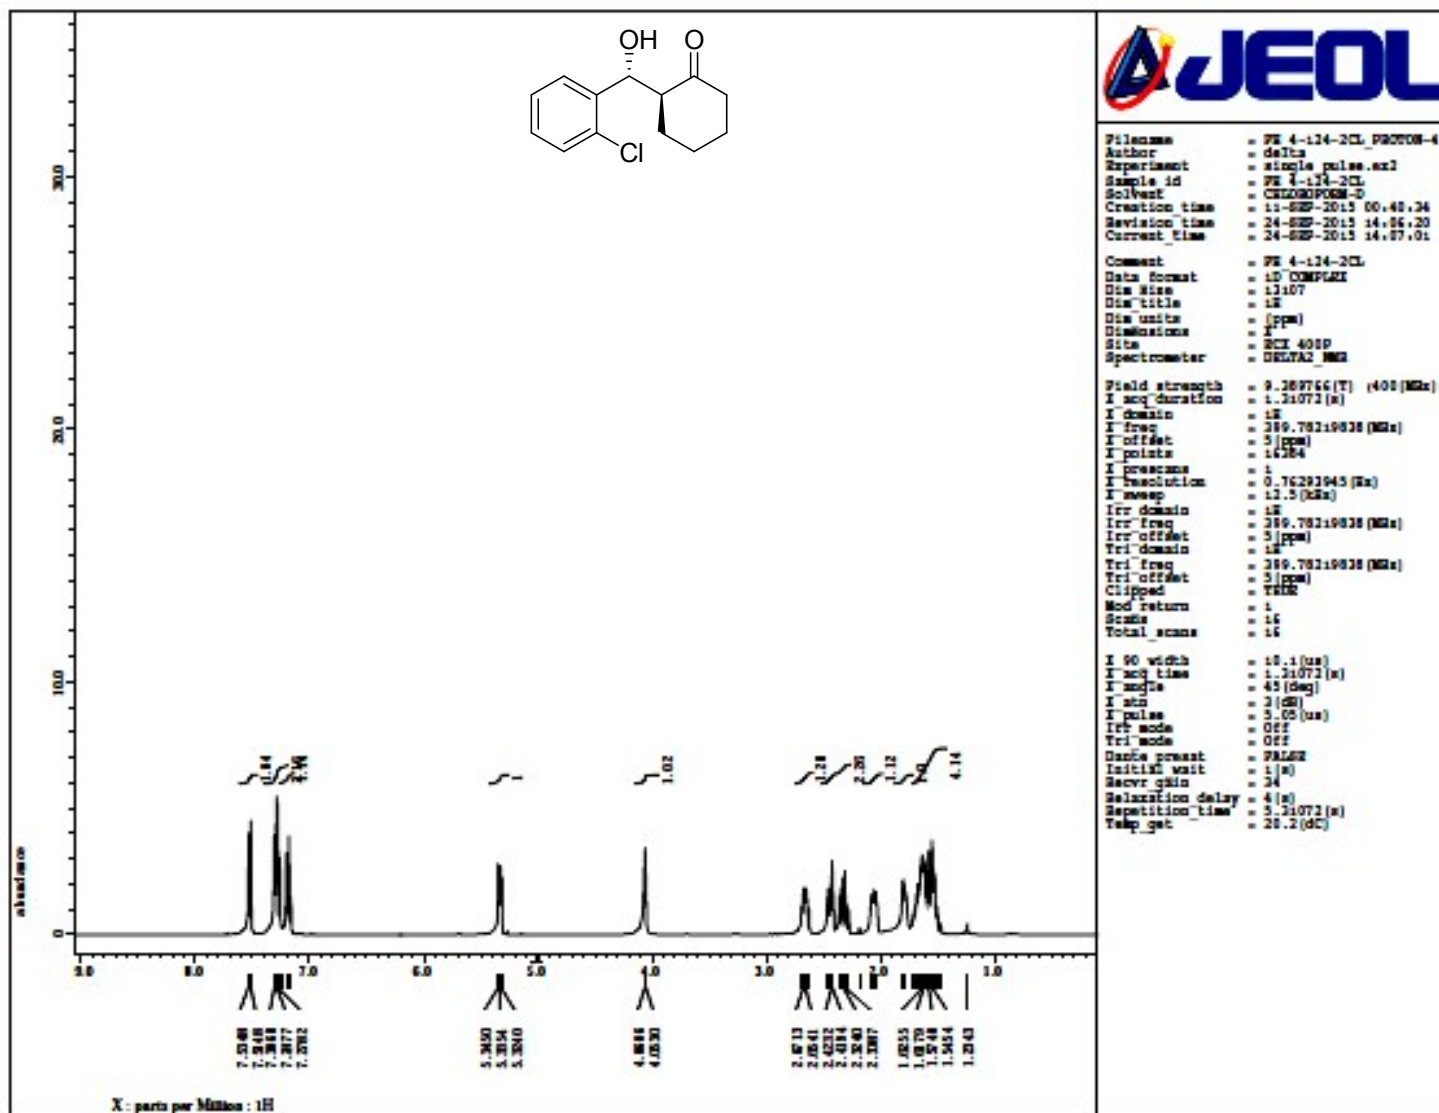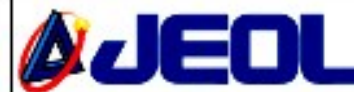

```

Filename      = PE 4-134-2CL_PROTON-4
Author        = delta
Experiment    = single pulse.sc2
Sample id     = PE 4-134-2CL
Solvent       = CDCl3/PCOM-D
Creation time  = 13-SEP-2013 00:40:34
Revision time = 24-SEP-2013 14:06:20
Current time  = 24-SEP-2013 14:07:01

Comment       = PE 4-134-2CL
Data format   = 1D COMPAK
File size     = 13107
Dir title     = 1S
Dir units     = (ppm)
Dimensions    = 1
Site          = RFX 40SP
Spectrometer  = DELTA2 400

Field strength = 9.39766(T) (400(MHz))
F1 acq duration = 1.21071(s)
F1 domain      = 1S
F1 freq        = 399.7819838 (MHz)
F1 offset      = 5(ppm)
F1 points      = 16384
F1 prescan     = 1
F1 resolution  = 0.76291945 (Hz)
F1 sweep       = 13.5 (kHz)
F1r domain     = 1S
F1r freq       = 399.7819838 (MHz)
F1r offset     = 5(ppm)
F1r points     = 1S
F1r sweep      = 13.5 (kHz)
Tri domain    = 1S
Tri freq      = 399.7819838 (MHz)
Tri offset    = 5(ppm)
Tri points    = 16384
Tri sweep     = 13.5 (kHz)
Mod return    = 1
Scale         = 16
Total scans   = 16

F1 90 width   = 10.1 (us)
F1 acq time   = 1.21071 (s)
F1 mode       = 45 (deg)
F1 pulse      = 3 (dB)
F1r pulse     = 5.05 (us)
F1r mode      = Off
Tri mode      = Off
Dance preset  = PAL62
InitK2 wait   = 1 (s)
Socvr gain    = 34
Relaxation delay = 4 (s)
Repetition time = 5.21071 (s)
Temp_get      = 28.2 (dC)
  
```

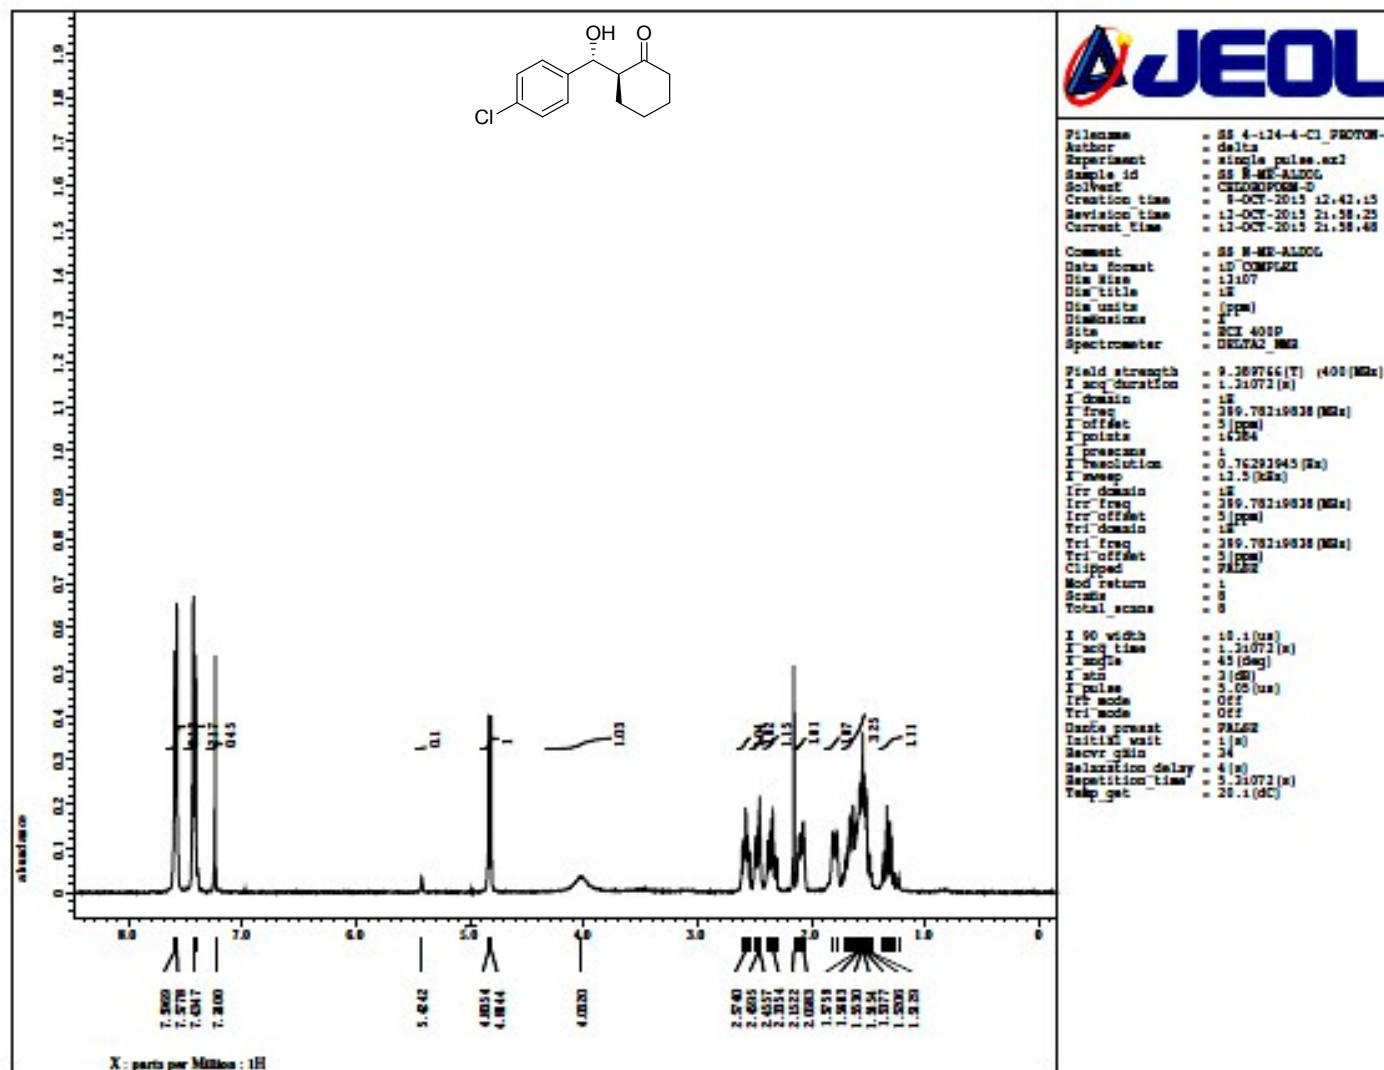

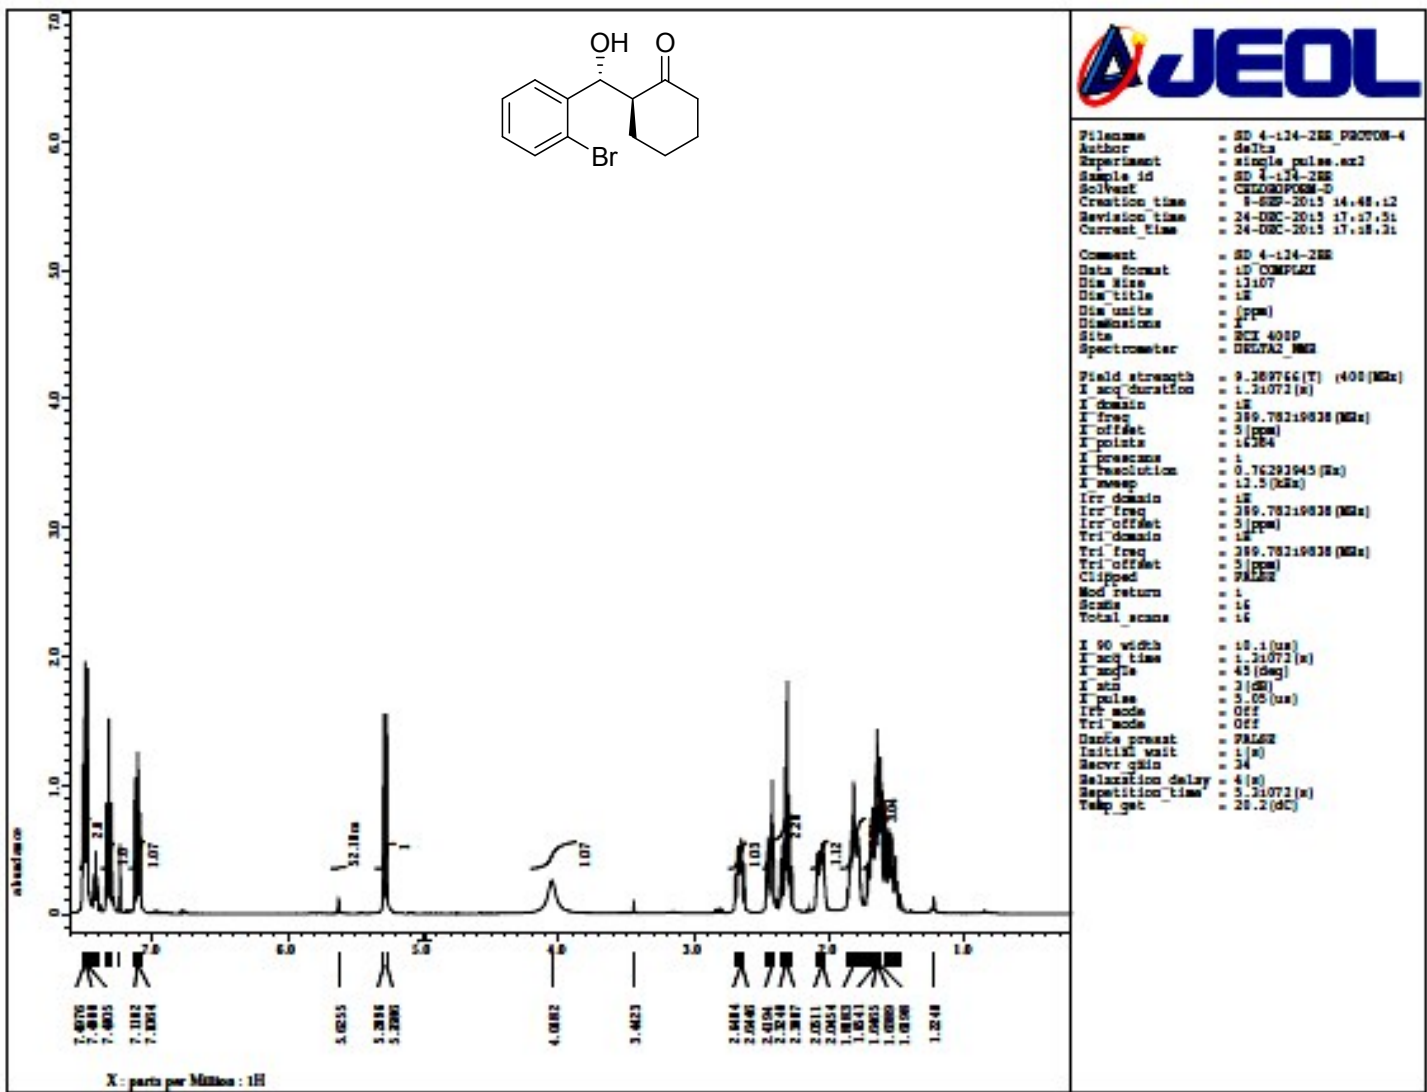



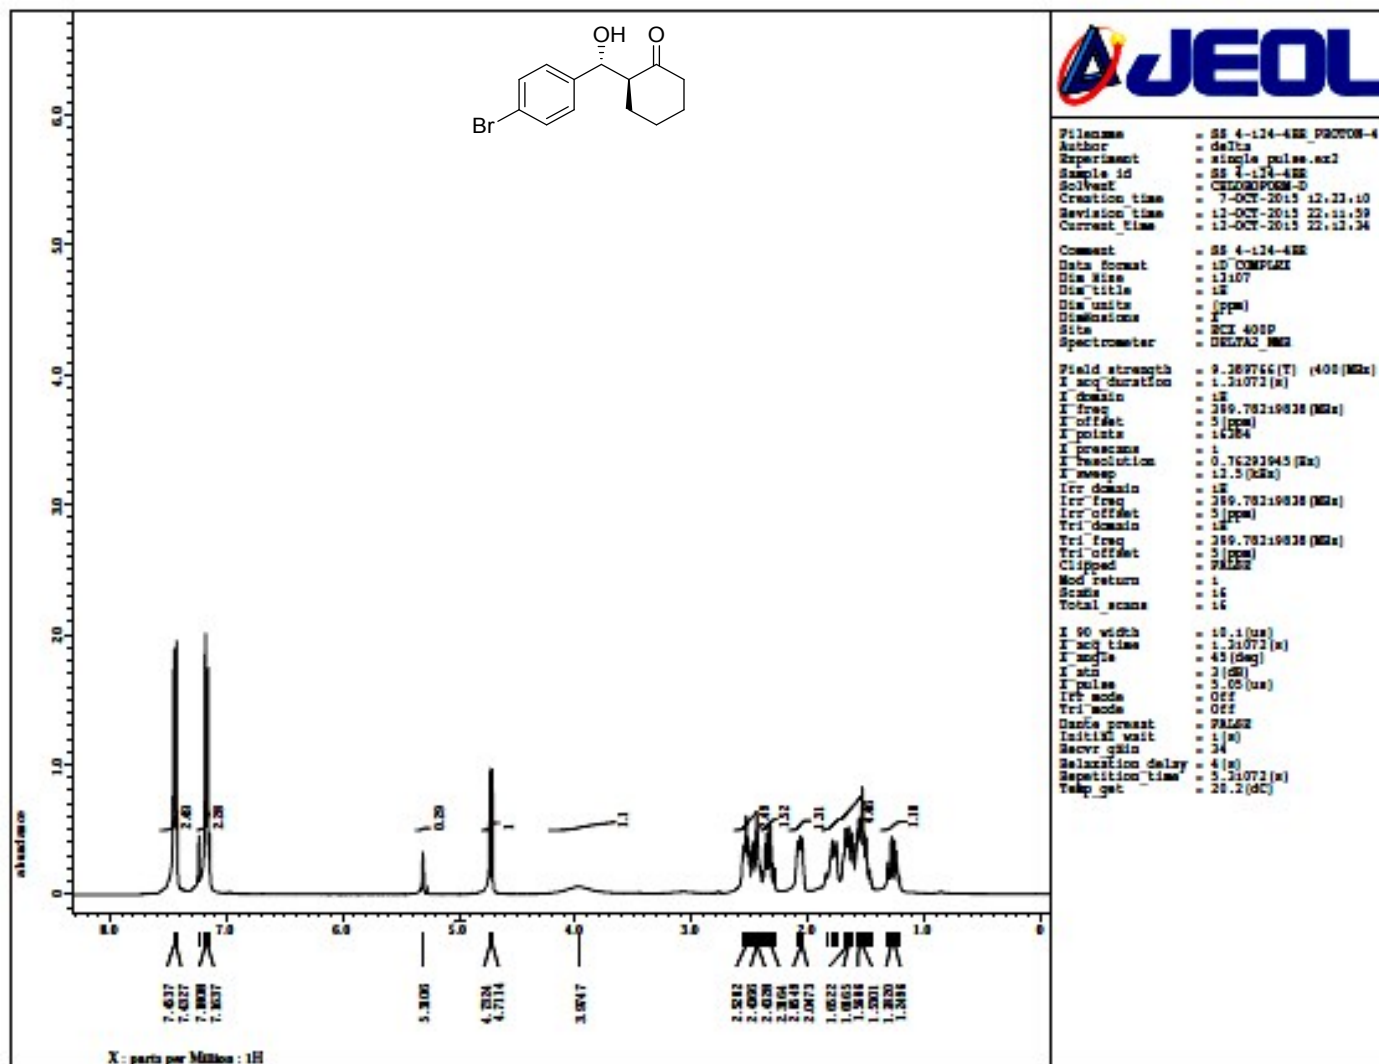

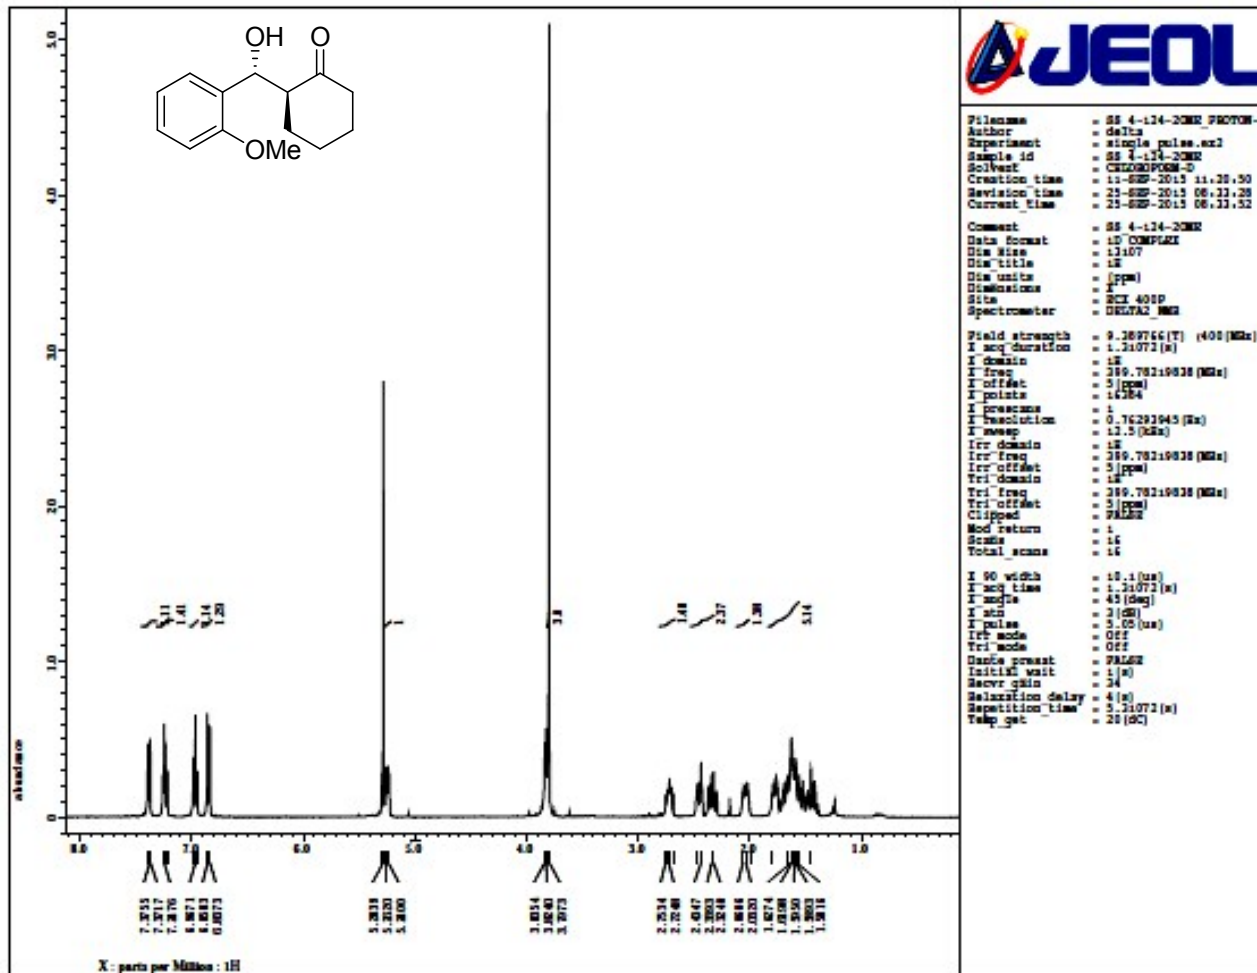

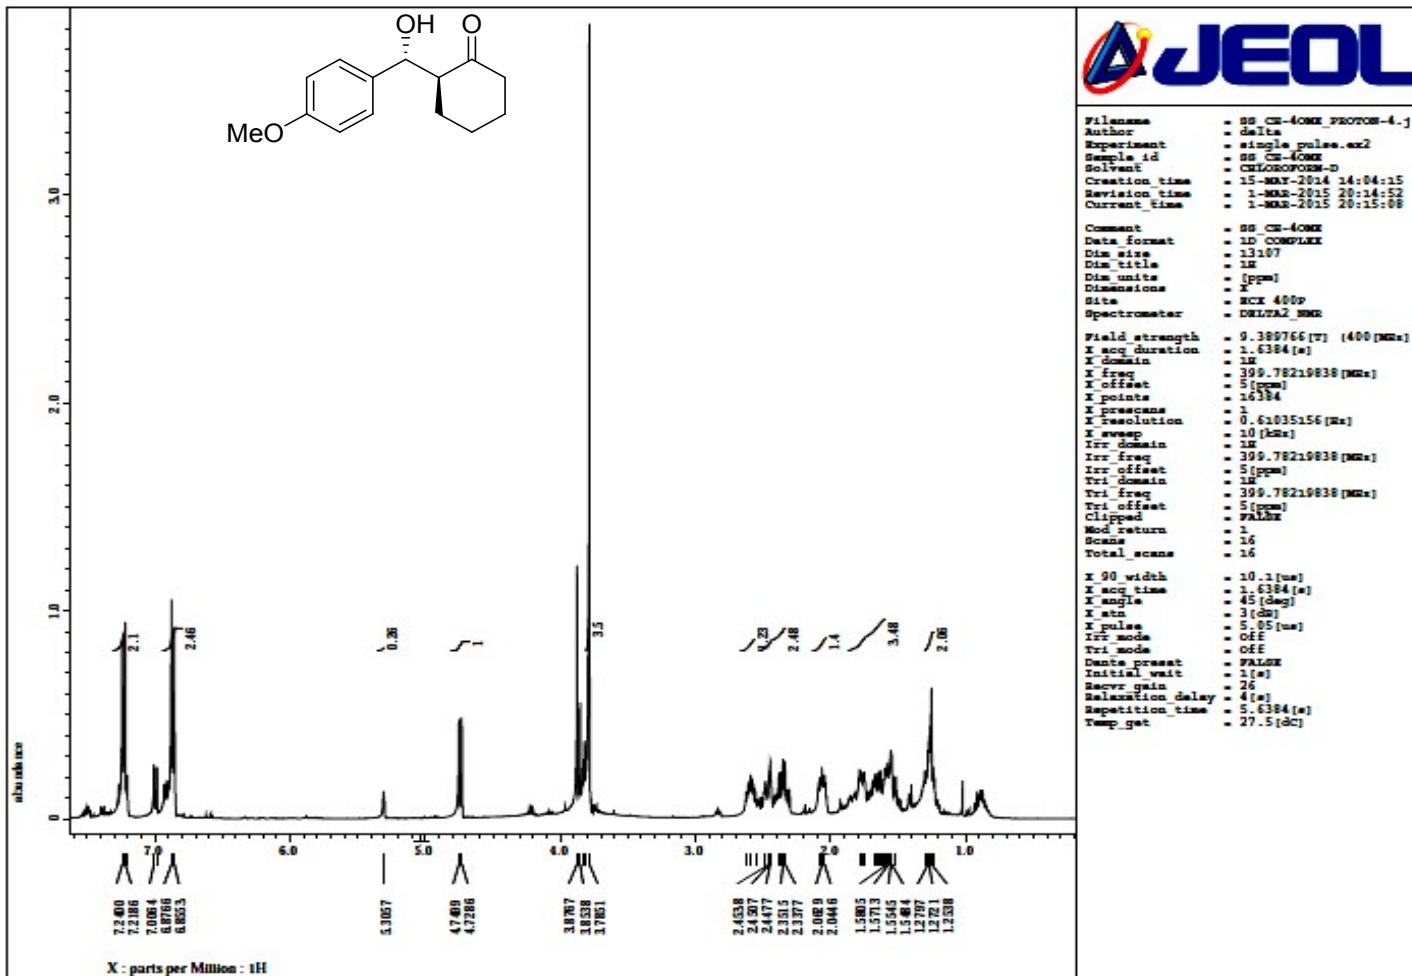

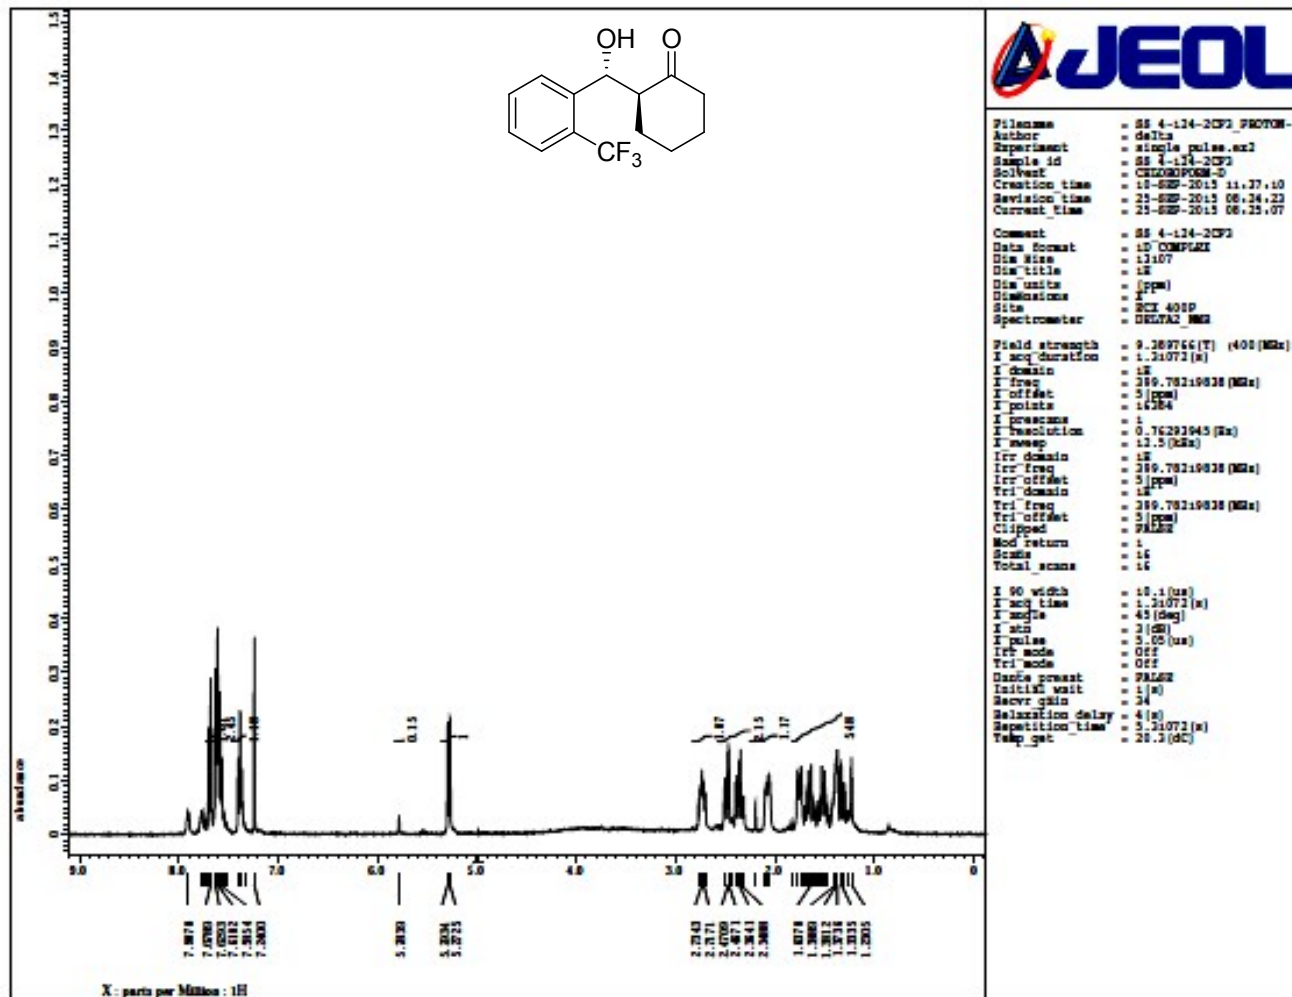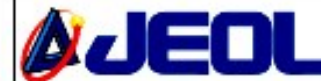

```

Filename      = SS 4-124-2CF3 PROTON-
Author        = ds1ca
Experiment    = single pulse.ex3
Sample id     = SS 4-124-2CF3
Solvent       = CDCl3/POSS-D
Creation time = 12-SEP-2013 11:37:10
Revision time = 25-SEP-2013 06:34:23
Current time  = 25-SEP-2013 06:35:07

Comment       = SS 4-124-2CF3
Data format   = 1D COMPACT
Daq size      = 13107
Daq title     = 12
Daq units     = (ppm)
Dimensions    = 1
Site          = SCI 400P
Spectrometer  = DELTA2_NMR

Field strength = 9.269766(T) (400(MHz))
F1 acq duration = 1.31073(s)
F1 domain      = 12
F1 freq        = 399.70219838(MHz)
F1 offset      = 5(ppm)
F1 points      = 14264
F1 prescans    = 1
F1 resolution   = 0.76292945(Hz)
F1 sweep       = 12.5(KHz)
F1r domain     = 12
F1r freq       = 399.70219838(MHz)
F1r offset     = 5(ppm)
F1r domain     = 12
F1r freq       = 399.70219838(MHz)
F1r offset     = 5(ppm)
Clipped       = FALSE
Mod return    = 1
Scale         = 16
Total scans    = 16

F1 90 width    = 10.1(us)
F1 acq time    = 1.31073(s)
F1 angle       = 45(deg)
F1 sfs         = 3(SM)
F1 pulse       = 9.00(us)
F1r mode       = Off
F1r mode       = Off
Datee preset   = FALSE
Initial wait   = 1(s)
Recvr gain     = 24
Relaxation delay = 4(s)
Repetition time = 5.31073(s)
Temp_set       = 20.2(degC)

```

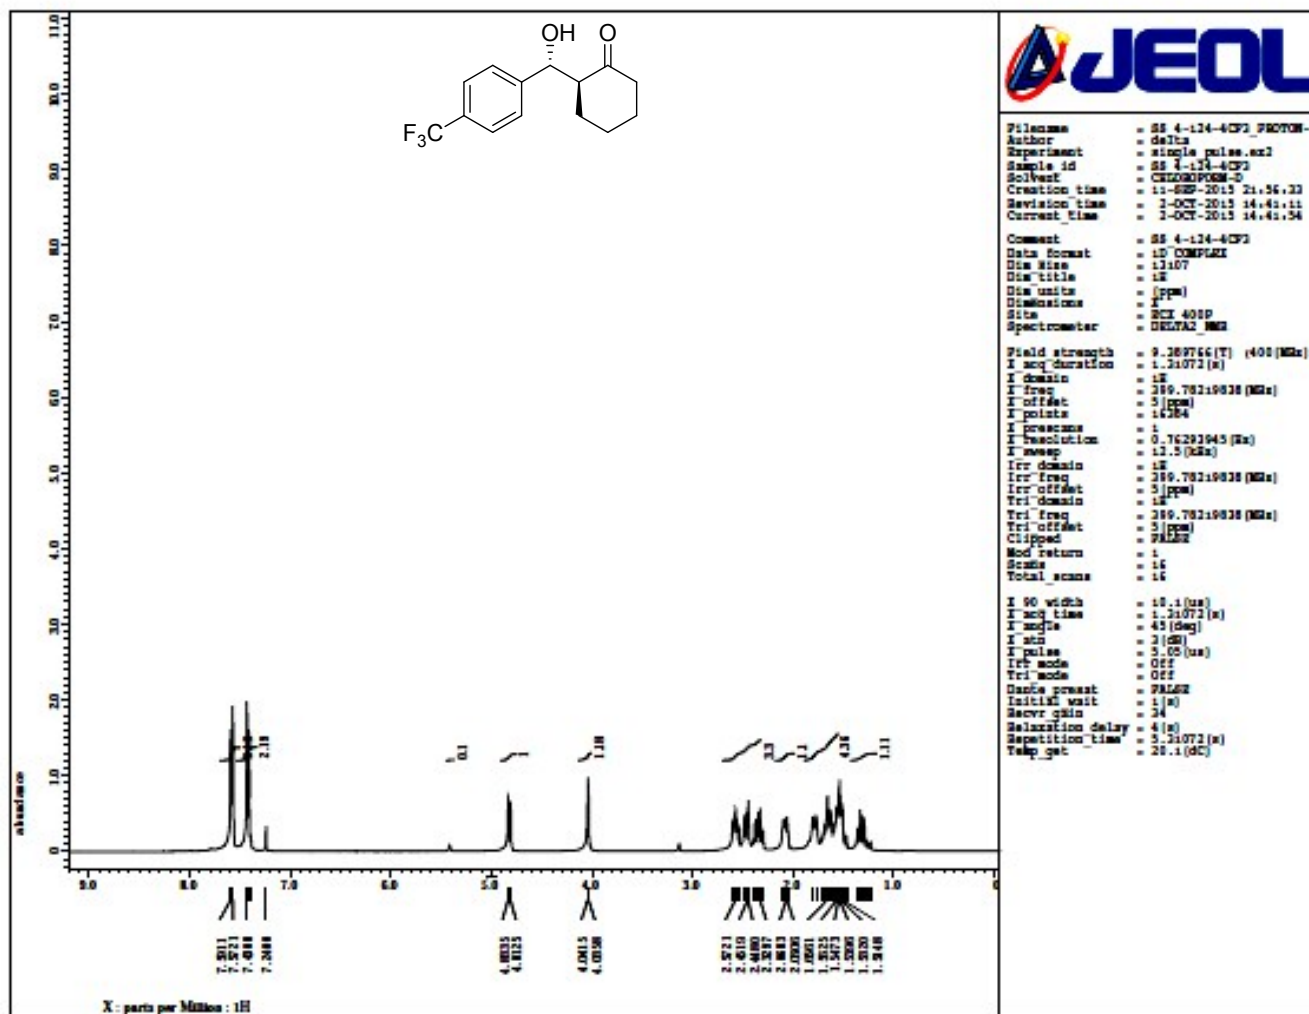

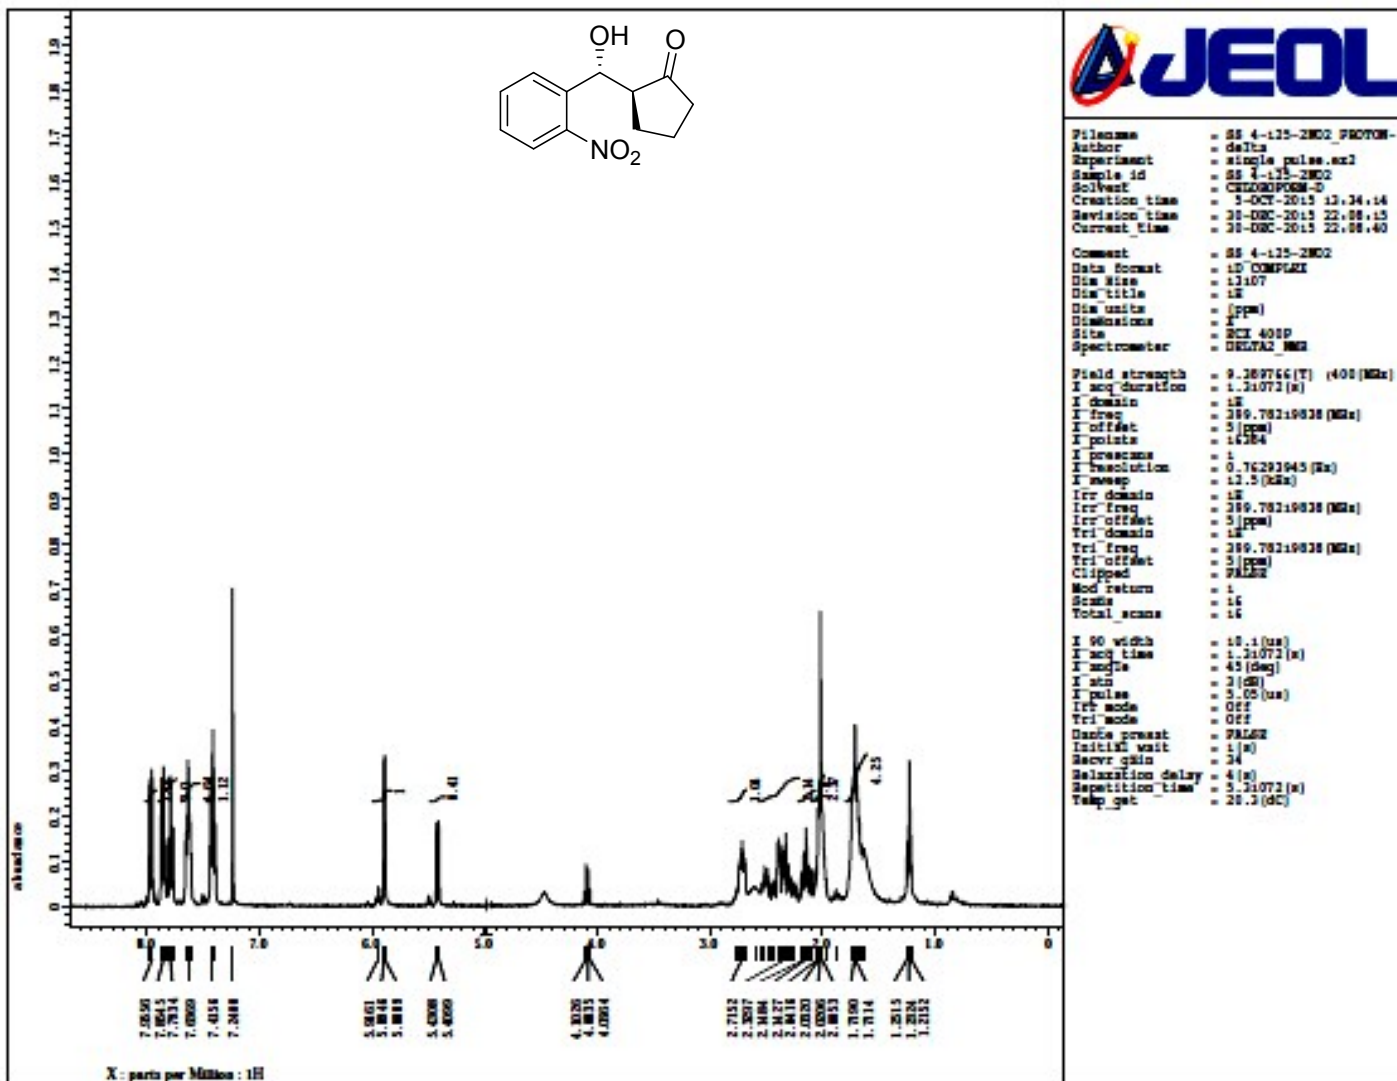

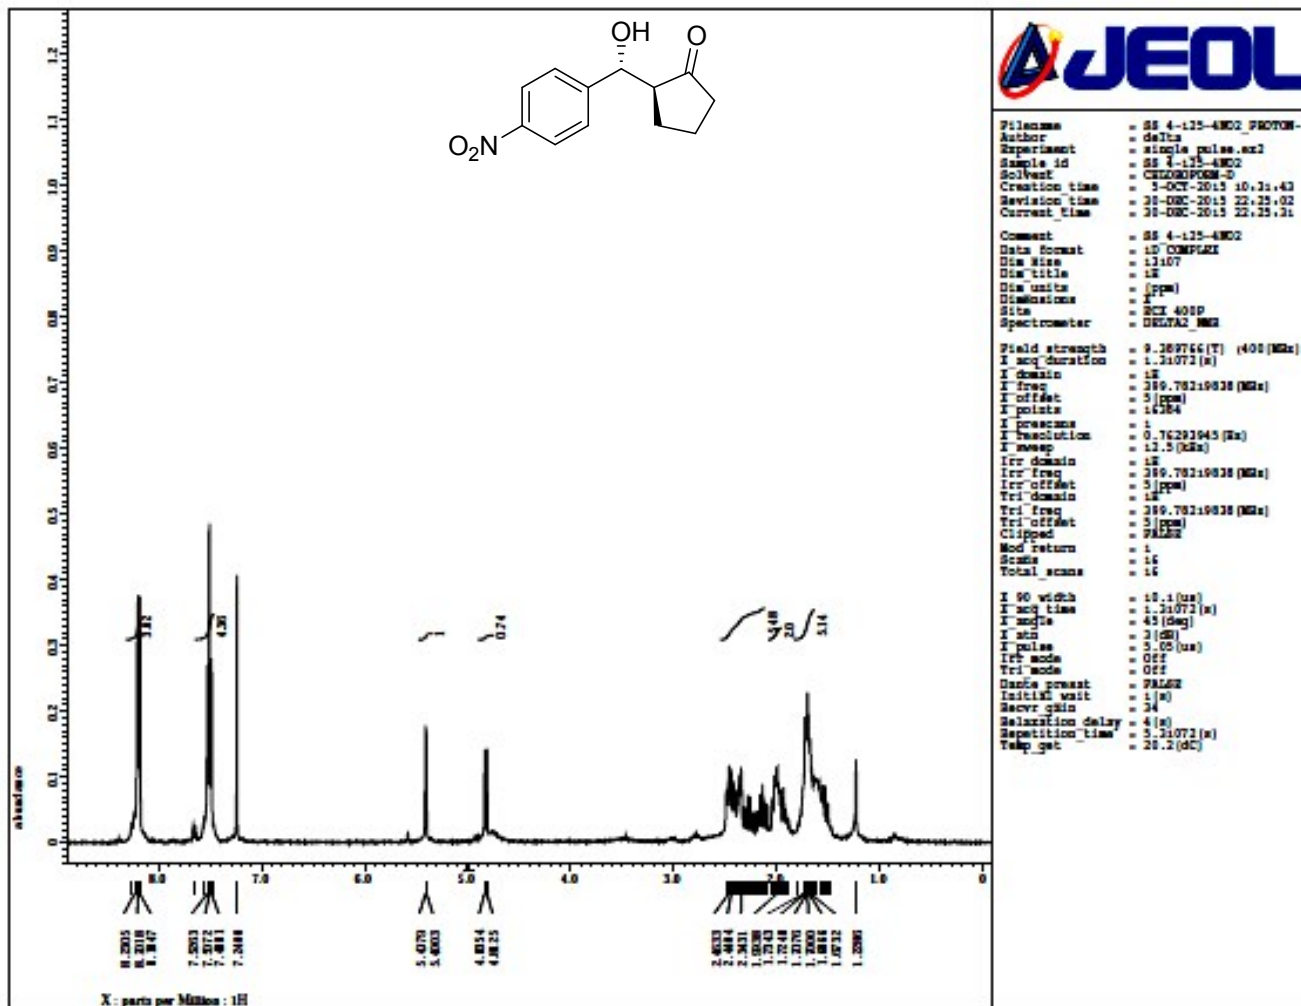

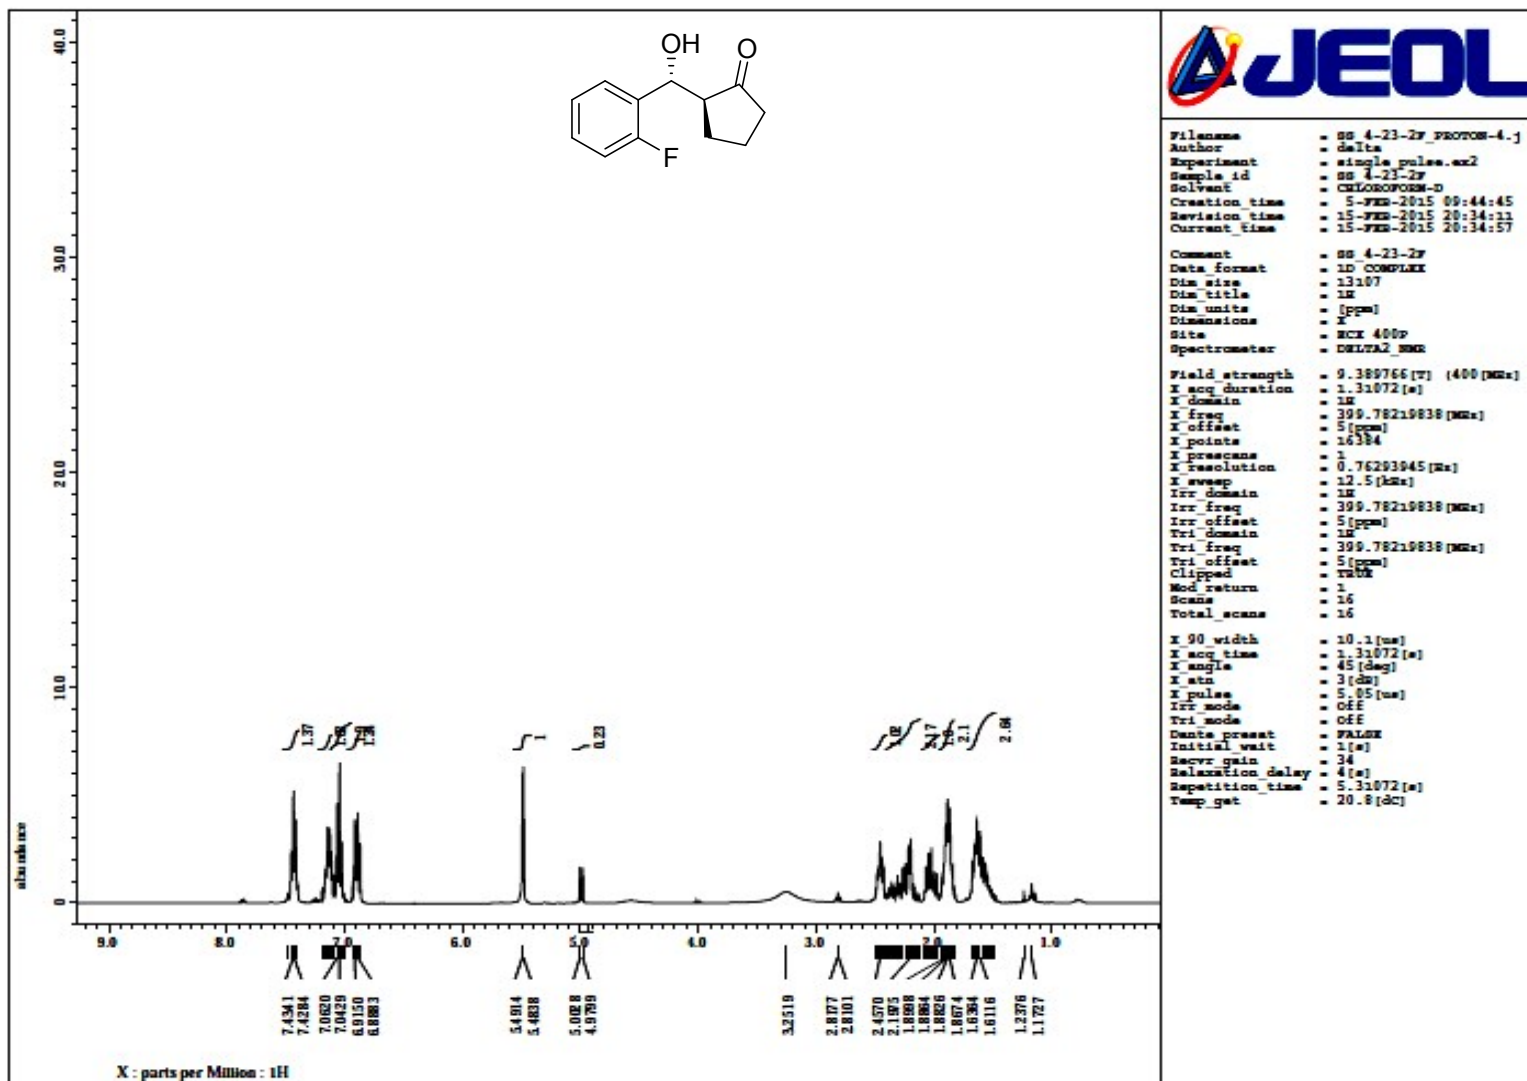



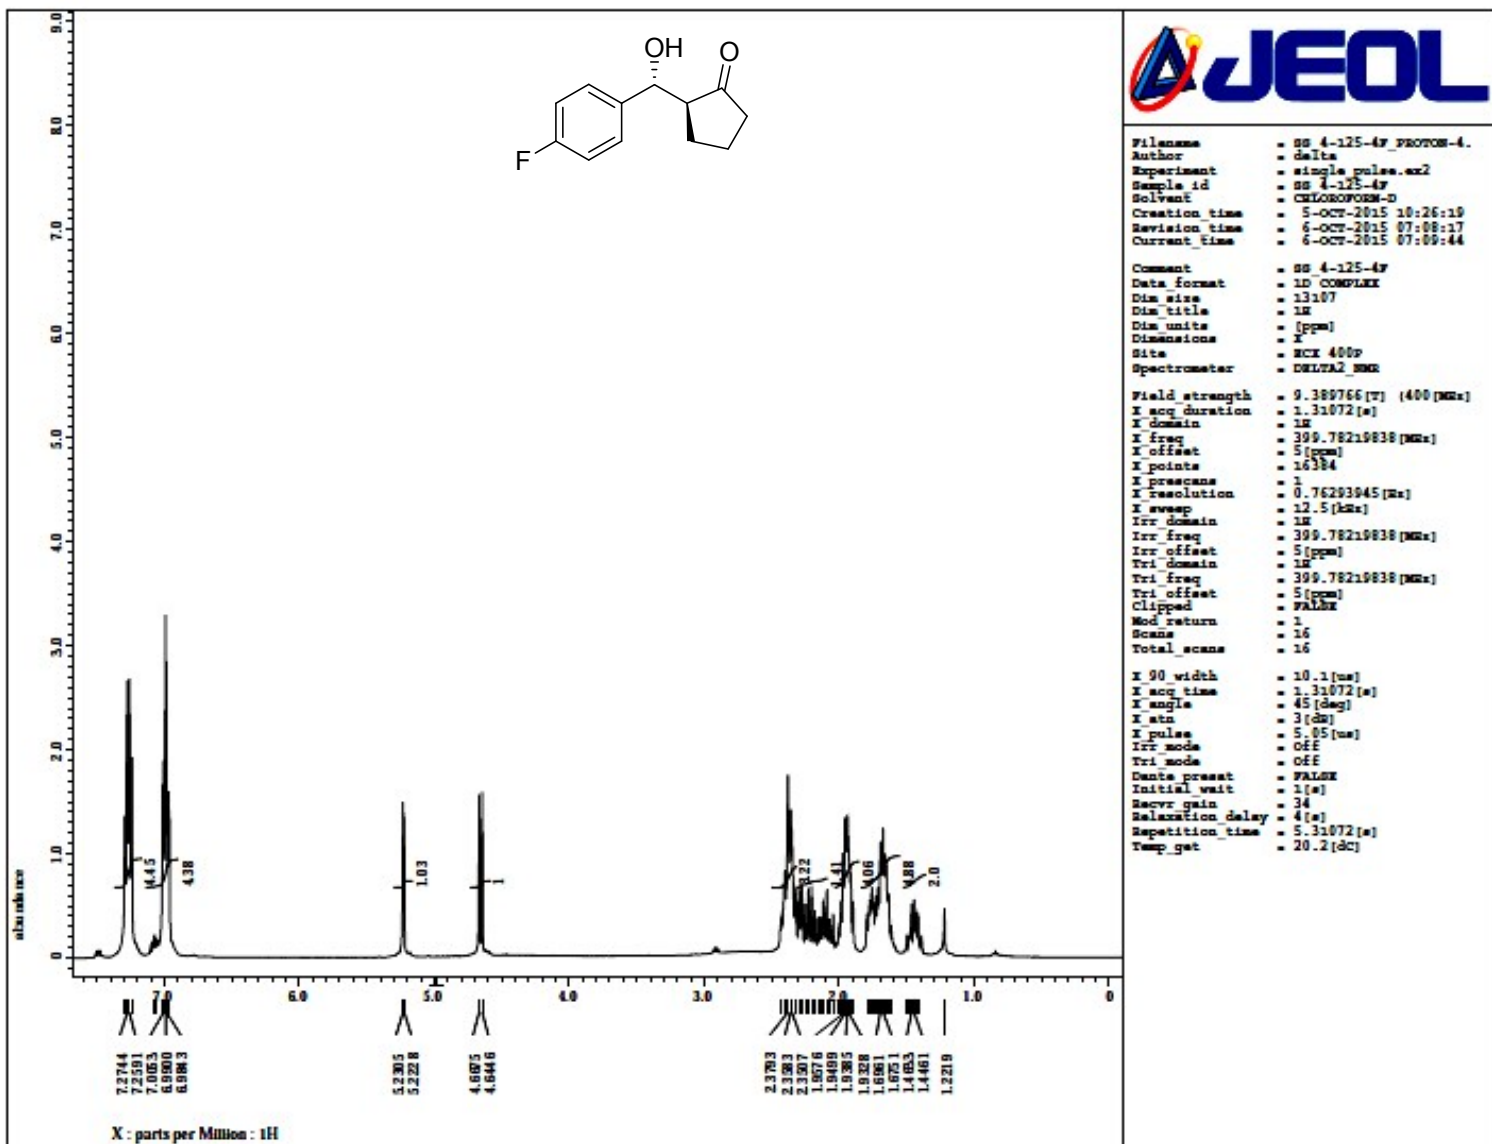

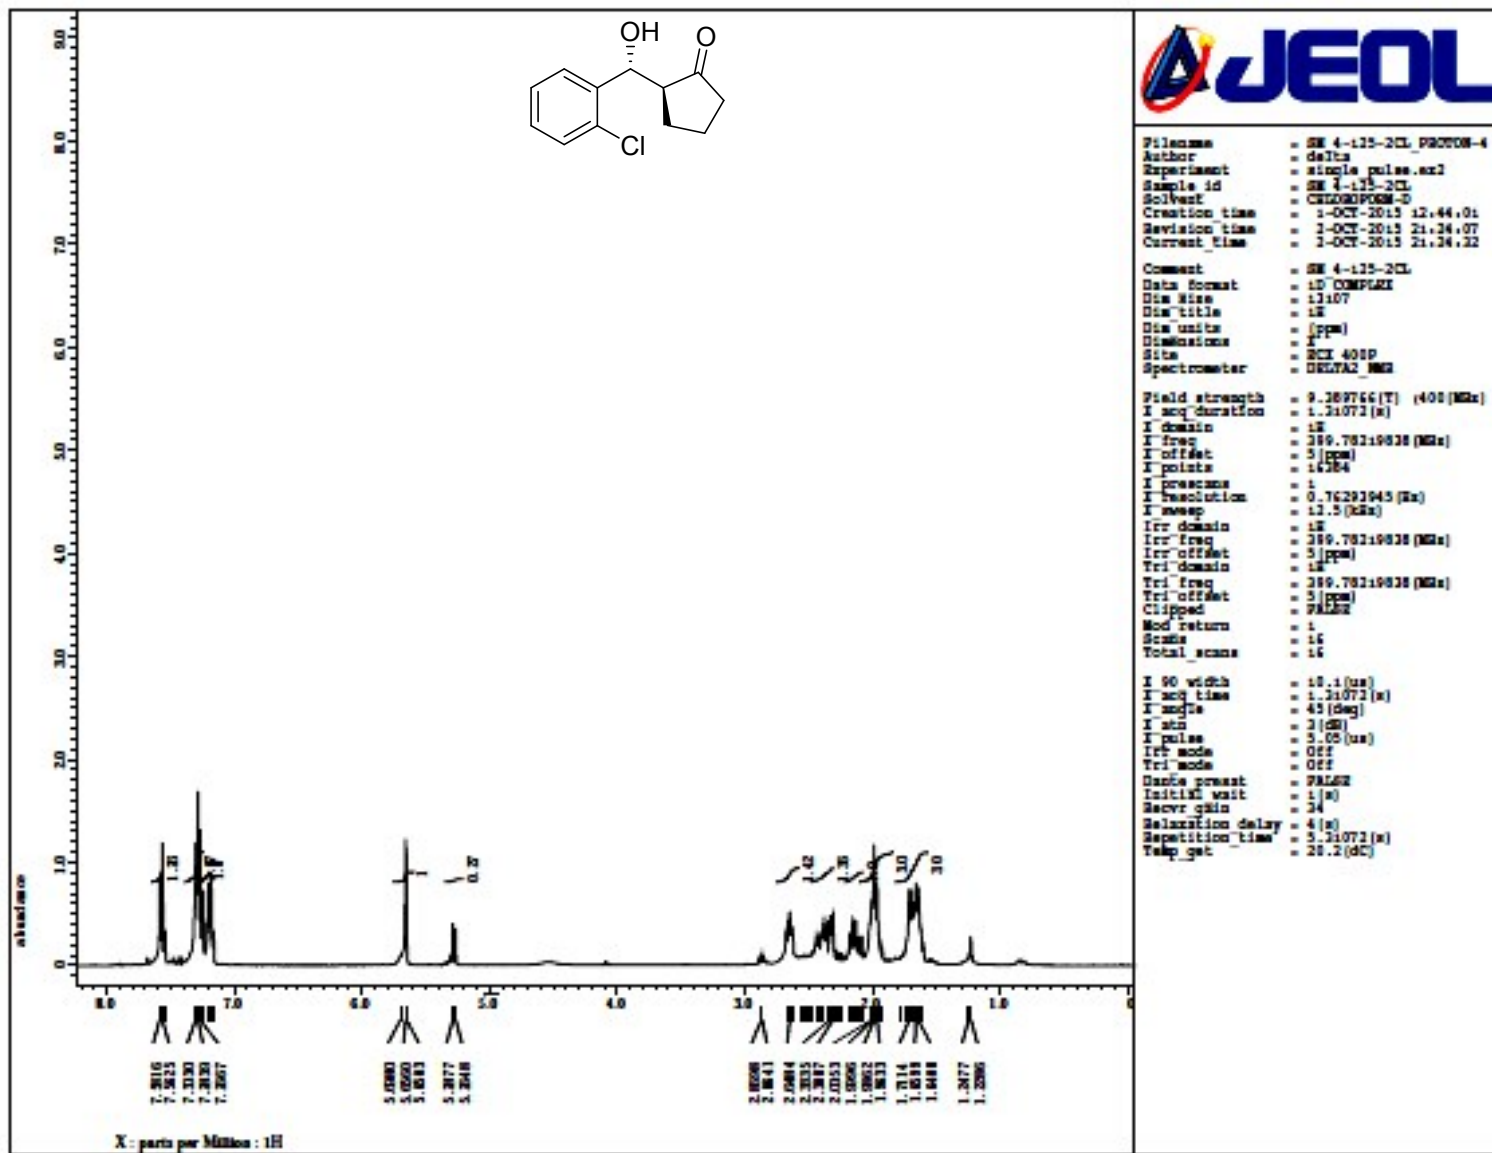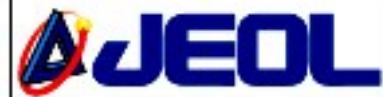

```

Filename      = SH 4-125-2CL PROTON-4
Author        = delta
Experiment    = single pulse.ex1
Sample id     = SH 4-125-2CL
Solvent       = CDCl3
Creation time = 1-OCT-2015 12:44:01
Revision time = 1-OCT-2015 21:24:07
Current time  = 1-OCT-2015 21:24:22

Comment       = SH 4-125-2CL
Data format   = 1D COMPARE
Daq size      = 13107
Daq title     = 1E
Daq units     = (ppm)
Dimensions    = 1
Site          = NCI 400P
Spectrometer  = DELTA 400

Field strength = 9.269766(T) (400(MHz))
F1 acq duration = 1.31073(s)
F1 domain      = 1E
F1 freq        = 399.76219038 (MHz)
F1 offset      = 5(ppm)
F1 points      = 16384
F1 prescans    = 1
F1 resolution  = 0.76292945 (Hz)
F1 sweep       = 13.5 (kHz)
F1r domain     = 1E
F1r freq       = 399.76219038 (MHz)
F1r offset     = 5(ppm)
F1r points     = 16384
F1r prescans   = 1
F1r resolution = 0.76292945 (Hz)
F1r sweep      = 13.5 (kHz)
F1r domain     = 1E
F1r freq       = 399.76219038 (MHz)
F1r offset     = 5(ppm)
Clipped       = FALSE
Mod return    = 1
Scans         = 16
Total scans   = 16

F2 width      = 10.1(us)
F2 acq time   = 1.31073(s)
F2 angle      = 45(deg)
F2 steps     = 2(s)
F2 pulse     = 5.05(us)
F2r mode     = Off
F2r mode     = Off
Data presat  = FALSE
T1 delay     = 1(s)
Recvr gain   = 34
Relaxation delay = 4(s)
Repetition time = 3.31073(s)
Temp set     = 20.2(°C)
  
```

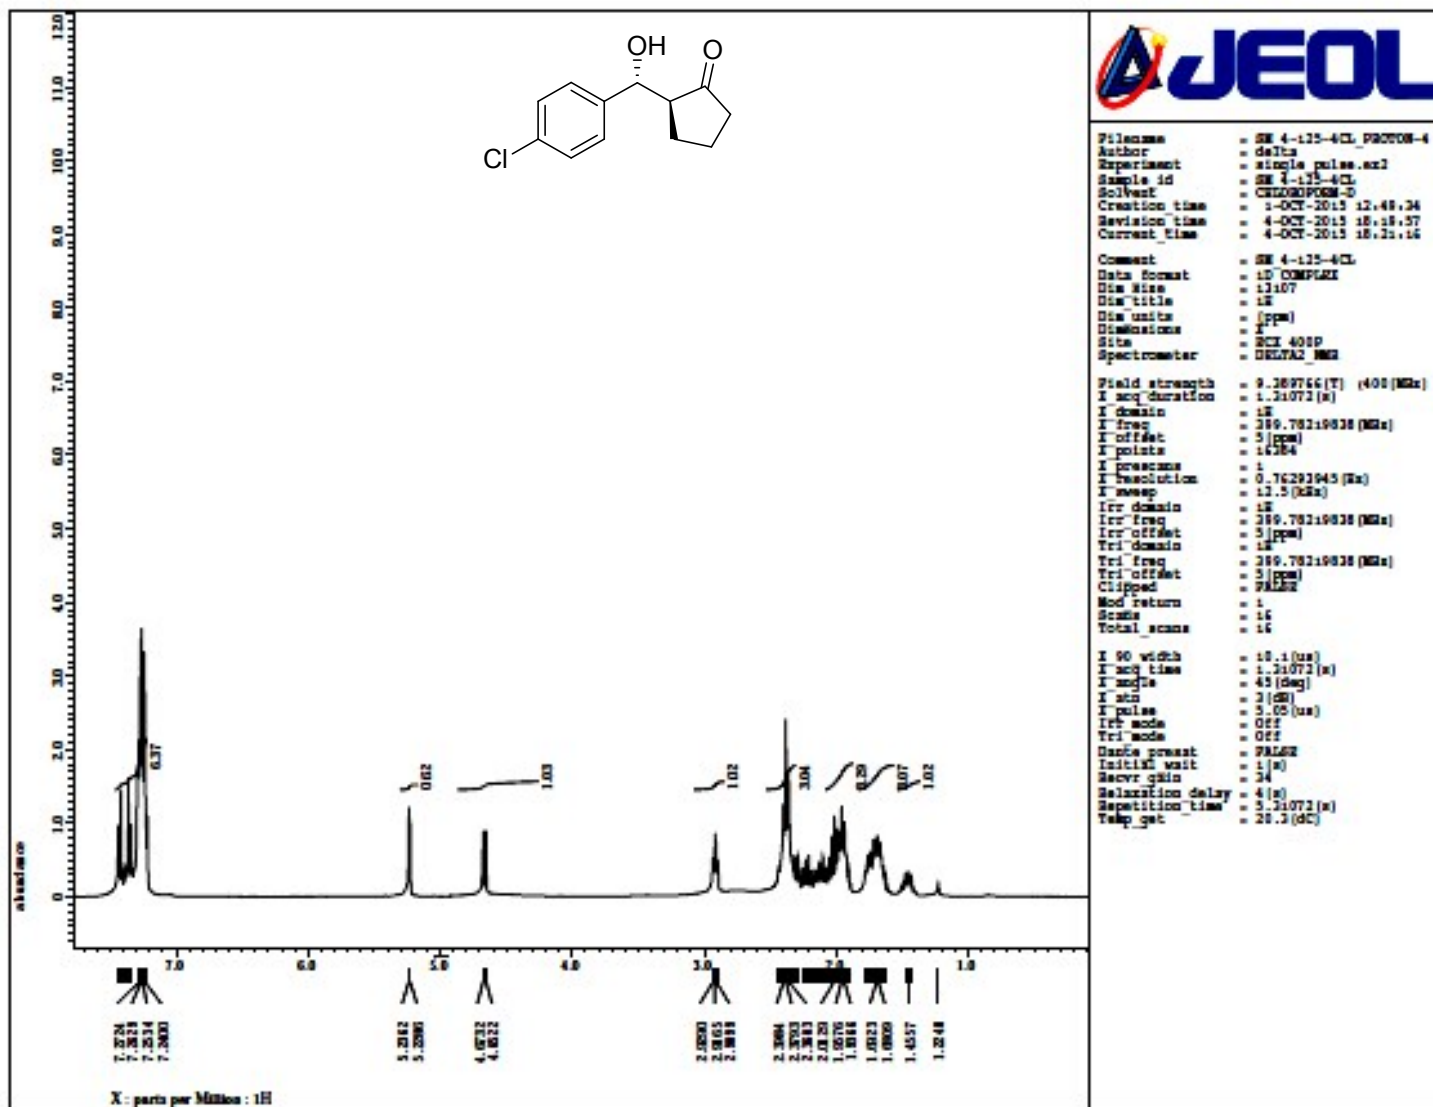

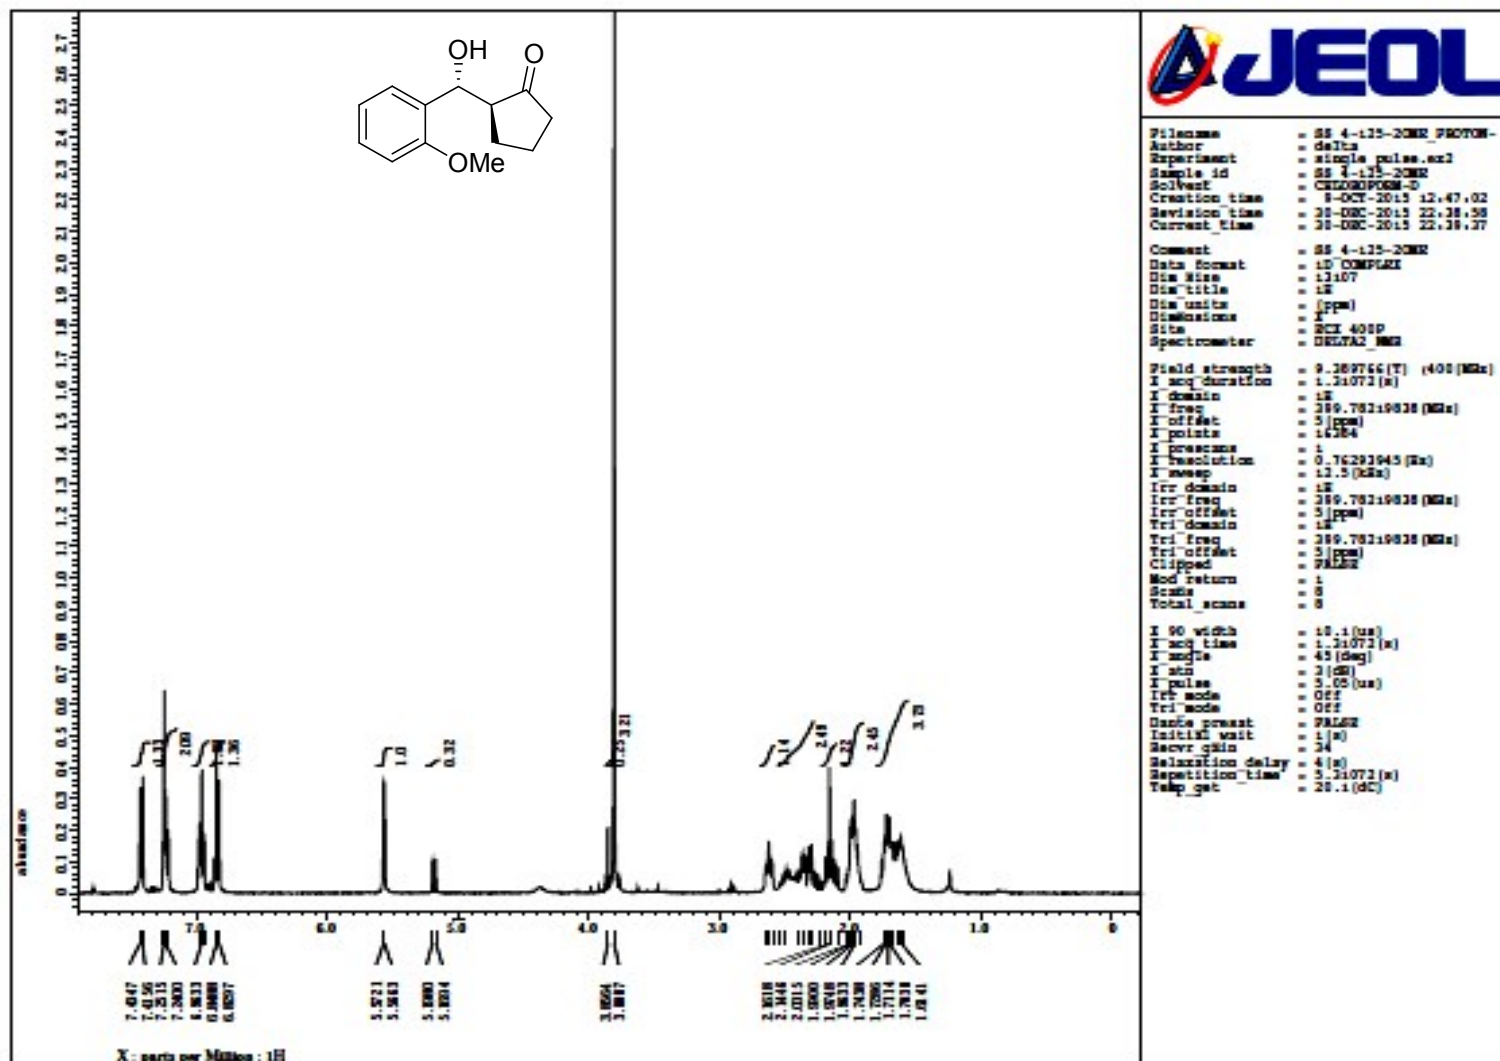

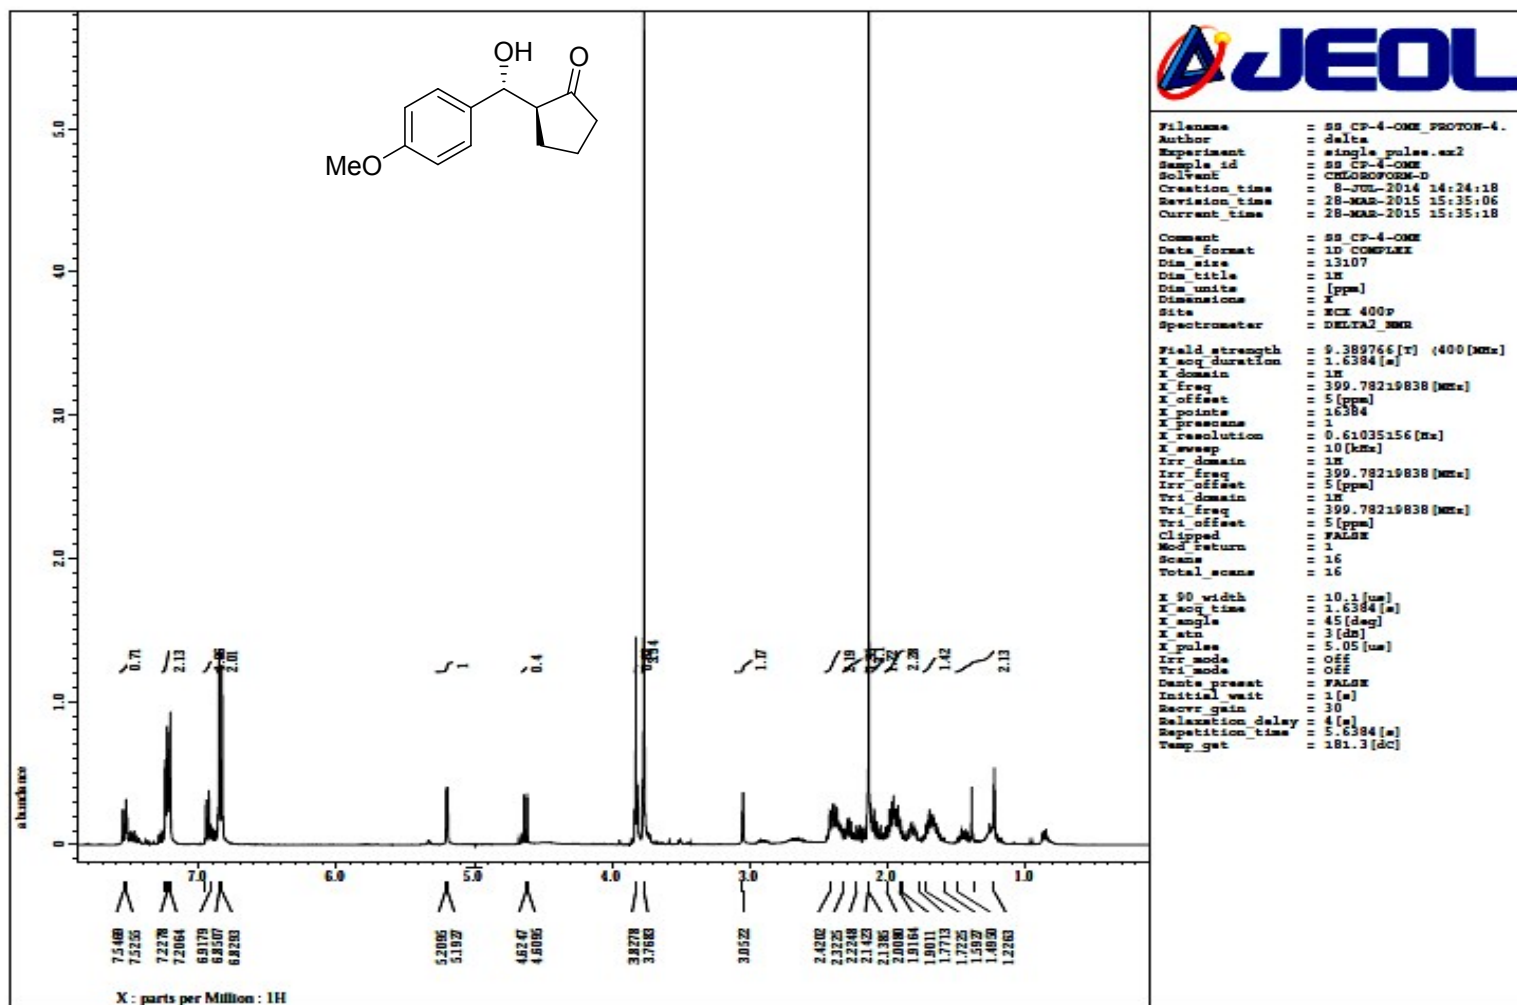

## HPLC Chromatogram of the aldol products

### 2-[Hydroxy-(4-nitro-phenyl)-methyl]-cyclohexanone (Table 1, entry 2)

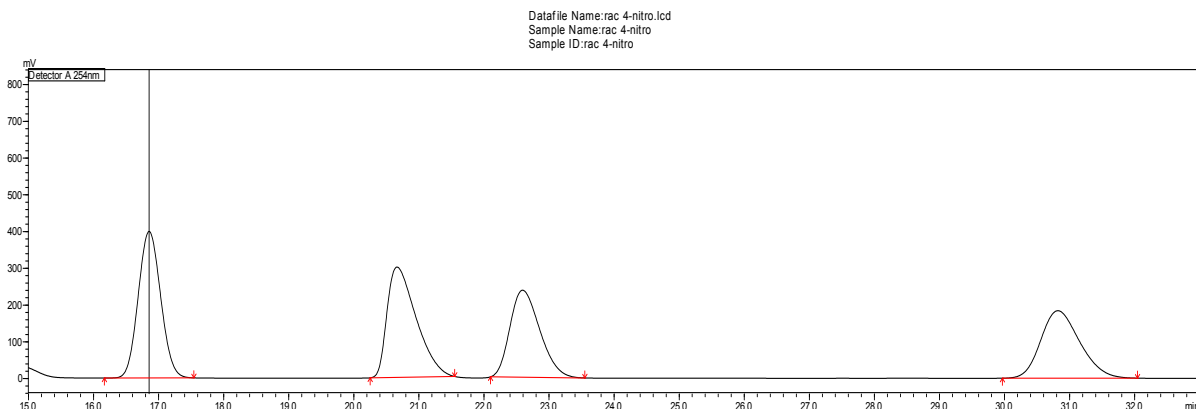

| Peak  | Ret. Time | Area     | Height  | Area%   |             |
|-------|-----------|----------|---------|---------|-------------|
| 1     | 16.855    | 9562702  | 398742  | 28.059  | <i>syn</i>  |
| 2     | 20.664    | 9318086  | 300259  | 27.341  | <i>syn</i>  |
| 3     | 22.594    | 7551949  | 236868  | 22.159  | <i>anti</i> |
| 4     | 30.820    | 7648276  | 183621  | 22.441  | <i>anti</i> |
| Total |           | 34081013 | 1119490 | 100.000 |             |

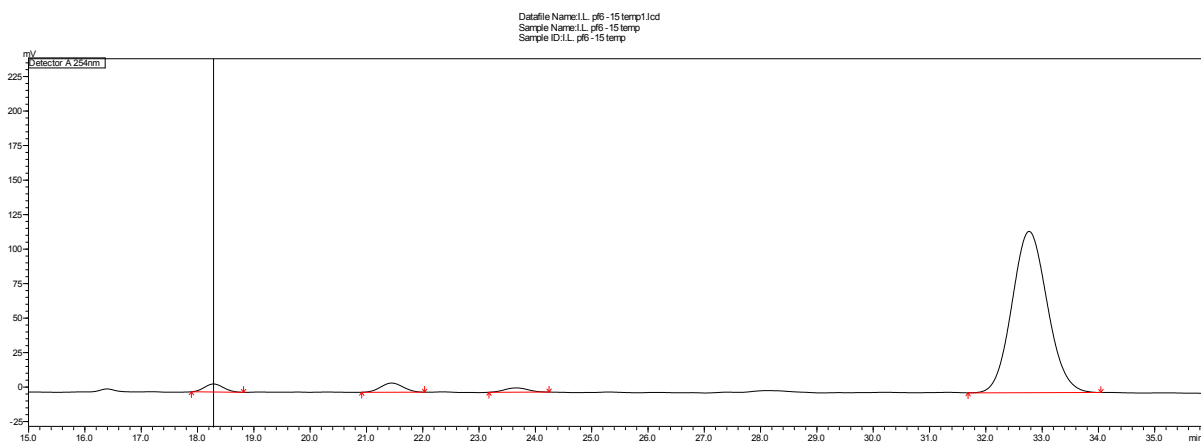

| Peak  | Ret. Time | Area    | Height | Area%   |             |
|-------|-----------|---------|--------|---------|-------------|
| 1     | 18.284    | 137353  | 5839   | 2.493   | <i>syn</i>  |
| 2     | 21.449    | 184731  | 6659   | 3.354   | <i>syn</i>  |
| 3     | 23.661    | 88253   | 3072   | 1.602   | <i>anti</i> |
| 4     | 32.768    | 5098160 | 116893 | 92.551  | <i>anti</i> |
| Total |           | 5508498 | 132463 | 100.000 |             |

## 2-[Hydroxy-(4-nitro-phenyl)-methyl]-cyclohexanone (Table 1, entry 5)

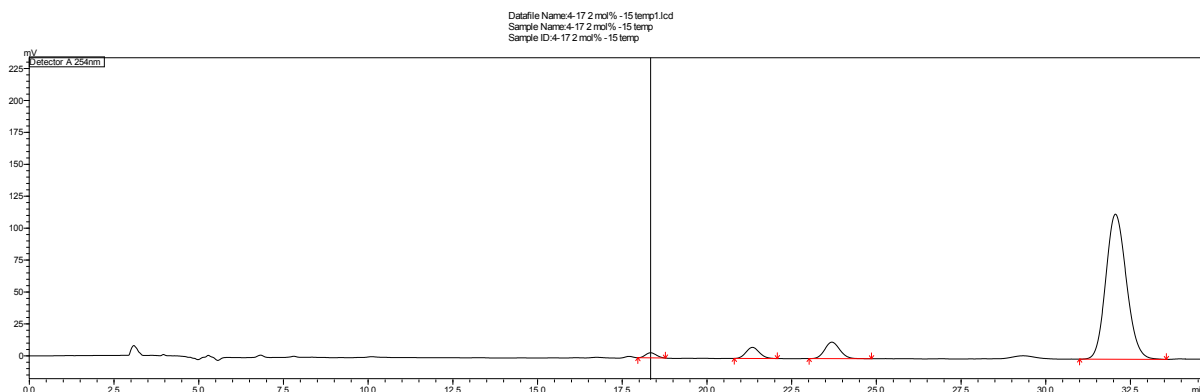

| Peak  | Ret. Time | Area    | Height | Area%   |             |
|-------|-----------|---------|--------|---------|-------------|
| 1     | 18.336    | 89142   | 4033   | 1.612   | <i>syn</i>  |
| 2     | 21.341    | 240374  | 8705   | 4.346   | <i>syn</i>  |
| 3     | 23.687    | 399144  | 12886  | 7.217   | <i>anti</i> |
| 4     | 32.056    | 4802012 | 113602 | 86.825  | <i>anti</i> |
| Total |           | 5530672 | 139227 | 100.000 |             |

## 2-[Hydroxy-(4-nitro-phenyl)-methyl]-cyclohexanone (Table 1, entry 6)

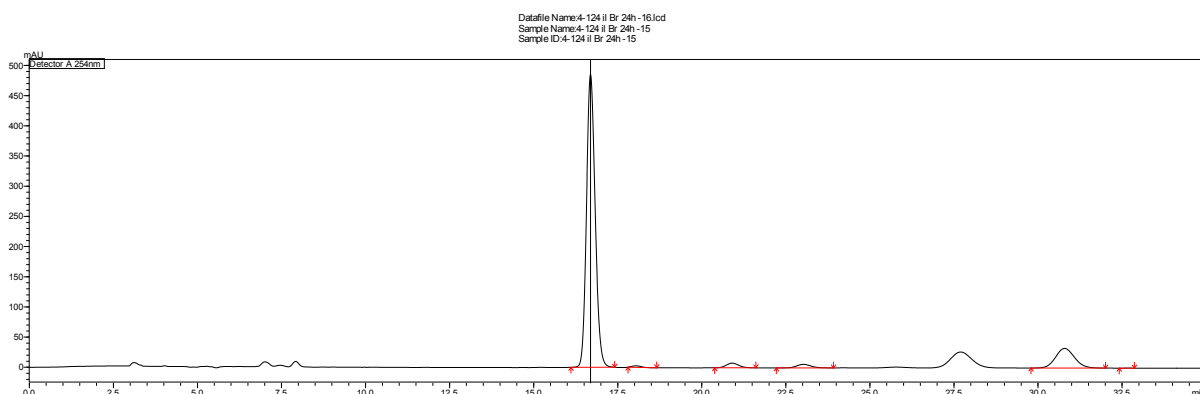

| Peak  | Ret. Time | Area    | Height | Area%   |                      |
|-------|-----------|---------|--------|---------|----------------------|
| 1     | 16.691    | 8700518 | 485385 | 83.714  | 4-Nitro-benzaldehyde |
| 2     | 18.038    | 44337   | 2501   | 0.427   | <i>syn</i>           |
| 3     | 20.902    | 202882  | 7777   | 1.952   | <i>syn</i>           |
| 4     | 23.024    | 171125  | 5872   | 1.647   | <i>anti</i>          |
| 5     | 30.793    | 1273303 | 32490  | 12.251  | <i>anti</i>          |
| Total |           | 5508498 | 132463 | 100.000 |                      |

## 2-[Hydroxy(phenyl)methyl]-cyclohexanone (Table 2, entry 2)

Datafile Name: R 4-124 Ben CHONE1.lcd  
 Sample Name: R 4-124 Ben CHONE  
 Sample ID: R 4-124 Ben CHONE

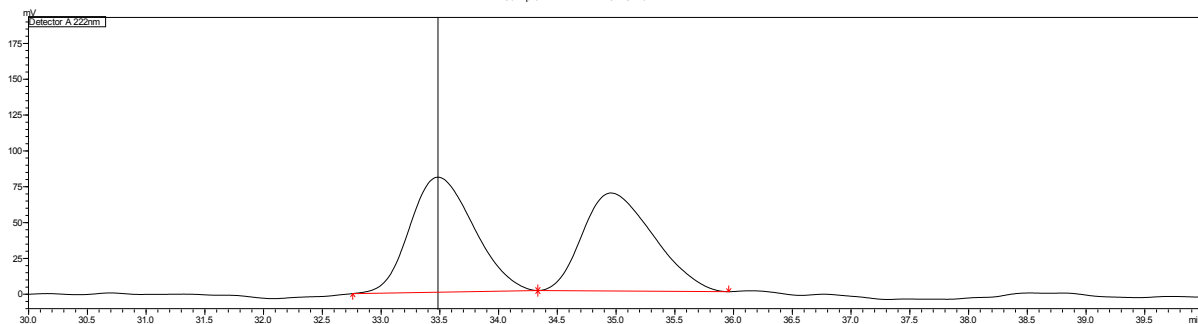

| Peak  | Ret. Time | Area    | Height | Area%   |             |
|-------|-----------|---------|--------|---------|-------------|
| 1     | 33.484    | 3038337 | 80257  | 51.433  | <i>anti</i> |
| 2     | 34.957    | 2869000 | 68351  | 48.567  | <i>anti</i> |
| Total |           | 5907337 | 148607 | 100.000 |             |

Datafile Name: 4-124 Ben CHONE1.lcd  
 Sample Name: 4-124 Ben CHONE  
 Sample ID: 4-124 Ben CHONE

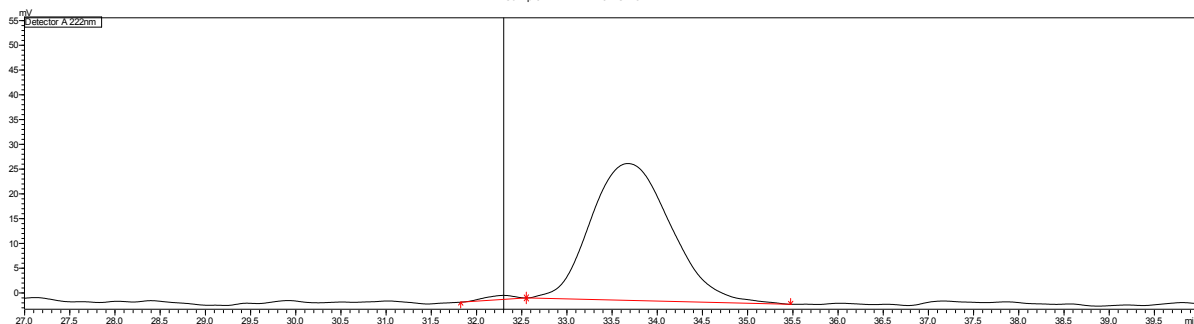

| Peak  | Ret. Time | Area    | Height | Area%   |             |
|-------|-----------|---------|--------|---------|-------------|
| 1     | 32.300    | 19016   | 811    | 1.104   | <i>anti</i> |
| 2     | 33.676    | 1703268 | 27641  | 98.896  | <i>anti</i> |
| Total |           | 1722283 | 28452  | 100.000 |             |

**2-[Hydroxy(naphthyl)methyl]-cyclohexanone (Table 2, entry 2)**



Datafile Name: R 4-124 Nap CHONE1.lcd  
 Sample Name: R 4-124 Nap CHONE  
 Sample ID: R 4-124 Nap CHONE

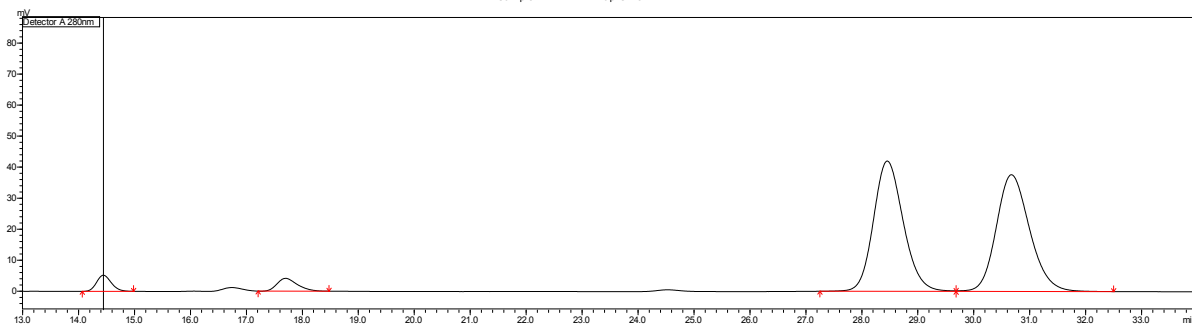

| Peak | Ret. Time | Area    | Height | Area%   |             |
|------|-----------|---------|--------|---------|-------------|
| 1    | 14.443    | 95221   | 5205   | 2.871   | <i>syn</i>  |
| 2    | 17.700    | 104058  | 4130   | 3.138   | <i>syn</i>  |
| 3    | 28.454    | 1555667 | 42020  | 46.908  | <i>anti</i> |
| 4    | 30.674    | 1561440 | 37647  | 47.083  | <i>anti</i> |
|      | Total     | 3316387 | 89002  | 100.000 |             |

Datafile Name: 4-124 Nap CHONE1.lcd  
 Sample Name: 4-124 Nap CHONE  
 Sample ID: 4-124 Nap CHONE

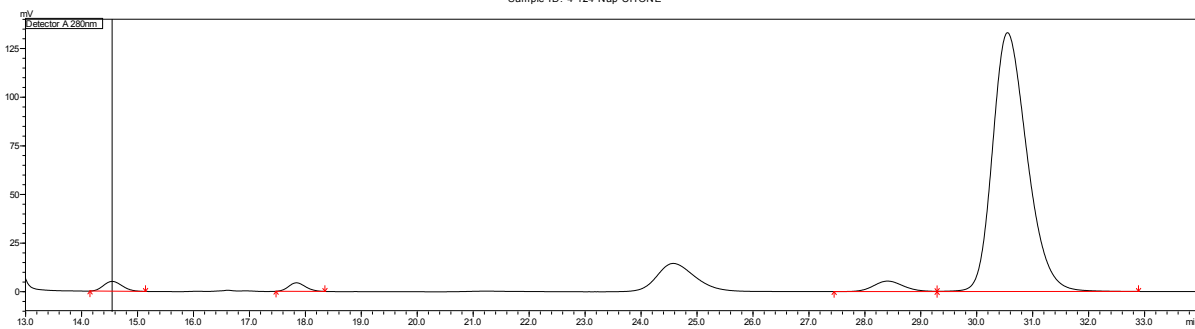

| Peak | Ret. Time | Area    | Height | Area%   |             |
|------|-----------|---------|--------|---------|-------------|
| 1    | 14.546    | 117229  | 5031   | 1.921   | <i>syn</i>  |
| 2    | 17.840    | 92749   | 4393   | 1.520   | <i>syn</i>  |
| 3    | 28.407    | 201002  | 5384   | 3.293   | <i>anti</i> |
| 4    | 30.550    | 5692358 | 133053 | 93.266  | <i>anti</i> |
|      | Total     | 6103339 | 147862 | 100.000 |             |

**2-[Hydroxy-(2-nitro-phenyl)-methyl]-cyclohexanone (Table 2, entry 3)**

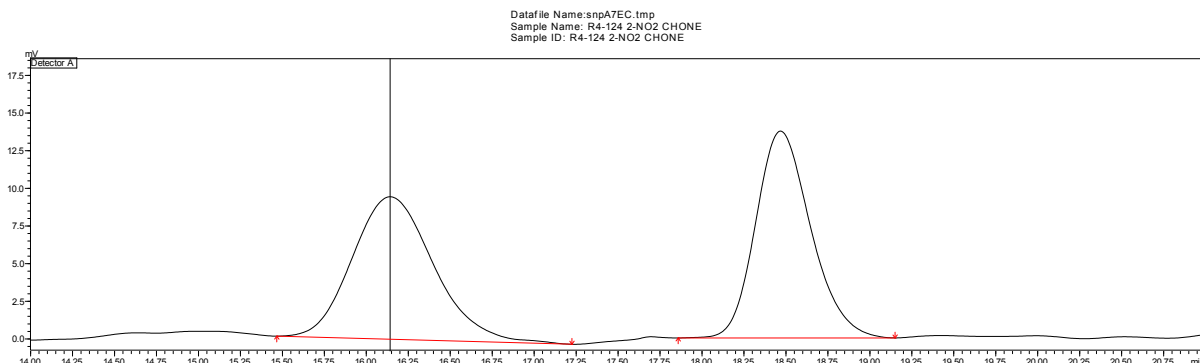

| Peak  | Ret. Time | Area   | Height | Area%   |             |
|-------|-----------|--------|--------|---------|-------------|
| 1     | 16.142    | 318790 | 9465   | 50.409  | <i>anti</i> |
| 2     | 18.468    | 313621 | 13739  | 49.591  | <i>anti</i> |
| Total |           | 632411 | 23204  | 100.000 |             |

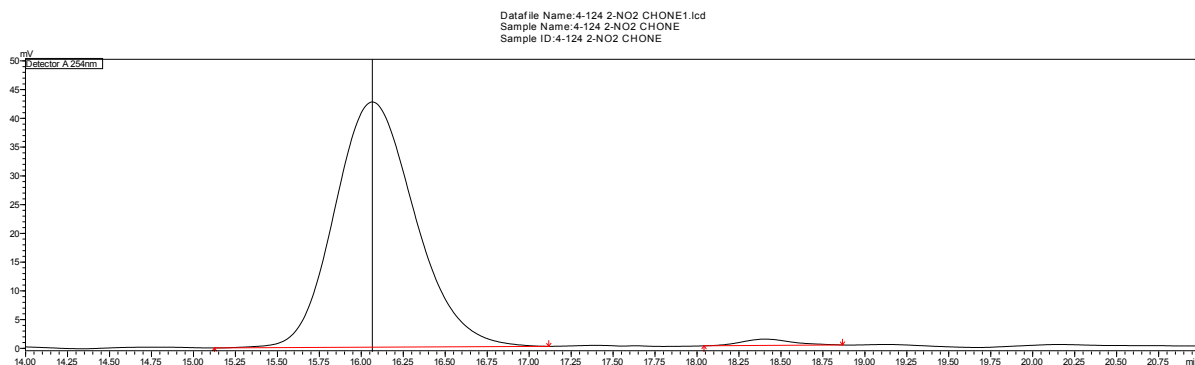

| Peak  | Ret. Time | Area    | Height | Area%   |             |
|-------|-----------|---------|--------|---------|-------------|
| 1     | 16.066    | 1420282 | 42657  | 98.394  | <i>anti</i> |
| 2     | 18.403    | 23178   | 1107   | 1.606   | <i>anti</i> |
| Total |           | 1443459 | 43764  | 100.000 |             |

**2-[Hydroxy-(2-fluoro-phenyl)methyl]-cyclohexanone (Table 2, entry 4)**

Datafile Name: R 4-124 2F CHONE2.lcd  
 Sample Name: R 4-124 2F CHONE  
 Sample ID: R 4-124 2F CHONE

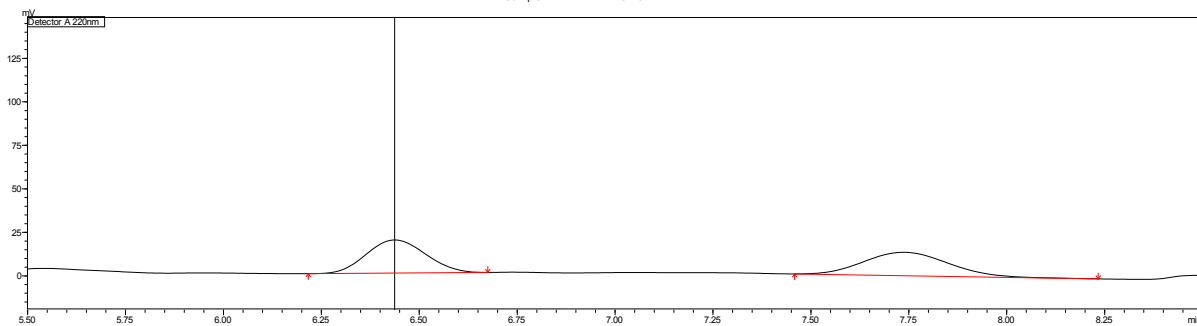

| Peak  | Ret. Time | Area   | Height | Area%   |             |
|-------|-----------|--------|--------|---------|-------------|
| 1     | 6.437     | 200624 | 19059  | 49.721  | <i>anti</i> |
| 2     | 7.736     | 202875 | 13468  | 50.279  | <i>anti</i> |
| Total |           | 403499 | 32528  | 100.000 |             |

Datafile Name: 4-124 2F CHONE1.lcd  
 Sample Name: 4-124 2F CHONE  
 Sample ID: 4-124 2F CHONE

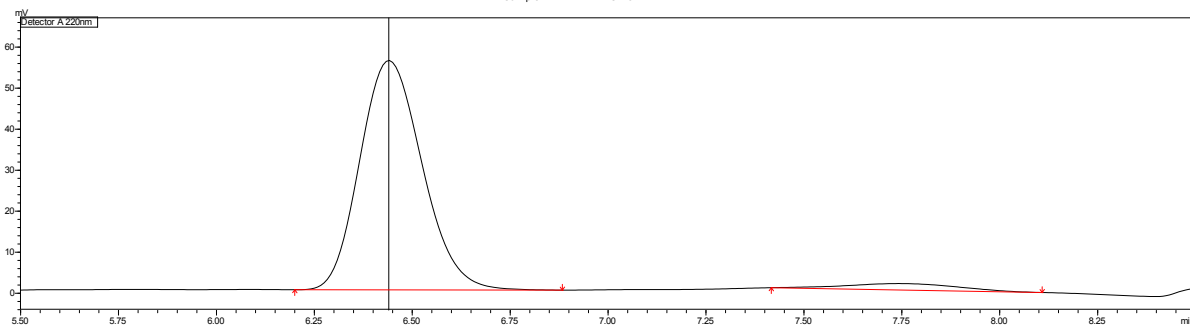

| Peak  | Ret. Time | Area   | Height | Area%   |             |
|-------|-----------|--------|--------|---------|-------------|
| 1     | 6.440     | 619122 | 55938  | 95.242  | <i>anti</i> |
| 2     | 7.741     | 30928  | 1559   | 4.758   | <i>anti</i> |
| Total |           | 650050 | 57496  | 100.000 |             |

**2-[Hydroxy-(4-fluoro-phenyl)methyl]-cyclohexanone (Table 2, entry 5)**

Datafile Name: R 4-124 4F od h1.lcd  
 Sample Name: R 4-124 4F od h  
 Sample ID: R 4-124 4F od h

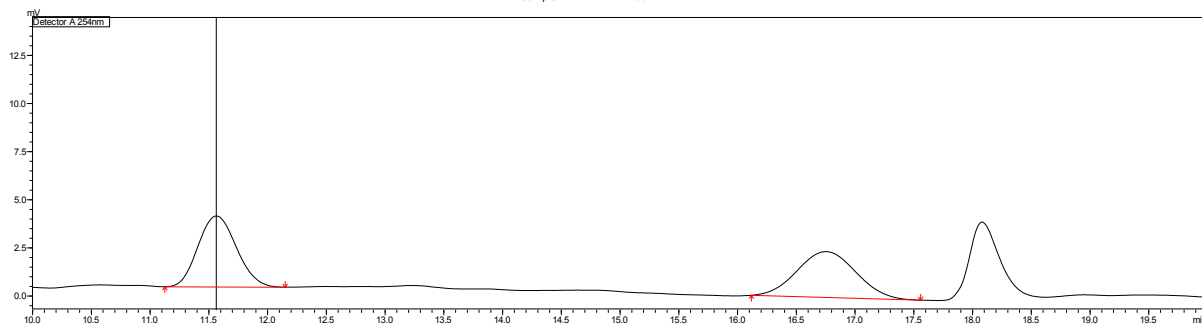

| Peak | Ret. Time | Area   | Height | Area%   |             |
|------|-----------|--------|--------|---------|-------------|
| 1    | 11.564    | 83742  | 3688   | 50.245  | <i>anti</i> |
| 2    | 16.749    | 82926  | 2379   | 49.755  | <i>anti</i> |
|      | Total     | 166668 | 6067   | 100.000 |             |

Datafile Name: 4-124 4F od h2.lcd  
 Sample Name: 4-124 4F od h  
 Sample ID: 4-124 4F od h

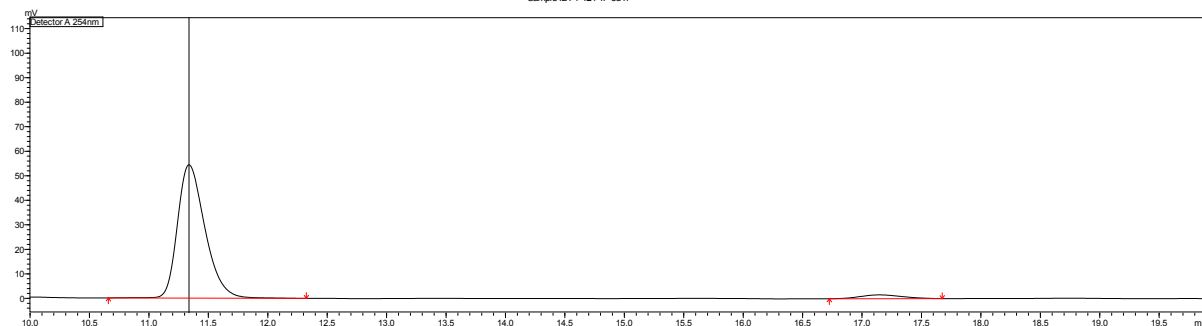

| Peak | Ret. Time | Area   | Height | Area%   |             |
|------|-----------|--------|--------|---------|-------------|
| 1    | 11.337    | 874282 | 54356  | 96.552  | <i>anti</i> |
| 2    | 17.147    | 31220  | 1404   | 3.448   | <i>anti</i> |
|      | Total     | 905502 | 55759  | 100.000 |             |

**2-[Hydroxy-(2-chloro-phenyl)methyl]-cyclohexanone (Table 2, entry 6)**

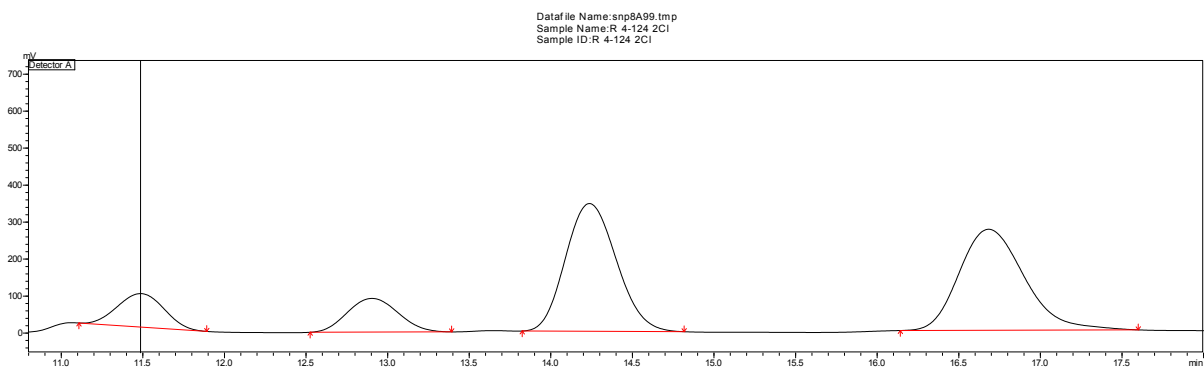

| Peak  | Ret. Time | Area     | Height | Area%   |             |
|-------|-----------|----------|--------|---------|-------------|
| 1     | 11.486    | 1790429  | 90477  | 9.513   | <i>syn</i>  |
| 2     | 12.904    | 1972025  | 91012  | 10.477  | <i>syn</i>  |
| 3     | 14.237    | 7494487  | 345484 | 39.818  | <i>anti</i> |
| 4     | 16.683    | 7564779  | 273103 | 40.192  | <i>anti</i> |
| Total |           | 18821719 | 800077 | 100.000 |             |

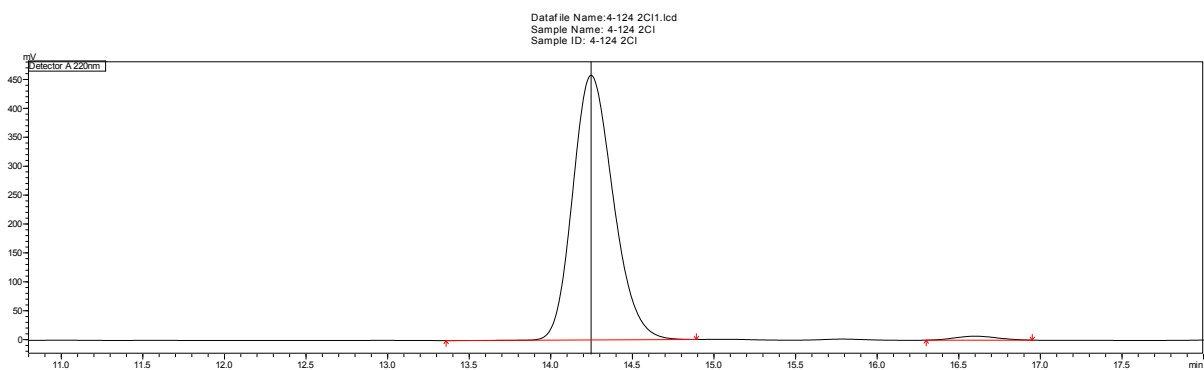

| Peak  | Ret. Time | Area    | Height | Area%   |             |
|-------|-----------|---------|--------|---------|-------------|
| 1     | 14.247    | 7886290 | 457822 | 98.443  | <i>anti</i> |
| 2     | 16.599    | 124720  | 6868   | 1.557   | <i>anti</i> |
| Total |           | 8011010 | 464690 | 100.000 |             |

**2-[Hydroxy-(4-chloro-phenyl)methyl]-cyclohexanone (Table 2, entry 7)**

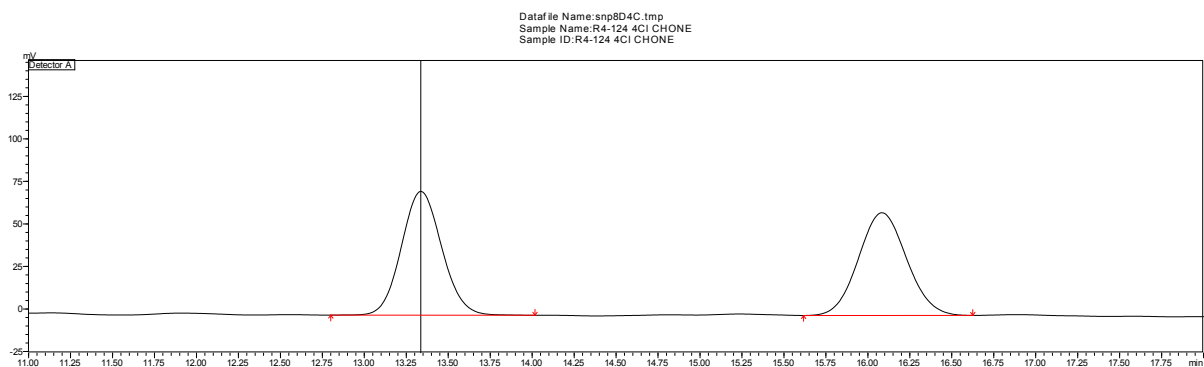

| Peak  | Ret. Time | Area    | Height | Area%   |             |
|-------|-----------|---------|--------|---------|-------------|
| 1     | 13.337    | 1220111 | 72730  | 50.276  | <i>anti</i> |
| 2     | 16.084    | 1206725 | 60377  | 49.724  | <i>anti</i> |
| Total |           | 2426836 | 133107 | 100.000 |             |

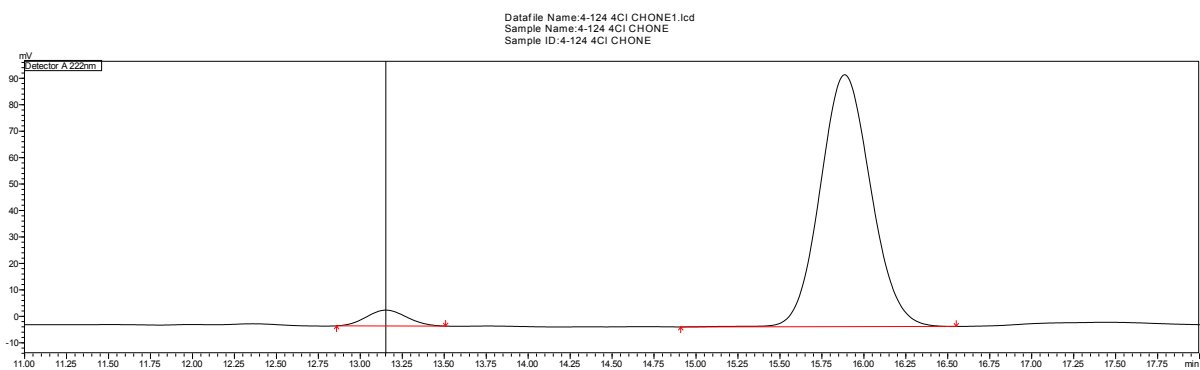

| Peak  | Ret. Time | Area    | Height | Area%   |             |
|-------|-----------|---------|--------|---------|-------------|
| 1     | 13.152    | 99858   | 5984   | 4.762   | <i>anti</i> |
| 2     | 15.886    | 1997216 | 95253  | 95.238  | <i>anti</i> |
| Total |           | 2097074 | 101237 | 100.000 |             |

**2-[Hydroxy-(2-bromo-phenyl)methyl]-cyclohexanone (Table 2, entry 8)**

Datafile Name: R 2Br CHONE2.lcd  
 Sample Name: R 2Br CHONE  
 Sample ID: R 2Br CHONE

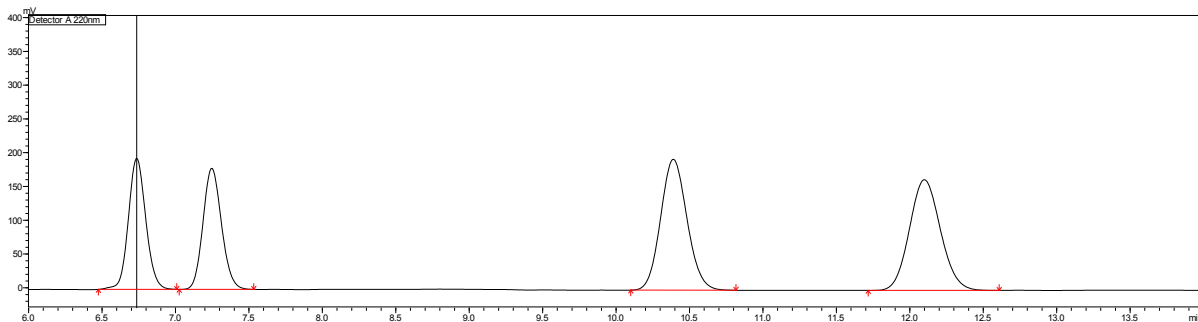

| Peak | Ret. Time | Area    | Height | Area%   |             |
|------|-----------|---------|--------|---------|-------------|
| 1    | 6.736     | 1601045 | 193939 | 19.995  | <i>syn</i>  |
| 2    | 7.247     | 1570953 | 179235 | 19.619  | <i>syn</i>  |
| 3    | 10.389    | 2425950 | 193818 | 30.297  | <i>anti</i> |
| 4    | 12.099    | 2409359 | 163901 | 30.090  | <i>anti</i> |
|      | Total     | 8007307 | 730893 | 100.000 |             |

Datafile Name: 4-124 2Br CHONE1.lcd  
 Sample Name: 4-124 2Br CHONE  
 Sample ID: 4-124 2Br CHONE

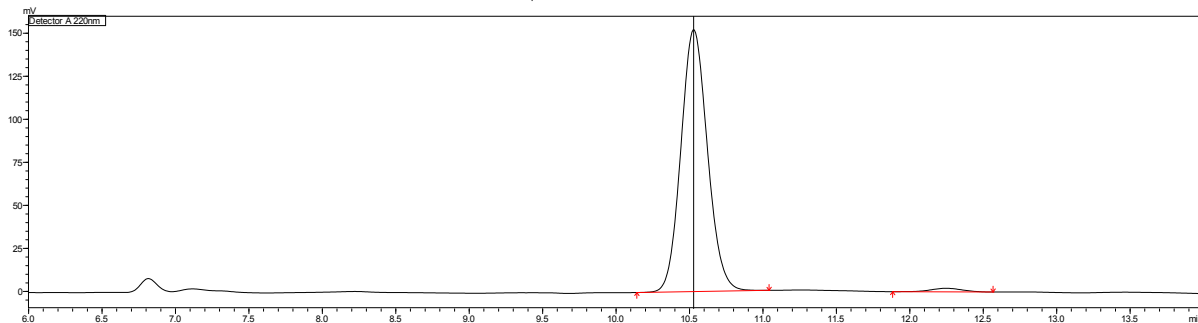

| Peak | Ret. Time | Area    | Height | Area%   |             |
|------|-----------|---------|--------|---------|-------------|
| 1    | 10.528    | 1915424 | 152111 | 98.415  | <i>anti</i> |
| 2    | 12.246    | 30841   | 2084   | 1.585   | <i>anti</i> |
|      | Total     | 1946265 | 154195 | 100.000 |             |

**2-[Hydroxy-(4-bromo-phenyl)methyl]-cyclohexanone (Table 2, entry 9)**

Datafile Name: R 4-22 4-Br.lcd  
 Sample Name: R 4-22 4-Br  
 Sample ID: R 4-22 4-Br

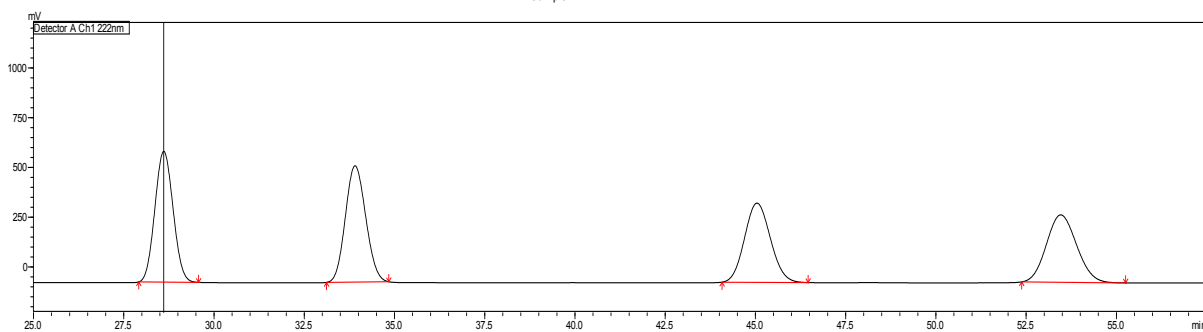

| Peak  | Ret. Time | Area     | Height  | Area%   |             |
|-------|-----------|----------|---------|---------|-------------|
| 1     | 28.608    | 23076716 | 657179  | 26.970  | <i>syn</i>  |
| 2     | 33.907    | 22969006 | 584587  | 26.844  | <i>syn</i>  |
| 3     | 45.043    | 19835022 | 398245  | 23.181  | <i>anti</i> |
| 4     | 53.459    | 19684507 | 338683  | 23.005  | <i>anti</i> |
| Total |           | 85565250 | 1978694 | 100.000 |             |

Datafile Name: 4-124 4Br CHONE2.lcd  
 Sample Name: 4-124 4Br CHONE  
 Sample ID: 4-124 4Br CHONE

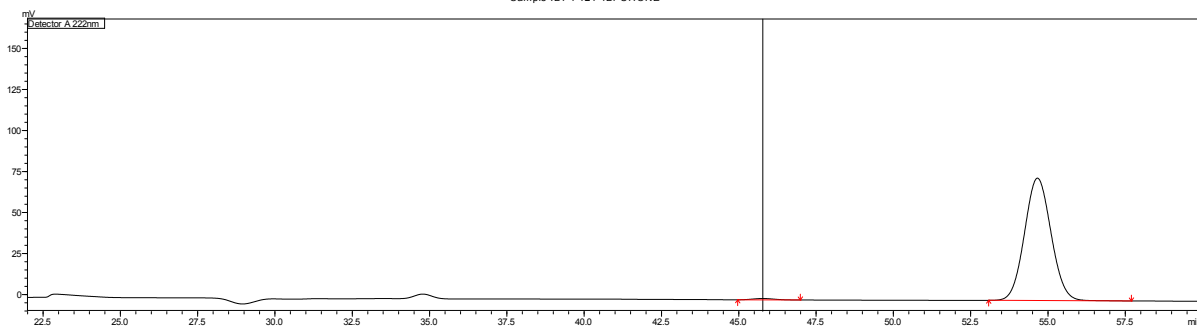

| Peak  | Ret. Time | Area    | Height | Area%   |             |
|-------|-----------|---------|--------|---------|-------------|
| 1     | 45.776    | 39428   | 817    | 0.878   | <i>anti</i> |
| 2     | 54.660    | 4453109 | 74635  | 99.122  | <i>anti</i> |
| Total |           | 4492538 | 75452  | 100.000 |             |

**2-[Hydroxy-(2-methoxy-phenyl)methyl]-cyclohexanone (Table 2, entry 10)**



Datafile Name: R4-124 2OMe CHONE1.lcd  
 Sample Name: R4-124 2OMe CHONE  
 Sample ID: R4-124 2OMe CHONE

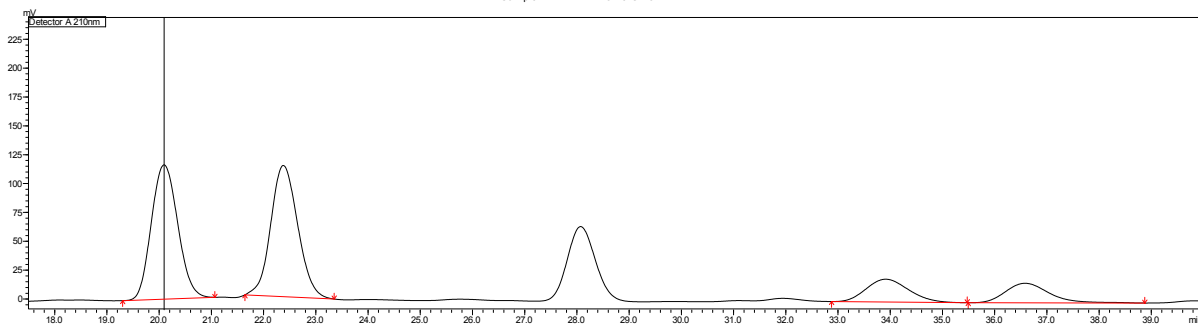

| Peak | Ret. Time | Area     | Height | Area%   |             |
|------|-----------|----------|--------|---------|-------------|
| 1    | 20.094    | 4092131  | 116323 | 39.806  | <i>syn</i>  |
| 2    | 22.377    | 4084212  | 113590 | 39.729  | <i>syn</i>  |
| 3    | 33.912    | 1113897  | 19756  | 10.835  | <i>anti</i> |
| 4    | 36.582    | 989875   | 16941  | 9.629   | <i>anti</i> |
|      | Total     | 10280116 | 266611 | 100.000 |             |

Datafile Name: 4-124 2OMe CHONE2.lcd  
 Sample Name: 4-124 2OMe CHONE  
 Sample ID: 4-124 2OMe CHONE

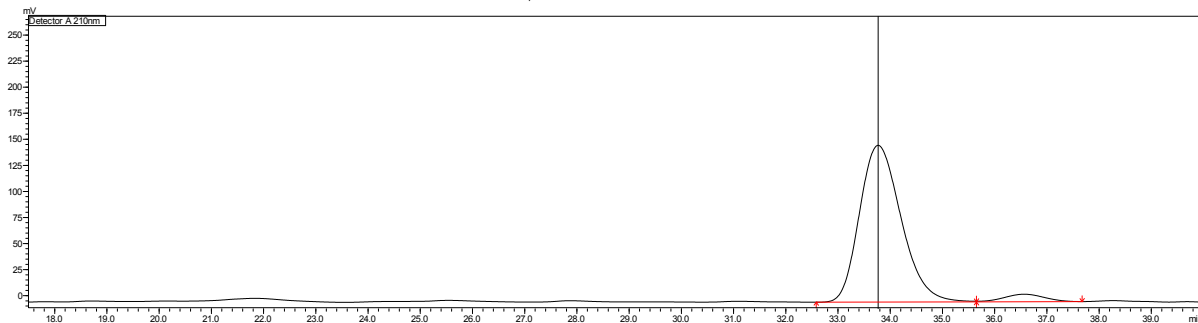

| Peak | Ret. Time | Area    | Height | Area%   |             |
|------|-----------|---------|--------|---------|-------------|
| 1    | 33.768    | 8324265 | 150418 | 95.563  | <i>anti</i> |
| 2    | 36.566    | 386453  | 7206   | 4.437   | <i>anti</i> |
|      | Total     | 8710718 | 157624 | 100.000 |             |

**2-[Hydroxy-(4-methoxy-phenyl)methyl]-cyclohexanone (Table 2, entry 11)**

Datafile Name: snpD10D.tmp  
 Sample Name: R 4-ome CH  
 Sample ID: R 4-ome CH

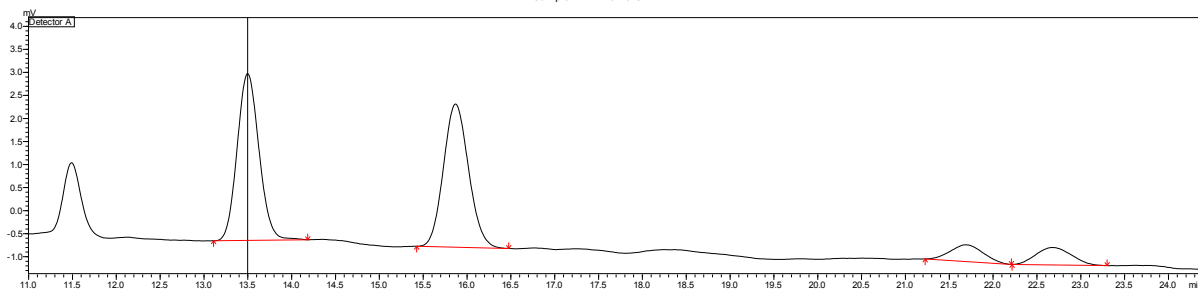

| Peak | Ret. Time | Area   | Height | Area%   |             |
|------|-----------|--------|--------|---------|-------------|
| 1    | 13.498    | 62822  | 3619   | 43.320  | <i>syn</i>  |
| 2    | 15.868    | 62050  | 3109   | 42.787  | <i>syn</i>  |
| 3    | 21.685    | 9515   | 364    | 6.561   | <i>anti</i> |
| 4    | 22.669    | 10633  | 378    | 7.332   | <i>anti</i> |
|      | Total     | 145020 | 7470   | 100.000 |             |

Datafile Name: 4-ome CH -15.5 mol%1.lcd  
 Sample Name: 4-ome CH -15.5 mol%  
 Sample ID: 4-ome CH -15.5 mol%

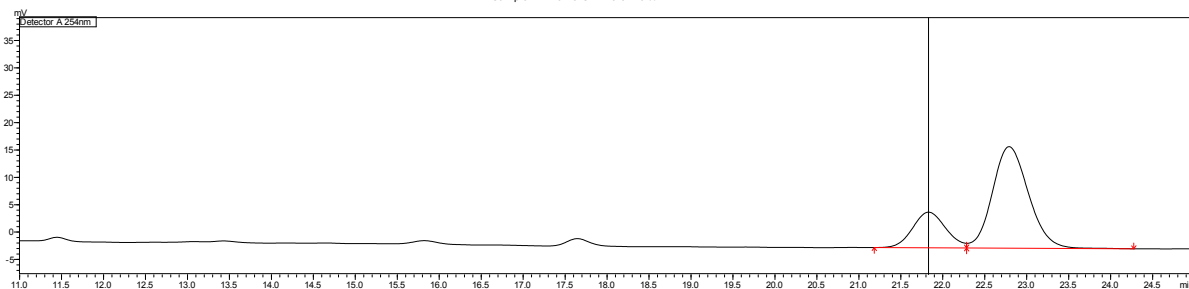

| Peak | Ret. Time | Area   | Height | Area%   |             |
|------|-----------|--------|--------|---------|-------------|
| 1    | 21.830    | 178575 | 6508   | 24.334  | <i>anti</i> |
| 2    | 22.790    | 555262 | 18543  | 75.666  | <i>anti</i> |
|      | Total     | 733837 | 25051  | 100.000 |             |

**2-[Hydroxy-(2-trifluoromethyl-phenyl)methyl]-cyclohexanone (Table 2, entry 12)**

Datafile Name: R 4-124 4C13 CHONE2.lcd  
 Sample Name: R 4-124 4C13 CHONE  
 Sample ID: R 4-124 4C13 CHONE

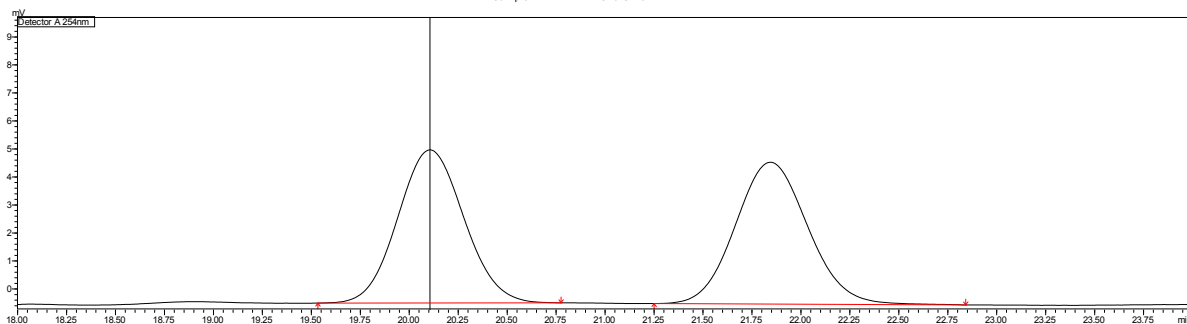

| Peak  | Ret. Time | Area   | Height | Area%   |             |
|-------|-----------|--------|--------|---------|-------------|
| 1     | 20.106    | 128741 | 5467   | 49.676  | <i>anti</i> |
| 2     | 21.845    | 130422 | 5064   | 50.324  | <i>anti</i> |
| Total |           | 259163 | 10531  | 100.000 |             |

Datafile Name: 4-124 4C13 CHONE2.lcd  
 Sample Name: 4-124 4C13 CHONE  
 Sample ID: 4-124 4C13 CHONE

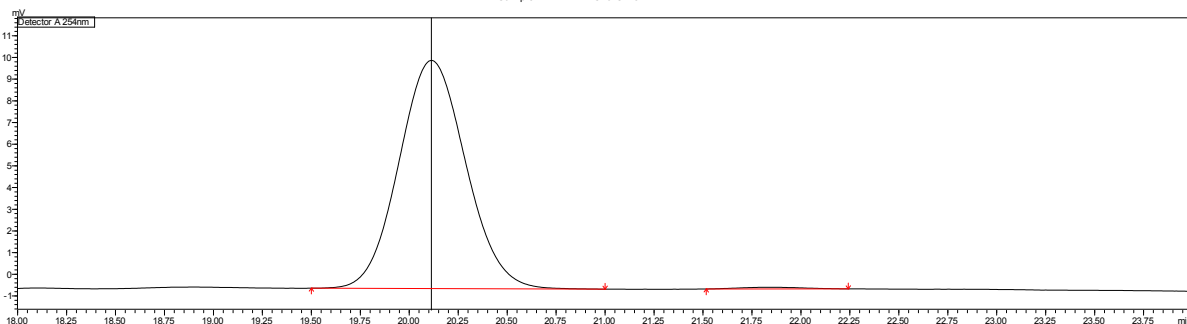

| Peak  | Ret. Time | Area   | Height | Area%   |             |
|-------|-----------|--------|--------|---------|-------------|
| 1     | 20.113    | 249515 | 10523  | 99.321  | <i>anti</i> |
| 2     | 21.835    | 1705   | 76     | 0.679   | <i>anti</i> |
| Total |           | 251220 | 10598  | 100.000 |             |

**2-[Hydroxy-(4-trifluoromethyl-phenyl)methyl]-cyclohexanone (Table 2, entry 13)**

Datafile Name: R4-124 4C13 CHONE1.lcd  
Sample Name: R4-124 4C13 CHONE  
Sample ID: R4-124 4C13 CHONE

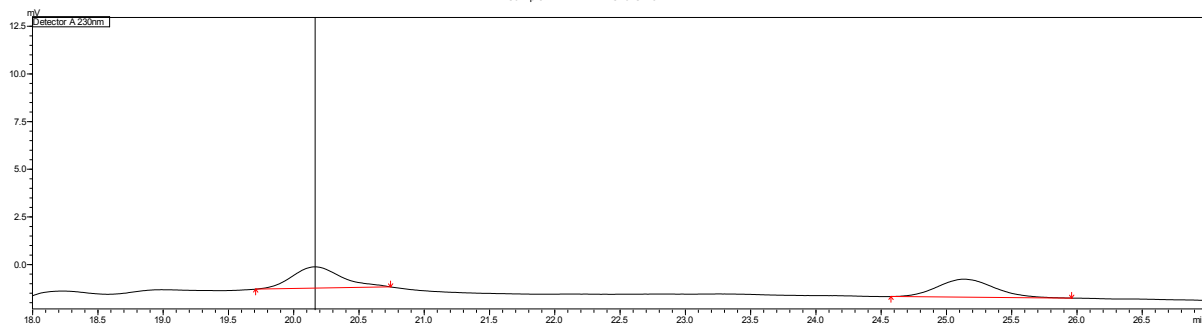

| Peak | Ret. Time | Area  | Height | Area%   |             |
|------|-----------|-------|--------|---------|-------------|
| 1    | 20.164    | 29462 | 1119   | 50.733  | <i>anti</i> |
| 2    | 25.131    | 28611 | 942    | 49.267  | <i>anti</i> |
|      | Total     | 58073 | 2061   | 100.000 |             |

Datafile Name: 4-124 4CF3 CHONE1.lcd  
Sample Name: 4-124 4CF3 CHONE  
Sample ID: 4-124 4CF3 CHONE

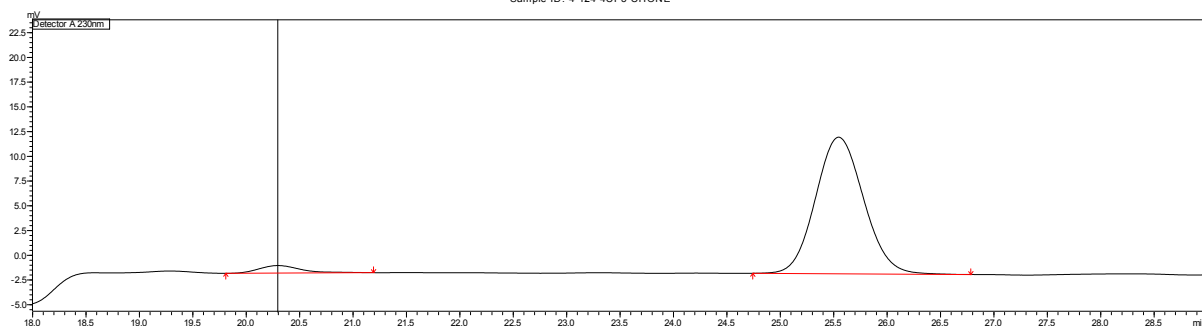

| Peak | Ret. Time | Area   | Height | Area%   |             |
|------|-----------|--------|--------|---------|-------------|
| 1    | 20.295    | 20775  | 762    | 4.588   | <i>anti</i> |
| 2    | 25.546    | 431988 | 13800  | 95.412  | <i>anti</i> |
|      | Total     | 452763 | 14563  | 100.000 |             |

**2-[Hydroxy-(2-nitro-phenyl)-methyl]-cyclopentanone (Table 3, entry 1)**

Datafile Name: R 4-125 2No2 Cp1.lcd  
 Sample Name: R 4-125 2No2 Cp  
 Sample ID: R 4-125 2No2 Cp

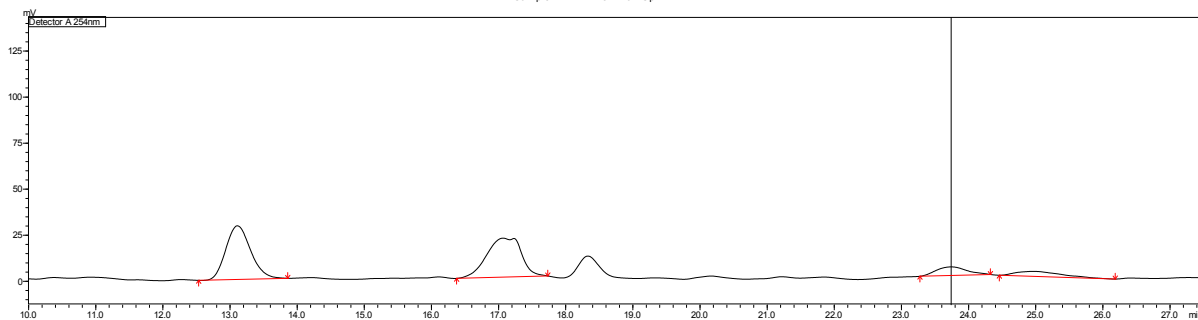

| Peak | Ret. Time | Area    | Height | Area%   |             |
|------|-----------|---------|--------|---------|-------------|
| 1    | 13.110    | 749394  | 29152  | 41.882  | <i>syn</i>  |
| 2    | 17.065    | 762898  | 21179  | 42.636  | <i>syn</i>  |
| 3    | 23.742    | 149201  | 4662   | 8.338   | <i>anti</i> |
| 4    | 24.964    | 127825  | 2700   | 7.144   | <i>anti</i> |
|      | Total     | 1789319 | 57693  | 100.000 |             |

Datafile Name: 4-125 2No2 Cp1.lcd  
 Sample Name: 4-125 2No2 Cp  
 Sample ID: 4-125 2No2 Cp

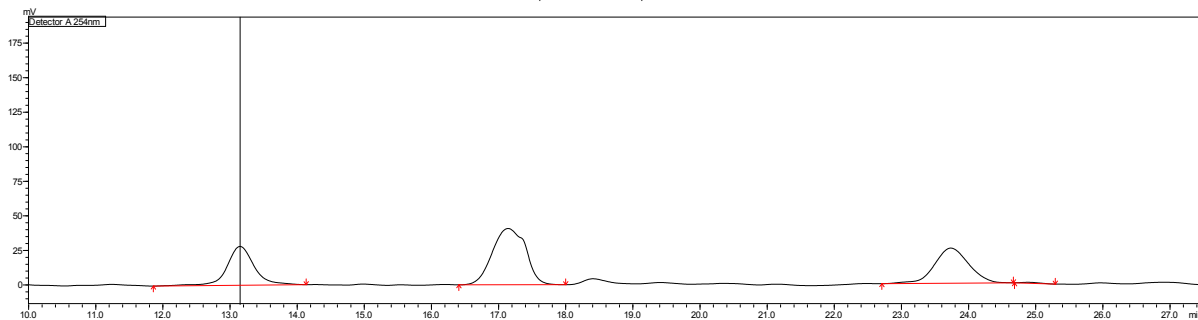

| Peak | Ret. Time | Area    | Height | Area%   |             |
|------|-----------|---------|--------|---------|-------------|
| 1    | 13.149    | 792807  | 28119  | 25.438  | <i>syn</i>  |
| 2    | 17.141    | 1411300 | 40754  | 45.282  | <i>syn</i>  |
| 3    | 23.736    | 900685  | 25411  | 28.899  | <i>anti</i> |
| 4    | 24.884    | 11889   | 648    | 0.381   | <i>anti</i> |
|      | Total     | 3116680 | 94933  | 100.000 |             |

**2-[Hydroxy-(4-nitro-phenyl)-methyl]-cyclopentanone (Table 3, entry 2)**

Datafile Name:RCP 4NO2 AD h1.lcd  
 Sample Name:RCP 4NO2 AD h  
 Sample ID:RCP 4NO2 AD h

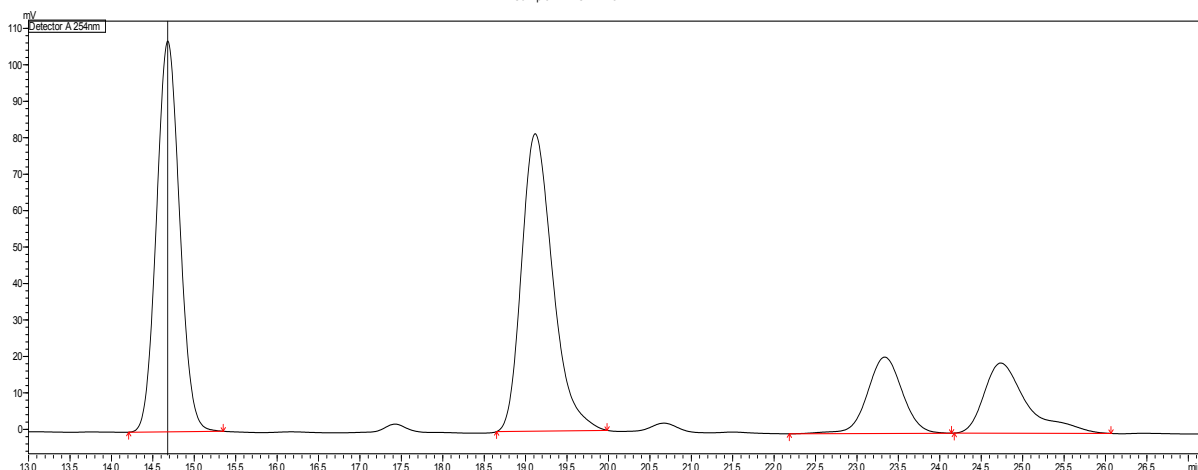

| Peak  | Ret. Time | Area    | Height | Area%   |             |
|-------|-----------|---------|--------|---------|-------------|
| 1     | 14.680    | 2081980 | 107220 | 37.683  | <i>syn</i>  |
| 2     | 19.116    | 2136189 | 81607  | 38.664  | <i>syn</i>  |
| 3     | 23.335    | 614255  | 20954  | 11.118  | <i>anti</i> |
| 4     | 24.736    | 692619  | 19259  | 12.536  | <i>anti</i> |
| Total |           | 5525042 | 229040 | 100.000 |             |

Datafile Name:4-125 4NO2 CPone2.lcd  
 Sample Name: 4-125 4NO2 CPone  
 Sample ID: 4-125 4NO2 CPone

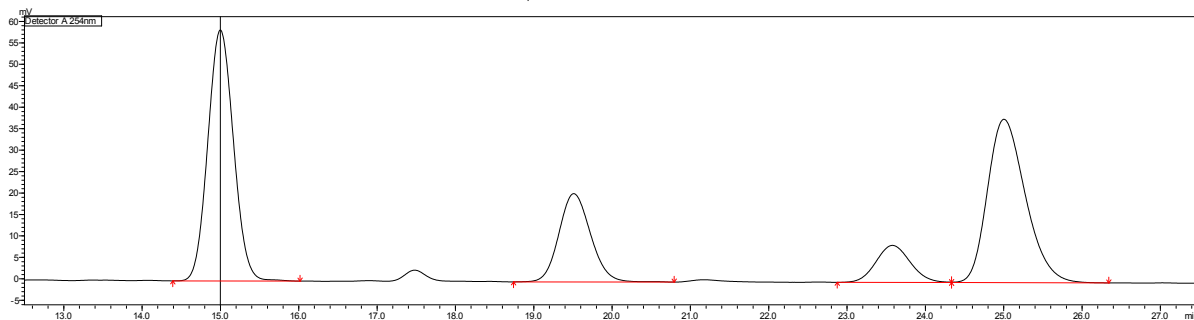

| Peak  | Ret. Time | Area    | Height | Area%   |             |
|-------|-----------|---------|--------|---------|-------------|
| 1     | 14.999    | 1333087 | 58505  | 38.564  | <i>syn</i>  |
| 2     | 19.511    | 577764  | 20587  | 16.714  | <i>syn</i>  |
| 3     | 23.580    | 263504  | 8632   | 7.623   | <i>anti</i> |
| 4     | 25.003    | 1282495 | 38081  | 37.100  | <i>anti</i> |
| Total |           | 3456849 | 125805 | 100.000 |             |

**2-[Hydroxy-(2-fluoro-phenyl)-methyl]-cyclopentanone (Table 3, entry 3)**

Datafile Name: R\_CP 2F1.lcd  
 Sample Name: R\_CP 2F  
 Sample ID: R\_CP 2F

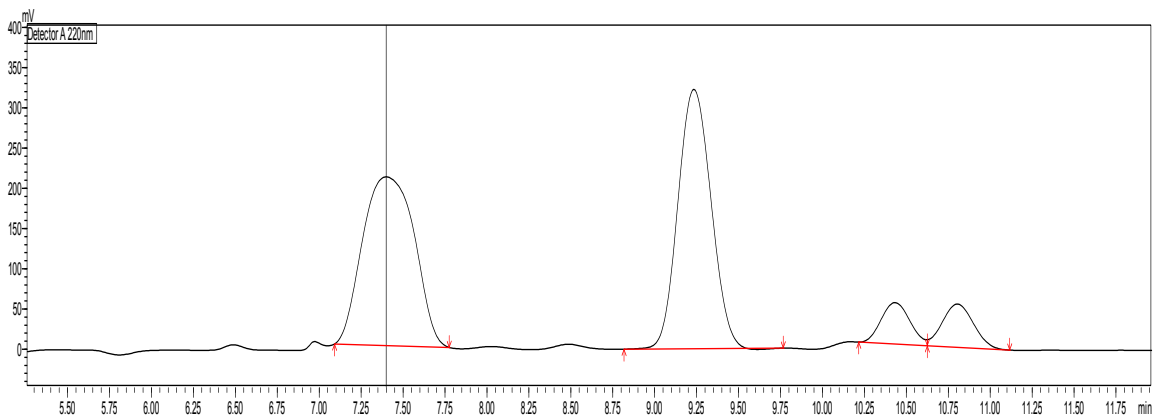

| Peak  | Ret. Time | Area     | Height | Area%   |             |
|-------|-----------|----------|--------|---------|-------------|
| 1     | 7.399     | 4508736  | 209627 | 44.045  | <i>syn</i>  |
| 2     | 9.234     | 4422511  | 322360 | 43.202  | <i>syn</i>  |
| 3     | 10.432    | 615946   | 51474  | 6.017   | <i>anti</i> |
| 4     | 10.804    | 689574   | 53720  | 6.736   | <i>anti</i> |
| Total |           | 10236766 | 637181 | 100.000 |             |

Datafile Name: 4-125 2F CPone2.lcd  
 Sample Name: 4-125 2F CPone  
 Sample ID: 4-125 2F CPone

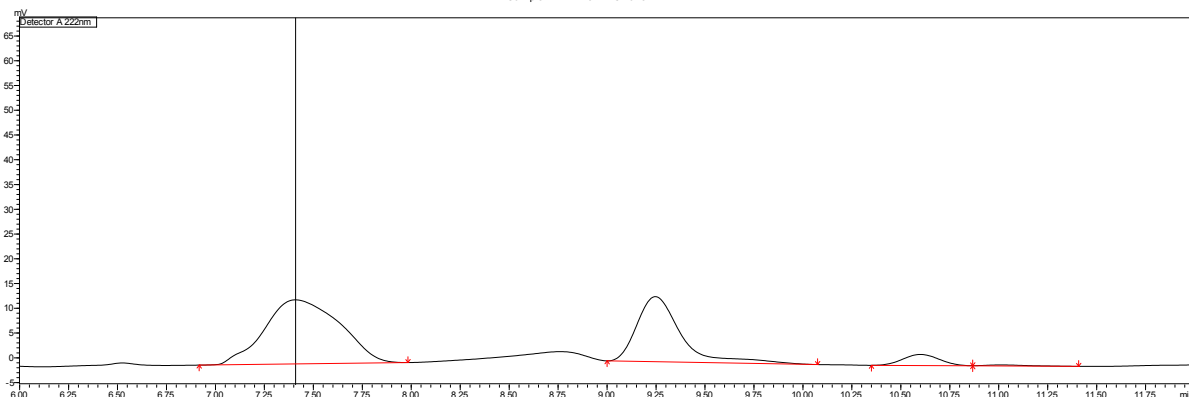

| Peak  | Ret. Time | Area   | Height | Area%   |             |
|-------|-----------|--------|--------|---------|-------------|
| 1     | 7.409     | 346353 | 12952  | 59.430  | <i>syn</i>  |
| 2     | 9.246     | 204349 | 13145  | 35.064  | <i>syn</i>  |
| 3     | 10.601    | 29066  | 2244   | 4.987   | <i>anti</i> |
| 4     | 11.015    | 3019   | 209    | 0.518   | <i>anti</i> |
| Total |           | 582788 | 28550  | 100.000 |             |

**2-[Hydroxy-(4-fluoro-phenyl)-methyl]-cyclopentanone (Table 3, entry 4)**

Datafile Name: R 4-23 4 F ad-h1.lcd  
 Sample Name: R 4-23 4 Cl ad-h  
 Sample ID: R 4-23 4 Cl ad-h

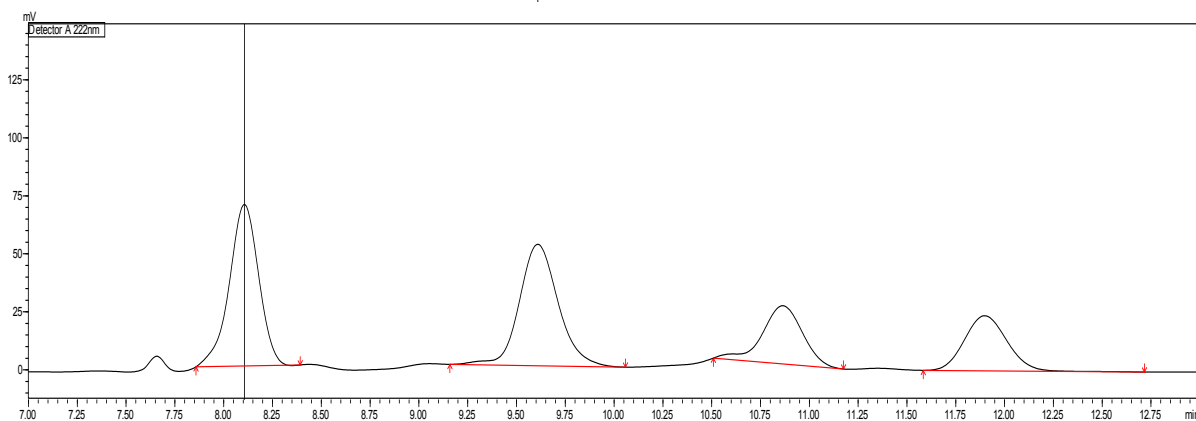

| Peak  | Ret. Time | Area    | Height | Area%   |             |
|-------|-----------|---------|--------|---------|-------------|
| 1     | 8.106     | 727759  | 69602  | 33.541  | <i>syn</i>  |
| 2     | 9.609     | 724471  | 52389  | 33.390  | <i>syn</i>  |
| 3     | 10.863    | 358024  | 25047  | 16.501  | <i>anti</i> |
| 4     | 11.898    | 359486  | 23752  | 16.568  | <i>anti</i> |
| Total |           | 2169740 | 170789 | 100.000 |             |

Datafile Name: 4-125 4F CPone1.lcd  
 Sample Name: R 4-125 4F CPone  
 Sample ID: R 4-125 4F CPone

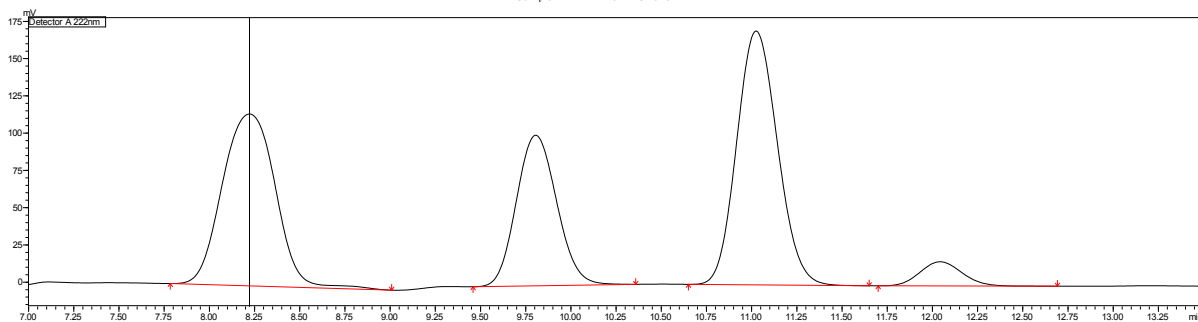

| Peak  | Ret. Time | Area    | Height | Area%   |             |
|-------|-----------|---------|--------|---------|-------------|
| 1     | 8.222     | 2352997 | 115365 | 34.313  | <i>syn</i>  |
| 2     | 9.805     | 1568845 | 101036 | 22.878  | <i>syn</i>  |
| 3     | 11.025    | 2673358 | 170413 | 38.985  | <i>anti</i> |
| 4     | 12.042    | 262198  | 16220  | 3.824   | <i>anti</i> |
| Total |           | 6857399 | 403034 | 100.000 |             |

**2-[Hydroxy-(2-chloro-phenyl)methyl]-cyclohexanone (Table 3, entry 5)**



Datafile Name: R 4-23 2CI1.lcd  
 Sample Name: R 4-23 2CI  
 Sample ID: R 4-23 2CI

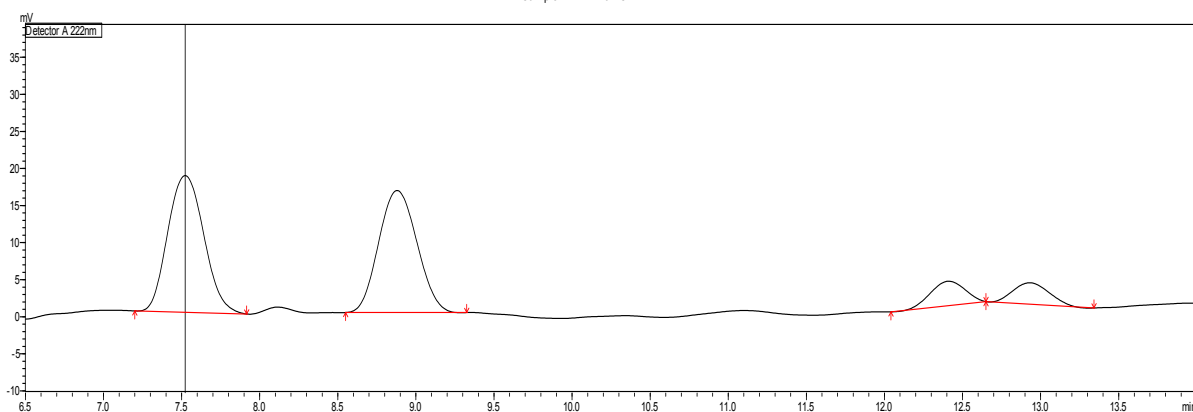

| Peak  | Ret. Time | Area   | Height | Area%   |             |
|-------|-----------|--------|--------|---------|-------------|
| 1     | 7.522     | 296558 | 18441  | 43.962  | <i>syn</i>  |
| 2     | 8.880     | 280799 | 16465  | 41.625  | <i>syn</i>  |
| 3     | 12.411    | 51059  | 3298   | 7.569   | <i>anti</i> |
| 4     | 12.930    | 46168  | 2890   | 6.844   | <i>anti</i> |
| Total |           | 674585 | 41095  | 100.000 |             |

Datafile Name: 4-125 2CI Cp1.lcd  
 Sample Name: 4-125 2CI Cp  
 Sample ID: 4-125 2CI Cp

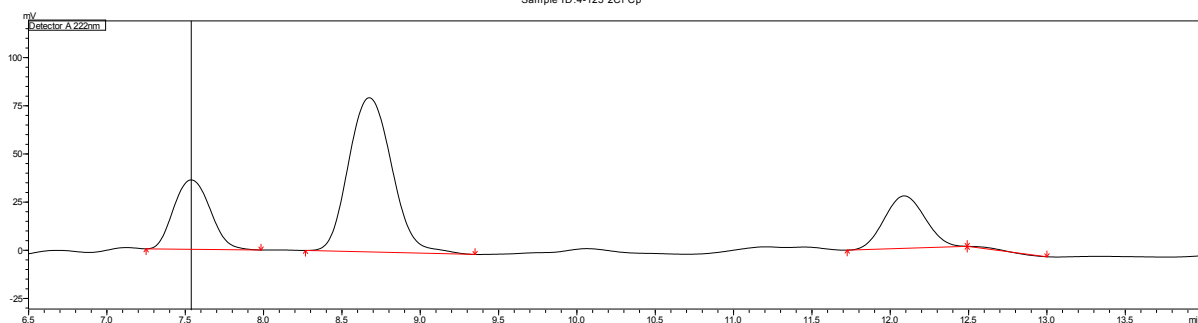

| Peak  | Ret. Time | Area    | Height | Area%   |             |
|-------|-----------|---------|--------|---------|-------------|
| 1     | 7.538     | 583756  | 36023  | 22.284  | <i>syn</i>  |
| 2     | 8.674     | 1540277 | 80080  | 58.798  | <i>syn</i>  |
| 3     | 12.089    | 492868  | 27214  | 18.815  | <i>anti</i> |
| 4     | 12.504    | 2695    | 114    | 0.103   | <i>anti</i> |
| Total |           | 2619595 | 143430 | 100.000 |             |

**2-[Hydroxy-(4-chloro-phenyl)methyl]-cyclohexanone (Table 3, entry 6)**

Datafile Name: R 4-23 4 CI ad-h1 (2).lcl  
 Sample Name: R 4-23 4 F ad-h  
 Sample ID: R 4-23 4 F ad-h

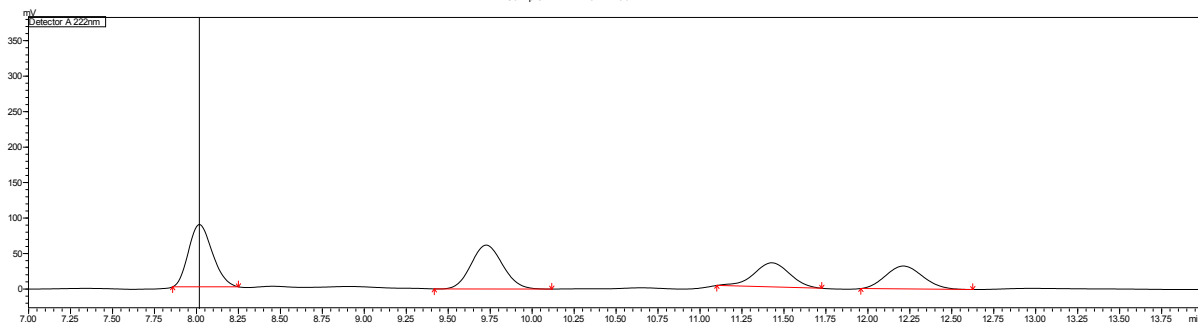

| Peak | Ret. Time | Area    | Height | Area%   |             |
|------|-----------|---------|--------|---------|-------------|
| 1    | 8.017     | 869216  | 87910  | 32.476  | <i>anti</i> |
| 2    | 9.726     | 809696  | 61856  | 30.252  | <i>syn</i>  |
| 3    | 11.427    | 503213  | 33958  | 18.801  | <i>syn</i>  |
| 4    | 12.211    | 494381  | 32202  | 18.471  | <i>anti</i> |
|      | Total     | 2676505 | 215926 | 100.000 |             |

Datafile Name: 4-125 4 CI Cp1.lcl  
 Sample Name: 4-125 4 CI Cp  
 Sample ID: 4-125 4 CI Cp

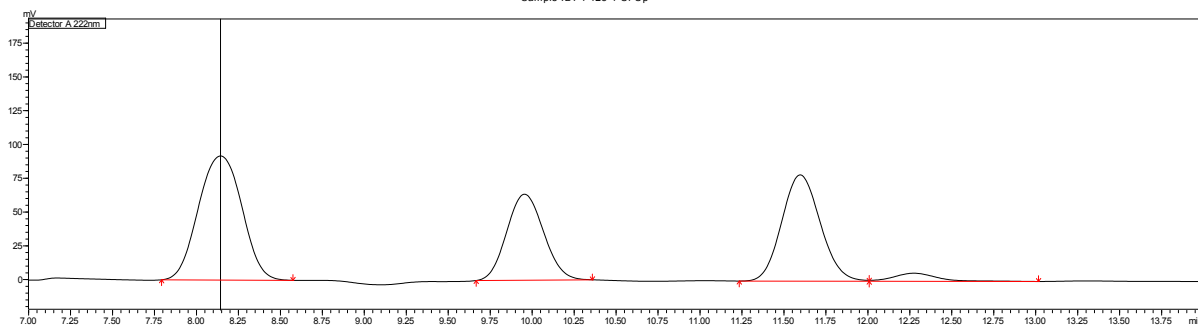

| Peak | Ret. Time | Area    | Height | Area%   |             |
|------|-----------|---------|--------|---------|-------------|
| 1    | 8.143     | 1653487 | 91829  | 41.467  | <i>anti</i> |
| 2    | 9.954     | 971428  | 63644  | 24.362  | <i>syn</i>  |
| 3    | 11.597    | 1255214 | 78623  | 31.479  | <i>syn</i>  |
| 4    | 12.275    | 107350  | 5999   | 2.692   | <i>anti</i> |
|      | Total     | 3987479 | 240095 | 100.000 |             |

**2-[Hydroxy-(2-methoxy-phenyl)methyl]-cyclopentanone (Table 3, entry 7)**

Datafile Name: R 4-125 2 OMe Cp2.lcd  
 Sample Name: R 4-125 2 OMe Cp  
 Sample ID: R 4-125 2 OMe Cp

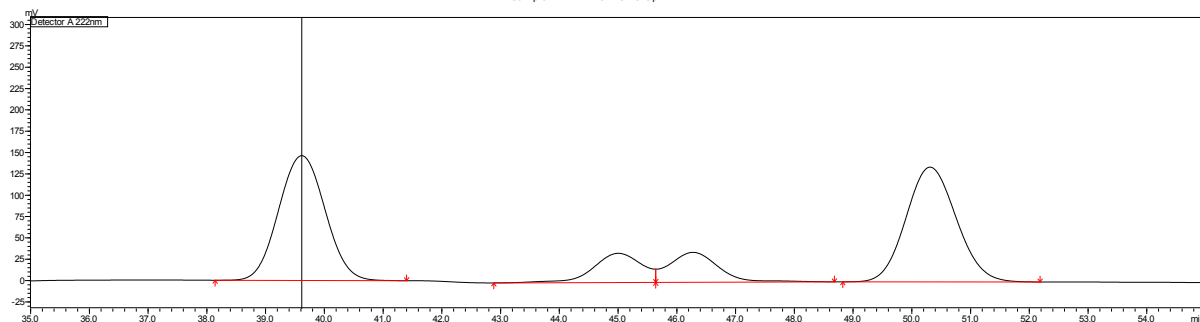

| Peak | Ret. Time | Area     | Height | Area%   |             |
|------|-----------|----------|--------|---------|-------------|
| 1    | 39.615    | 8041408  | 146221 | 40.125  | <i>anti</i> |
| 2    | 45.003    | 1971409  | 34206  | 9.837   | <i>syn</i>  |
| 3    | 46.275    | 2021712  | 35043  | 10.088  | <i>syn</i>  |
| 4    | 50.310    | 8006593  | 134436 | 39.951  | <i>anti</i> |
|      | Total     | 20041121 | 349907 | 100.000 |             |

Datafile Name: 4-125 2OMe CPONE1.lcd  
 Sample Name: 4-125 2OMe CPONE  
 Sample ID: 4-125 2OMe CPONE

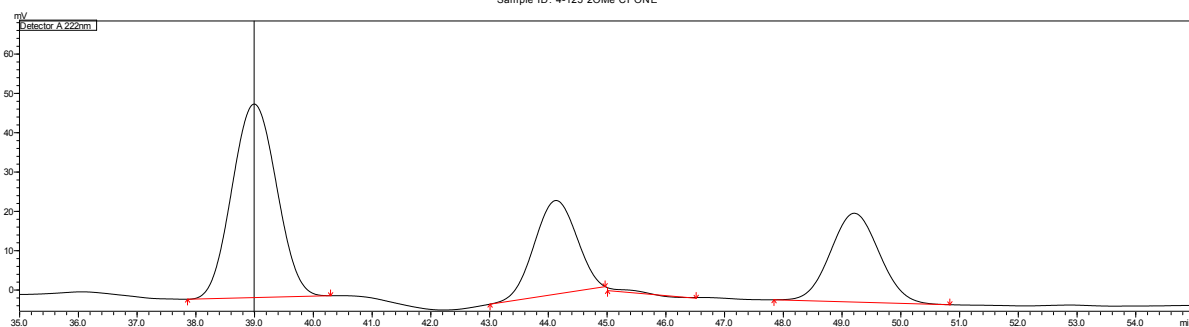

| Peak | Ret. Time | Area    | Height | Area%   |             |
|------|-----------|---------|--------|---------|-------------|
| 1    | 38.993    | 2596848 | 49221  | 50.784  | <i>anti</i> |
| 2    | 44.132    | 1191098 | 23798  | 23.293  | <i>syn</i>  |
| 3    | 45.021    | 18701   | 721    | 0.366   | <i>syn</i>  |
| 4    | 49.207    | 1306900 | 22578  | 25.558  | <i>anti</i> |
|      | Total     | 5113546 | 96319  | 100.000 |             |

**2-[Hydroxy-(4-methoxy-phenyl)methyl]-cyclopentanone (Table 3, entry 8)**

Datafile Name: R 4-23 4-OMe1.lcd  
 Sample Name: R 4-23 4-OMe  
 Sample ID: R 4-23 4-OMe

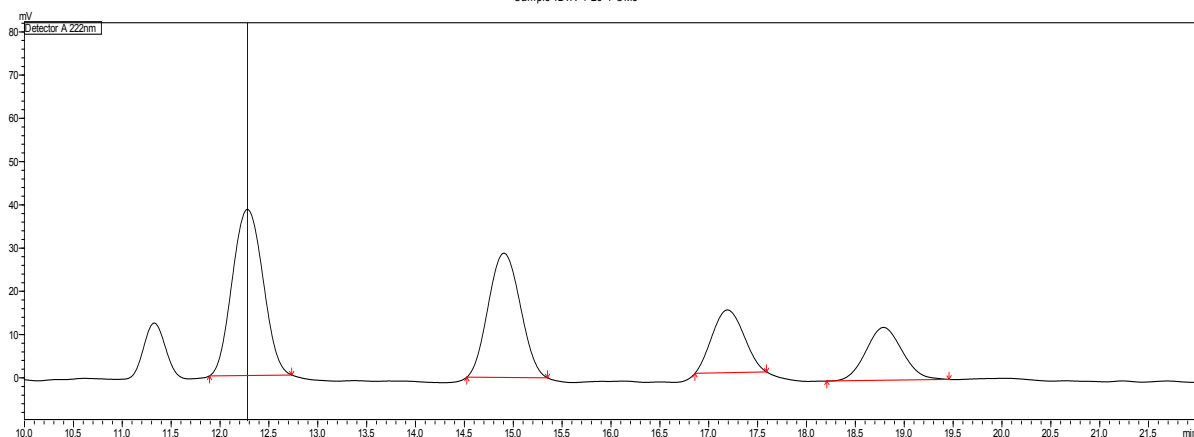

| Peak  | Ret. Time | Area    | Height | Area%   |             |
|-------|-----------|---------|--------|---------|-------------|
| 1     | 12.281    | 640290  | 33206  | 33.014  | <i>syn</i>  |
| 2     | 14.904    | 654747  | 28749  | 33.012  | <i>syn</i>  |
| 3     | 17.192    | 327404  | 14515  | 16.881  | <i>anti</i> |
| 4     | 18.787    | 317011  | 12227  | 16.345  | <i>anti</i> |
| Total |           | 1939451 | 88696  | 100.000 |             |

Datafile Name: 4-125 4-OMe 5mol% -16.lcd  
 Sample Name: 4-125 4-OMe 5mol% -15  
 Sample ID: 4-125 4-OMe 5mol% -15

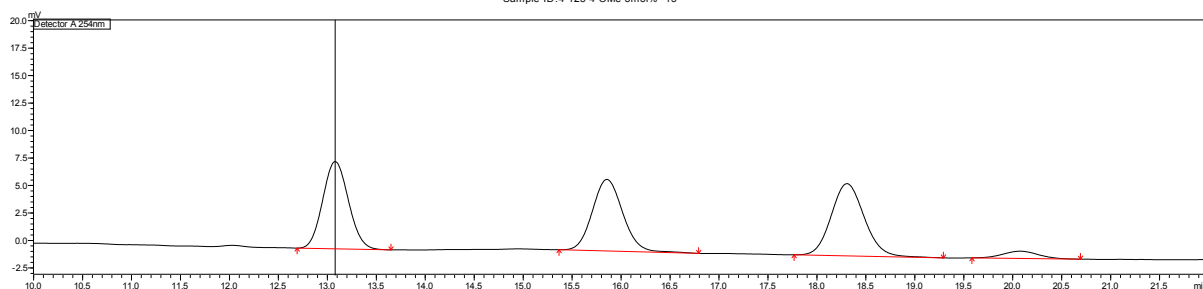

| Peak  | Ret. Time | Area   | Height | Area%   |             |
|-------|-----------|--------|--------|---------|-------------|
| 1     | 13.080    | 145269 | 7939   | 31.750  | <i>syn</i>  |
| 2     | 15.854    | 140958 | 6511   | 30.808  | <i>syn</i>  |
| 3     | 18.306    | 154808 | 6575   | 33.835  | <i>anti</i> |
| 4     | 20.076    | 16505  | 660    | 3.607   | <i>anti</i> |
| Total |           | 457541 | 21685  | 100.000 |             |

**HPLC Data of continuous cycle of IL 3 (Table 4, entry 1-7)**

**2-[Hydroxy-(4-nitro-phenyl)-methyl]-cyclohexanone (Table 4, entry 1)**

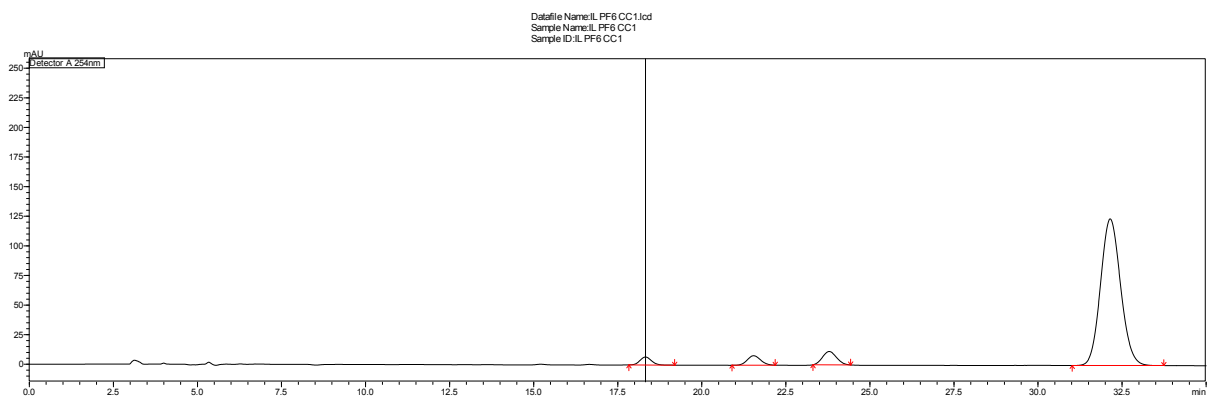

| Peak  | Ret. Time | Area    | Height | Area%   |             |
|-------|-----------|---------|--------|---------|-------------|
| 1     | 18.325    | 159105  | 6704   | 2.721   | <i>syn</i>  |
| 2     | 21.541    | 221144  | 8009   | 3.781   | <i>syn</i>  |
| 3     | 23.790    | 325986  | 11243  | 5.574   | <i>anti</i> |
| 4     | 32.147    | 5142022 | 123805 | 87.924  | <i>anti</i> |
| Total |           | 5848257 | 149760 | 100.000 |             |

**2-[Hydroxy-(4-nitro-phenyl)-methyl]-cyclohexanone (Table 4, entry 2)**

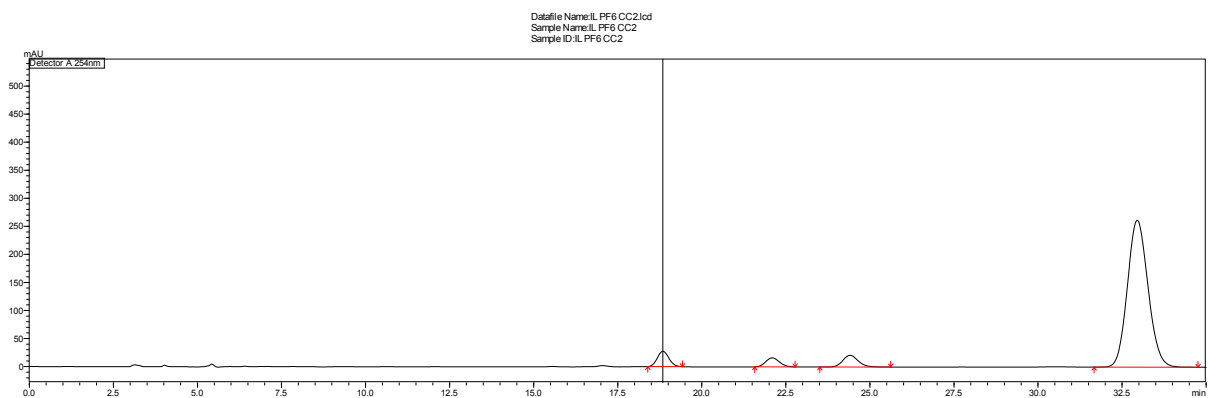

| Peak  | Ret. Time | Area     | Height | Area%   |             |
|-------|-----------|----------|--------|---------|-------------|
| 1     | 18.842    | 654529   | 27351  | 5.058   | <i>syn</i>  |
| 2     | 22.092    | 453656   | 16140  | 3.506   | <i>syn</i>  |
| 3     | 24.409    | 663348   | 20890  | 5.126   | <i>anti</i> |
| 4     | 32.951    | 11168203 | 261813 | 86.309  | <i>anti</i> |
| Total |           | 12939734 | 326194 | 100.000 |             |

**2-[Hydroxy-(4-nitro-phenyl)-methyl]-cyclohexanone (Table 4, entry 3)**

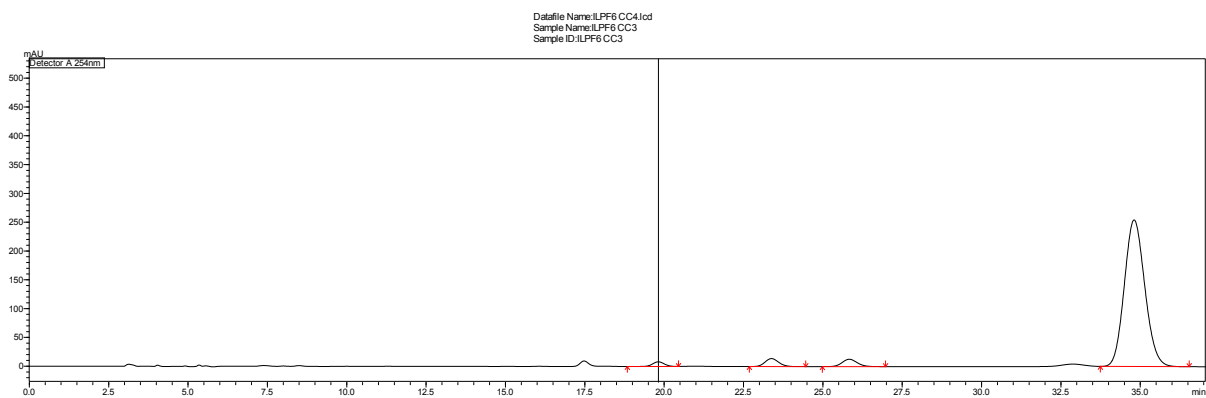

| Peak  | Ret. Time | Area     | Height | Area%   |             |
|-------|-----------|----------|--------|---------|-------------|
| 1     | 19.818    | 206054   | 8071   | 1.654   | <i>syn</i>  |
| 2     | 23.379    | 411967   | 13834  | 3.306   | <i>syn</i>  |
| 3     | 25.833    | 418687   | 12743  | 3.360   | <i>anti</i> |
| 4     | 34.806    | 11423133 | 254528 | 91.680  | <i>anti</i> |
| Total |           | 12459840 | 289177 | 100.000 |             |

**2-[Hydroxy-(4-nitro-phenyl)-methyl]-cyclohexanone (Table 4, entry 4)**

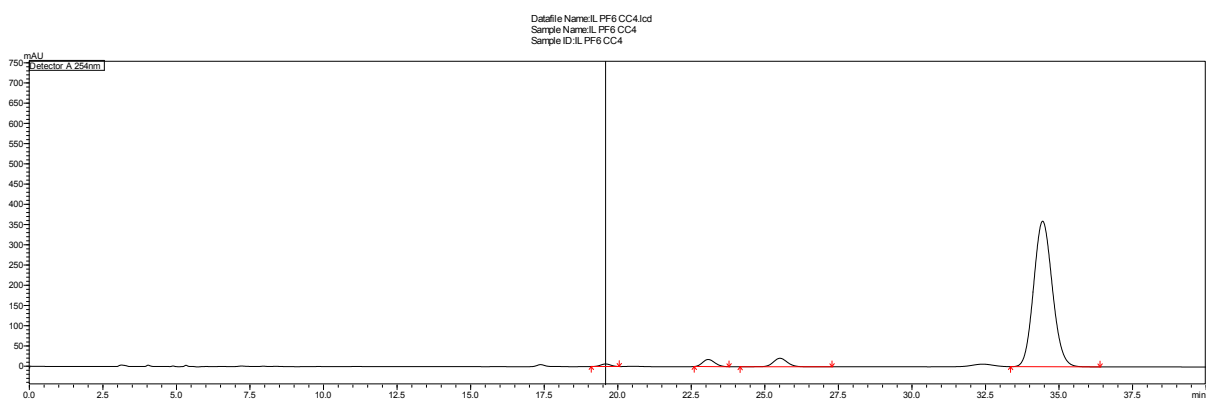

| Peak  | Ret. Time | Area     | Height | Area%   |             |
|-------|-----------|----------|--------|---------|-------------|
| 1     | 19.587    | 149874   | 6289   | 0.868   | <i>syn</i>  |
| 2     | 23.076    | 506750   | 17611  | 2.934   | <i>syn</i>  |
| 3     | 25.514    | 700717   | 20979  | 4.056   | <i>anti</i> |
| 4     | 34.443    | 15916759 | 359811 | 92.142  | <i>anti</i> |
| Total |           | 17274100 | 404690 | 100.000 |             |

**2-[Hydroxy-(4-nitro-phenyl)-methyl]-cyclohexanone (Table 4, entry 5)**

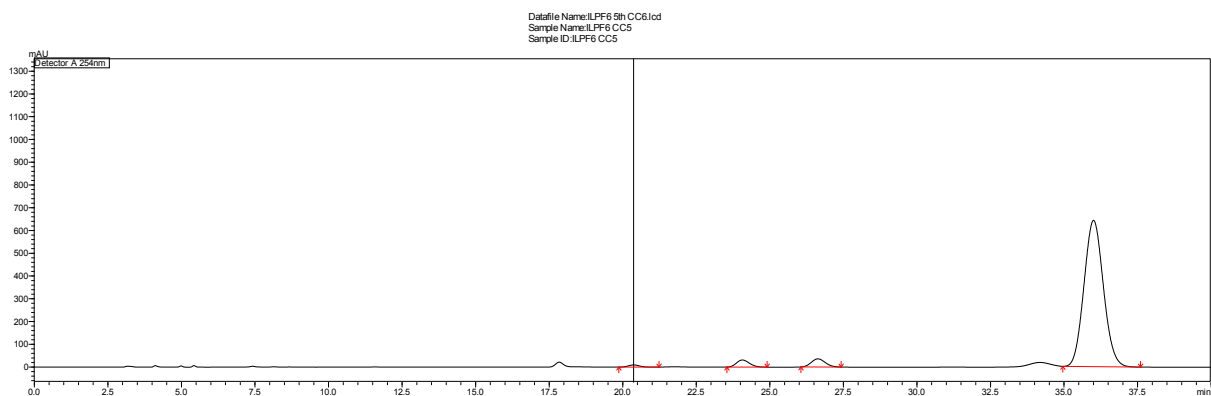

| Peak  | Ret. Time | Area     | Height | Area%   |             |
|-------|-----------|----------|--------|---------|-------------|
| 1     | 20.369    | 242451   | 9466   | 0.760   | <i>syn</i>  |
| 2     | 24.066    | 951177   | 31157  | 2.980   | <i>syn</i>  |
| 3     | 26.633    | 1178656  | 35736  | 3.693   | <i>anti</i> |
| 4     | 36.003    | 29546440 | 642866 | 92.568  | <i>anti</i> |
| Total |           | 31918724 | 719225 | 100.000 |             |

## 2-[Hydroxy-(4-nitro-phenyl)-methyl]-cyclohexanone (Table 4, entry 6)

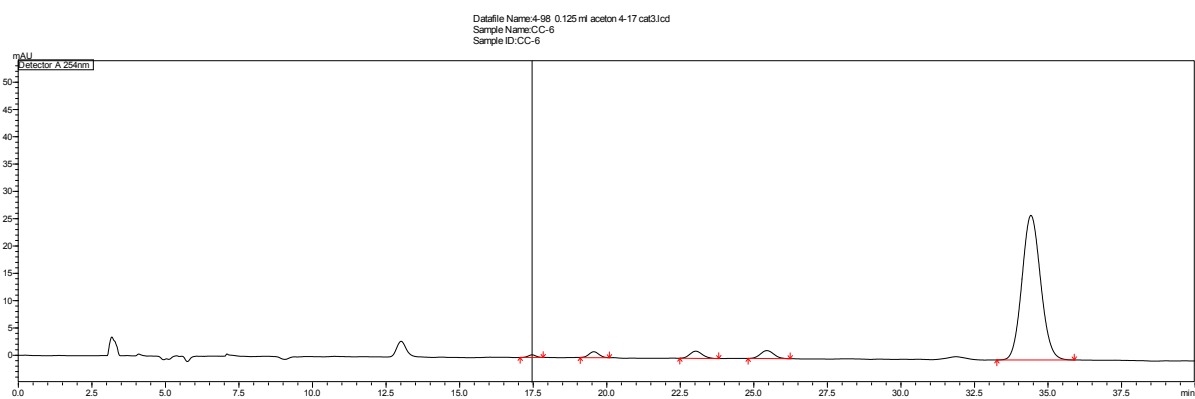

| Peak  | Ret. Time | Area    | Height | Area%   |                      |
|-------|-----------|---------|--------|---------|----------------------|
| 1     | 17.463    | 8645    | 480    | 0.669   | 4-Nitro-benzaldehyde |
| 2     | 19.558    | 26156   | 1091   | 2.024   | <i>syn</i>           |
| 3     | 23.023    | 38819   | 1316   | 3.004   | <i>syn</i>           |
| 4     | 25.439    | 46515   | 1460   | 3.600   | <i>anti</i>          |
| 5     | 34.419    | 1171972 | 26483  | 90.702  | <i>anti</i>          |
| Total |           | 1292108 | 30829  | 100.000 |                      |

## 2-[Hydroxy-(4-nitro-phenyl)-methyl]-cyclohexanone (Table 4, entry 7)

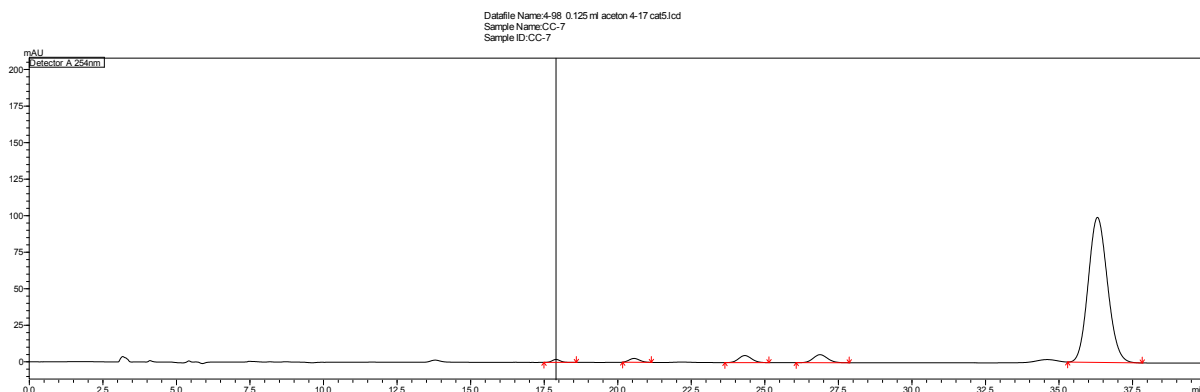

| Peak  | Ret. Time | Area    | Height | Area%   |                      |
|-------|-----------|---------|--------|---------|----------------------|
| 1     | 17.901    | 38827   | 2020   | 0.782   | 4-Nitro-benzaldehyde |
| 2     | 20.556    | 65048   | 2612   | 1.310   | <i>syn</i>           |
| 3     | 24.322    | 149336  | 4832   | 3.008   | <i>syn</i>           |
| 4     | 26.879    | 186138  | 5493   | 3.750   | <i>anti</i>          |
| 5     | 36.305    | 4524463 | 99232  | 91.149  | <i>anti</i>          |
| Total |           | 4963813 | 114190 | 100.000 |                      |

## 2-[Hydroxy-(4-nitro-phenyl)-methyl]-cyclohexanone (use of IL3 (0.4 mol%))

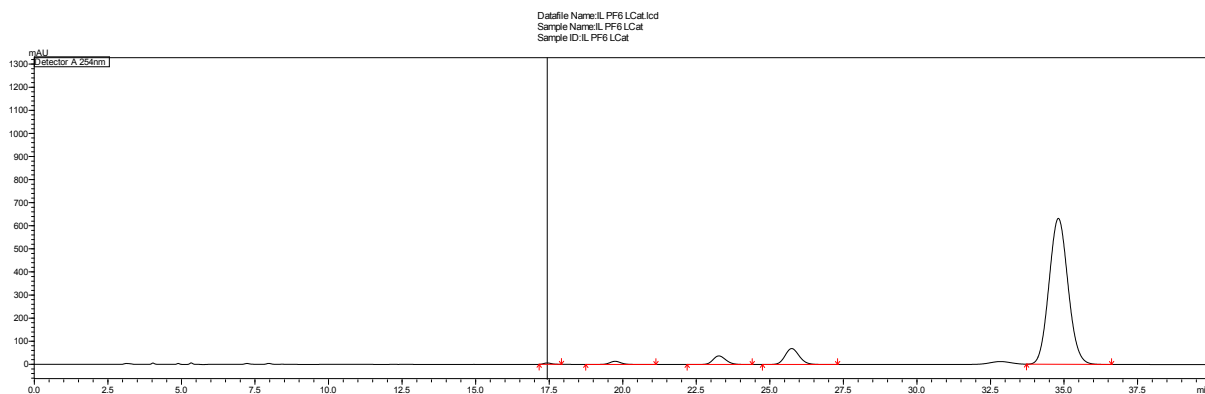

| Peak  | Ret. Time | Area     | Height | Area%   |                      |
|-------|-----------|----------|--------|---------|----------------------|
| 1     | 17.434    | 101816   | 5835   | 0.316   | 4-Nitro-benzaldehyde |
| 2     | 19.740    | 361530   | 13691  | 1.121   | <i>syn</i>           |
| 3     | 23.267    | 1121887  | 37033  | 3.477   | <i>syn</i>           |
| 4     | 25.743    | 2301854  | 68957  | 7.135   | <i>anti</i>          |
| 5     | 34.807    | 28375453 | 631909 | 87.952  | <i>anti</i>          |
| Total |           | 32262540 | 757425 | 100.000 |                      |
